# Supplementary material for: Energetic pathways and influence of the metallacyclobutane intermediates formed during isobutene/2-butene cross-metathesis over WH3/Al2O3 supported catalyst
Source: Royal Society of Chemistry journal article supplement (doi:10.1039/c5cy02154e), 2016-01-01
Supplement: c5cy02154e1.pdf [file c5cy02154e1.pdf]

# **Energetic pathways and influence of the metallacyclobutane intermediates formed during isobutene / 2-butene cross-metathesis over $\text{WH}_3/\text{Al}_2\text{O}_3$ supported catalyst**

Alessandro Motta, §,\* Kai C. Szeto,† Mostafa Taoufik,† and Christopher P. Nicholas‡,\*

*E-mail:* [Christopher.Nicholas@uop.com](mailto:Christopher.Nicholas@uop.com); [alessandro.motta@uniroma1.it](mailto:alessandro.motta@uniroma1.it)

Phone: (+1) 847-391-1261 (CPN); (+39) 06 49913568 (AM)

§ Dipartimento di Chimica and INSTM UdR Roma, Università degli Studi di Roma “La Sapienza”  
P.le A. Moro 5, Roma, I-00185, Italy

† Laboratoire de Chimie Organométallique de Surface, Université Lyon 1, C2P2, CNRS UMR  
5265, ICL, CPE Lyon, 43 Bd du 11 Novembre 1918, 69616 Villeurbanne, France

‡ Exploratory Catalysis Research, UOP LLC, a Honeywell Company 25 East Algonquin Road, Des  
Plaines, IL 60017 (USA)

Dedicated to the memory of Yves Chauvin (1930-2015) in honor of his seminal contribution to the understanding of metallacyclobutanes

## Evaluation of the $\Delta G$ associated to the metallacyclobutane formation and to the metathesis reaction

Considering the reaction (eq. 1):

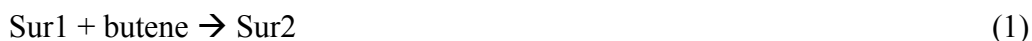

In which Sur1 is the W-based catalyst supported on the alumina surface and Sur2 is the metallacyclobutane formed after the butene addition. In this case, the Gibbs free energy of reaction can be derived as (eq. 2):

$$\Delta G_{\text{reac}} = \Delta H_{\text{reac}} - T\Delta S_{\text{reac}} \quad (2)$$

$\Delta H_{\text{reac}}$  can be safely replaced by  $\Delta E_{0K} + \text{ZPE}$  where  $\Delta E_{0K}$  is the electronic energy computed as the result of the optimization procedure and ZPE represents the zero point energy computed with the frequency analysis. Moreover,  $\Delta S_{\text{reac}}$  can be expressed by its components (eq. 3):

$$\Delta G_{\text{reac}} = (\Delta E_{0K} + \text{ZPE}) - T(S_{\text{Sur2}} - S_{\text{Sur1}} - S_{\text{butene}}) \quad (3)$$

We set  $S_{\text{Sur2}} - S_{\text{Sur1}} = 0$  since the entropic variation on the surface can be neglected and we express  $S_{\text{butene}}$  with its translational (Tran), rotational (Rot) and vibrational (Vib) components (eq. 4):

$$\Delta G_{\text{reac}} = (\Delta E_{0K} + \text{ZPE}) - T[S(\text{trans})_{\text{butene}} + TS(\text{Rot})_{\text{butene}} + TS(\text{Vib})_{\text{butene}}]. \quad (4)$$

From a simplified molecular model calculation (Chart S1) it has been verified that ZPE and  $TS(\text{Vib})_{\text{butene}}$  represent minority contributions on the overall energy evaluations.

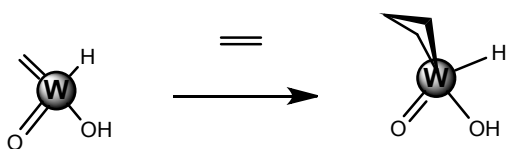

**Chart S1. Molecular model adopted for the evaluation of the entropic contribution in the formation of metallacyclobutanes.**

Moreover, it was seen that  $ZPE \approx TS(\text{Vib})_{\text{butene}}$ , then the eq. 4 can be simplified (eq. 5):

$$\Delta G_{\text{reac}} = \Delta E_{0\text{K}} - T[S(\text{trans})_{\text{butene}} + S(\text{Rot})_{\text{butene}}] \quad (5)$$

Similar considerations can be used to evaluate the Gibbs free energy of the overall metathesis reaction (eq. 6):

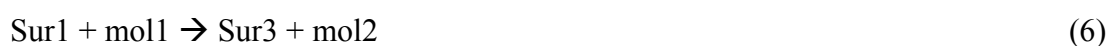

Where Sur1 and Sur3 represent the supported catalyst species before and after the reaction (**1**, **2a**, **2b**, **2c** or **2d**), respectively; mol1 represents the butene substrate (1-butene, *trans*-2-butene or isobutene) and mol2 represent the product of the metathesis (C2, C3, C5 or C6 alkenes). In this case, the equation (5) becomes (eq. 7):

$$\Delta G_{\text{reac}} = \Delta E_{0\text{K}} - T[S(\text{trans})_{\text{mol2}} + S(\text{Rot})_{\text{mol2}} - S(\text{trans})_{\text{mol1}} - S(\text{Rot})_{\text{mol1}}] \quad (7)$$

Or in a more contracted form (eq. 8):

$$\Delta G_{\text{reac}} = \Delta E_{0\text{K}} - T[\Delta S(\text{trans}) + \Delta S(\text{Rot})] \quad (8)$$

**Table S1. All the butene insertions into supported species 1. Values refer to the metallacycle formation energy (kcal/mol)**

|           |         |         |       |                                                                                            |                                                                                             |
|-----------|------------------------------------------------------------------------------------------|------------------------------------------------------------------------------------------|------------------------------------------------------------------------------------------|--------------------------------------------------------------------------------------------|---------------------------------------------------------------------------------------------|
|           | <i>(1,2) insertion</i>                                                                   | <i>(2,1) insertion</i>                                                                   | <i>(1,2) insertion</i>                                                                   | <i>(2,1) insertion</i>                                                                     |                                                                                             |
| Top Path  | <br>4.2 | <br>5.6 | <br>6.0 | <br>13.6 | <br>8.7  |
| Side Path | <br>3.8 | <br>3.9 | <br>8.4 | <br>8.7  | <br>16.2 |

Cartesian coordinates (Å) and associated energies (Hartree) of all the structures shows in the activation steps and in the investigated catalytic cycles.

**Species 1. E: -2329.3570646885**

|    |             |             |              |
|----|-------------|-------------|--------------|
| Al | 0.725219127 | 4.903298014 | 8.589493309  |
| Al | 4.875382030 | 6.972882891 | 7.212615812  |
| O  | 3.415416046 | 7.191493343 | 11.207092703 |
| O  | 7.711289259 | 4.853482497 | 9.762978595  |
| O  | 3.405364286 | 6.845685286 | 8.454549006  |
| O  | 7.782528083 | 5.007205837 | 7.123787946  |
| Al | 4.786047776 | 3.070425849 | 10.032169620 |
| Al | 0.663041230 | 0.965943814 | 11.342209431 |
| O  | 7.629705505 | 0.808371044 | 7.279939859  |
| O  | 3.511902482 | 3.061497679 | 8.644714790  |
| O  | 7.571632117 | 1.126179230 | 10.080227444 |
| O  | 3.508516226 | 2.883984583 | 11.349228069 |
| Al | 7.775791353 | 3.022960667 | 9.935889679  |
| Al | 3.510993528 | 0.974582630 | 11.336434183 |
| O  | 4.993395794 | 0.729402913 | 7.213589769  |
| O  | 0.619436065 | 3.070618853 | 8.640189324  |
| O  | 4.996328670 | 1.133265320 | 10.084131025 |
| O  | 0.688258857 | 2.840066260 | 11.284765447 |
| Al | 3.492182131 | 4.894828730 | 8.474550964  |
| Al | 7.760112081 | 7.115558309 | 7.221059953  |
| O  | 0.765865304 | 7.189405571 | 11.288313757 |
| O  | 4.844279639 | 4.931432360 | 9.931116725  |
| O  | 0.776729890 | 6.851773813 | 8.474549458  |
| O  | 4.913917157 | 5.084285155 | 7.274593983  |

|    |              |             |              |
|----|--------------|-------------|--------------|
| Al | 6.241502667  | 0.945641893 | 8.613728122  |
| Al | 6.286881518  | 0.833317150 | 11.439175314 |
| Al | 6.320158079  | 5.913620717 | 9.924564253  |
| O  | 6.544769930  | 7.015520420 | 11.354927006 |
| O  | 6.370731155  | 7.091642432 | 8.553026047  |
| Al | 2.076191559  | 7.020770646 | 9.909779625  |
| Al | 2.098513050  | 6.875537501 | 7.077763827  |
| Al | 2.047552819  | 2.052696544 | 8.573298707  |
| O  | 2.187110685  | 0.954789038 | 7.126936869  |
| O  | 2.102630749  | 0.876297759 | 9.928689764  |
| Al | 2.073499078  | 3.950443261 | 11.383441906 |
| O  | 2.097444895  | 5.087494990 | 9.919689784  |
| O  | 2.043908665  | 5.011831716 | 7.286786430  |
| Al | 6.228318166  | 3.929430475 | 7.194273394  |
| O  | 6.261246292  | 2.858154336 | 8.656140951  |
| O  | 6.300935781  | 2.912910037 | 11.276983065 |
| H  | 1.917097540  | 1.379639780 | 6.298113558  |
| H  | 4.109853559  | 1.141481913 | 7.279572156  |
| H  | 7.337437678  | 1.402258154 | 6.543127427  |
| H  | 6.275841039  | 7.680824634 | 5.358489568  |
| H  | 3.578181291  | 6.201082721 | 5.335537714  |
| H  | 0.621392459  | 7.610163897 | 5.215602538  |
| H  | 5.881154755  | 2.437832679 | 5.413592518  |
| H  | 8.284538858  | 4.724715473 | 6.333883336  |
| O  | 6.322872830  | 6.946397491 | 5.989227981  |
| O  | 3.507286892  | 7.022318584 | 5.851085532  |
| O  | 0.627755319  | 6.947483587 | 5.919898382  |
| O  | 6.606432807  | 2.978333051 | 5.765793745  |
| Al | 9.172125254  | 4.912863475 | 8.578414800  |
| Al | 13.303939833 | 7.051983151 | 7.310637103  |
| O  | 11.683320822 | 7.260930320 | 11.435724058 |
| O  | 16.119302400 | 4.908694038 | 9.837583244  |
| O  | 11.826720419 | 6.931408713 | 8.557956687  |
| O  | 16.118751474 | 5.062041942 | 7.190951367  |
| Al | 13.201013089 | 3.107212451 | 10.119666213 |
| Al | 9.073407974  | 1.033216321 | 11.340242678 |
| O  | 15.977596048 | 0.890644209 | 7.432786266  |
| O  | 11.931099306 | 3.121007419 | 8.736220835  |
| O  | 15.949552363 | 1.130955657 | 10.170935165 |
| O  | 11.908473530 | 2.906748237 | 11.437741603 |
| Al | 16.187198261 | 3.058071437 | 10.027415570 |
| Al | 11.892959129 | 1.026107089 | 11.448231166 |
| O  | 13.249294107 | 0.792197041 | 7.508882750  |
| O  | 9.117628996  | 3.064165546 | 8.638520405  |
| O  | 13.394421343 | 1.188996127 | 10.239089491 |
| O  | 9.047564045  | 2.899180294 | 11.283322030 |
| Al | 11.932931825 | 4.957947659 | 8.571821535  |
| Al | 16.155391894 | 7.134646285 | 7.295882222  |
| O  | 13.246701518 | 4.931361118 | 9.999543675  |
| O  | 9.179396764  | 6.863666948 | 8.480892404  |
| O  | 13.321011660 | 5.165062828 | 7.355959668  |
| Al | 14.636904546 | 0.985282877 | 8.757804541  |
| Al | 14.691226068 | 0.889528932 | 11.576107315 |
| Al | 14.682086612 | 5.945694378 | 10.027939300 |
| O  | 14.959220847 | 7.025003904 | 11.443133239 |
| O  | 14.744579811 | 7.118005056 | 8.637289908  |
| Al | 10.507207634 | 7.093992512 | 9.958391107  |
| Al | 10.550176789 | 6.952995810 | 7.137866296  |
| Al | 10.567134767 | 2.020578755 | 8.562364874  |
| O  | 10.346828073 | 0.876189967 | 7.191991482  |
| O  | 10.515553005 | 0.885051246 | 10.009318278 |

|    |              |              |              |
|----|--------------|--------------|--------------|
| Al | 10.473978434 | 3.926940777  | 11.328538909 |
| O  | 10.500318400 | 5.155838825  | 9.991319543  |
| O  | 10.524132537 | 5.086194147  | 7.347904192  |
| Al | 14.582642936 | 3.972915023  | 7.342851921  |
| O  | 14.654551402 | 2.901307454  | 8.791217668  |
| O  | 14.725818859 | 2.985562149  | 11.380316681 |
| H  | 9.365902435  | 0.993805714  | 7.073639137  |
| H  | 13.373355627 | 1.365003304  | 6.727857678  |
| H  | 15.714017216 | 1.432142824  | 6.658173445  |
| H  | 14.645963113 | 7.783357194  | 5.467735644  |
| H  | 12.095671657 | 6.234662817  | 5.479470627  |
| H  | 9.078013163  | 6.663122818  | 5.103796802  |
| H  | 14.363119971 | 3.114339748  | 5.119250891  |
| H  | 16.603852332 | 4.895684723  | 6.355859680  |
| O  | 14.729120176 | 7.026383685  | 6.066562778  |
| O  | 11.983784772 | 7.086578325  | 5.935903188  |
| O  | 9.116577237  | 7.174597618  | 5.922887393  |
| O  | 14.646918104 | 2.831598000  | 5.999387595  |
| Al | 0.733590521  | 12.989895075 | 8.556967247  |
| Al | 4.870236409  | 14.988613064 | 7.071168879  |
| O  | 3.505418659  | 15.252042876 | 11.052756747 |
| O  | 7.695499796  | 12.981235682 | 9.755484207  |
| O  | 3.409039128  | 14.866553179 | 8.322234618  |
| O  | 7.724027444  | 12.994336059 | 7.051719862  |
| Al | 4.797121125  | 11.112607620 | 9.977000098  |
| Al | 0.724201351  | 9.150488297  | 11.447453000 |
| O  | 7.640765058  | 8.940734198  | 7.373782082  |
| O  | 3.504779244  | 11.045611467 | 8.564203746  |
| O  | 7.625314933  | 9.270389256  | 10.162744088 |
| O  | 3.520305748  | 10.932796443 | 11.271918636 |
| Al | 7.782134140  | 11.172658404 | 10.013411903 |
| Al | 3.549701406  | 9.067417092  | 11.374537752 |
| O  | 4.995937524  | 8.858609660  | 7.357284461  |
| O  | 0.617258808  | 11.175348065 | 8.713109559  |
| O  | 5.060170408  | 9.188708703  | 10.156098292 |
| O  | 0.711917757  | 11.045330866 | 11.373287495 |
| Al | 3.495044036  | 12.908285051 | 8.369598359  |
| Al | 7.701080885  | 15.088652116 | 7.137562445  |
| O  | 0.794502455  | 15.238664634 | 11.129140491 |
| O  | 4.826706332  | 12.916230325 | 9.766936882  |
| O  | 0.776823016  | 14.922083595 | 8.381937441  |
| O  | 4.899922585  | 13.075557412 | 7.122505535  |
| Al | 6.330359794  | 9.031082892  | 8.702684608  |
| Al | 6.330359429  | 8.959350458  | 11.528629649 |
| Al | 6.218365682  | 13.972598407 | 9.853661260  |
| O  | 6.481573023  | 15.027194632 | 11.284634782 |
| O  | 6.301811438  | 15.109807050 | 8.443485199  |
| Al | 2.162153724  | 15.086876244 | 9.809111105  |
| Al | 2.094691941  | 14.916760004 | 6.983427838  |
| Al | 1.992028155  | 10.091906384 | 8.602277915  |
| O  | 2.110179267  | 8.950998196  | 7.192976132  |
| O  | 2.044331488  | 8.951865590  | 10.006602642 |
| Al | 2.169949285  | 12.081009140 | 11.356321920 |
| O  | 2.106162196  | 13.155108984 | 9.836300708  |
| O  | 2.024792052  | 13.058152534 | 7.207012792  |
| Al | 6.204505740  | 11.910375462 | 7.186801006  |
| O  | 6.283333912  | 10.918891602 | 8.701412237  |
| O  | 6.305026784  | 11.065144837 | 11.290730647 |
| H  | 2.399017374  | 9.350875676  | 6.357513907  |
| H  | 4.180219982  | 9.330125078  | 7.609254912  |
| H  | 7.398125067  | 9.548337232  | 6.633831566  |

|    |              |              |              |
|----|--------------|--------------|--------------|
| H  | 6.348325647  | 14.257457019 | 5.255698711  |
| H  | 3.515851520  | 14.173743682 | 5.261047963  |
| H  | 0.570112639  | 15.653695015 | 5.077043854  |
| H  | 5.718817881  | 10.279016896 | 5.652628207  |
| H  | 8.283481174  | 12.770633513 | 6.279118055  |
| O  | 6.317772390  | 15.019479784 | 5.851579370  |
| O  | 3.493158539  | 15.011381961 | 5.753475123  |
| O  | 0.618837303  | 15.084010511 | 5.855390155  |
| O  | 6.464981955  | 10.892934128 | 5.768657514  |
| Al | 9.142504893  | 12.967243296 | 8.538036280  |
| Al | 13.257117752 | 15.073872843 | 7.220457403  |
| O  | 11.840467893 | 15.264467178 | 11.274889613 |
| O  | 16.134469092 | 13.068436817 | 9.904394544  |
| O  | 11.776995698 | 14.919261621 | 8.469093497  |
| O  | 16.129387856 | 13.078577146 | 7.184127807  |
| Al | 13.232111963 | 11.160799112 | 10.117354072 |
| Al | 9.080714768  | 9.186985794  | 11.394438107 |
| O  | 16.118298748 | 8.948922271  | 7.521373115  |
| O  | 11.965012538 | 11.079000007 | 8.706841775  |
| O  | 16.026038432 | 9.275380939  | 10.254639725 |
| O  | 11.927895935 | 10.973308937 | 11.423829499 |
| Al | 16.208013585 | 11.203696484 | 10.119181273 |
| Al | 11.977586260 | 9.100937326  | 11.448127375 |
| O  | 13.467707837 | 8.936067472  | 7.436164222  |
| O  | 9.050870292  | 11.139642322 | 8.646592849  |
| O  | 13.471108190 | 9.212176912  | 10.252841269 |
| O  | 9.105077689  | 11.047276717 | 11.352543057 |
| Al | 11.916913573 | 12.950066076 | 8.487147466  |
| Al | 16.137505179 | 15.223497348 | 7.236101487  |
| O  | 9.127644483  | 15.249763564 | 11.198900778 |
| O  | 13.236592652 | 12.979842883 | 9.918853126  |
| O  | 9.123480227  | 14.861341153 | 8.394920011  |
| O  | 13.323019868 | 13.156227671 | 7.275236584  |
| Al | 14.758586922 | 9.069270262  | 8.808846992  |
| Al | 14.753407754 | 8.932921028  | 11.629593707 |
| Al | 14.643392120 | 14.022769639 | 9.955793154  |
| O  | 14.493873040 | 15.084775950 | 11.420517370 |
| O  | 14.720057644 | 15.169386171 | 8.569148186  |
| Al | 10.521775583 | 15.096928727 | 9.870279212  |
| Al | 10.496414046 | 14.971700011 | 7.056546158  |
| Al | 10.470116438 | 10.119899330 | 8.647388686  |
| O  | 10.529839212 | 8.961758572  | 7.268938098  |
| O  | 10.511253387 | 9.027246088  | 10.076999811 |
| Al | 10.540863572 | 12.080514001 | 11.366753011 |
| O  | 10.508012480 | 13.167037145 | 9.912288594  |
| O  | 10.506684912 | 13.069416958 | 7.284192507  |
| Al | 14.621822852 | 11.983835647 | 7.313824611  |
| O  | 14.715246072 | 10.980735440 | 8.818470290  |
| O  | 14.720347551 | 11.124189806 | 11.419836802 |
| H  | 9.946006959  | 9.249680430  | 6.546361127  |
| H  | 12.654724021 | 9.457144974  | 7.567342785  |
| H  | 15.958683172 | 9.610417017  | 6.810378326  |
| H  | 14.725453658 | 14.452410077 | 5.346636077  |
| H  | 11.956598394 | 14.230257428 | 5.392113470  |
| H  | 9.048732330  | 15.584771815 | 5.114920299  |
| H  | 14.240078016 | 10.319768496 | 5.791006075  |
| H  | 16.663861153 | 12.828335724 | 6.399611929  |
| O  | 14.719722737 | 15.166736765 | 6.000192895  |
| O  | 11.919961469 | 15.083823227 | 5.857482803  |
| O  | 9.052420641  | 14.940902461 | 5.838578380  |
| O  | 14.952332310 | 10.971077240 | 5.918734834  |

|   |              |              |              |
|---|--------------|--------------|--------------|
| O | 7.716498756  | 9.118715045  | 12.720694094 |
| H | 7.880667835  | 8.373877937  | 13.335210132 |
| H | 14.654575717 | 11.742452720 | 12.164165762 |
| O | 13.326475824 | 9.026067427  | 12.795120620 |
| O | 10.507713719 | 9.034834403  | 12.717440687 |
| O | -0.626004913 | 9.030597932  | 12.794503997 |
| H | -0.587160219 | 9.778821190  | 13.407900105 |
| O | 2.415586985  | 13.234884593 | 12.650162463 |
| O | 10.587076566 | 13.313568304 | 12.651239183 |
| H | 7.487769798  | 14.962478579 | 11.322212523 |
| H | 13.498127279 | 15.002590951 | 11.541371387 |
| H | 3.345828429  | 14.593940922 | 11.774764652 |
| H | 11.531258700 | 14.711673532 | 12.035968078 |
| O | 1.873634188  | 5.002654708  | 12.792106111 |
| H | 7.548873087  | 6.946463709  | 11.480727451 |
| H | 4.139057516  | 6.552807127  | 11.087419656 |
| H | 15.967795416 | 6.952083065  | 11.500290312 |
| O | 7.701636514  | 0.967065850  | 12.639038049 |
| H | 7.780687604  | 0.313059481  | 13.346670232 |
| O | -0.697711230 | 0.887268030  | 12.713351571 |
| H | -0.619775768 | 0.109707056  | 13.286452094 |
| H | 6.341119462  | 3.454137878  | 12.081338867 |
| O | 4.901672985  | 0.817108039  | 12.641104072 |
| O | 2.097961770  | 0.882107043  | 12.563603136 |
| H | 14.817793005 | 3.594172105  | 12.131356429 |
| O | 13.258432755 | 0.892998957  | 12.787859020 |
| O | 10.439223796 | 0.962821192  | 12.642297886 |
| O | 2.171731162  | 9.114793692  | 12.641225740 |
| O | 4.911462912  | 8.946157775  | 12.704358060 |
| H | 2.172636465  | 8.324909469  | 13.203289118 |
| H | 4.858866455  | 9.666527659  | 13.349247830 |
| H | 13.178272297 | 8.222184892  | 13.332149881 |
| H | 10.495670126 | 9.627875253  | 13.484178702 |
| H | 13.245696152 | 1.630998268  | 13.414782194 |
| H | 10.379256948 | 1.706644212  | 13.260696589 |
| H | 2.092982697  | 1.623374879  | 13.189192921 |
| H | 4.807825249  | -0.010106608 | 13.137454861 |
| H | 9.450675957  | 14.747121636 | 11.981910951 |
| H | 10.677174740 | 13.054858685 | 13.578266989 |
| H | 1.715635668  | 13.910302503 | 12.694281213 |
| H | 0.063800505  | 14.624961154 | 10.933138657 |
| H | 1.071757422  | 6.577661689  | 12.008400215 |
| H | 2.696281683  | 5.431611256  | 13.074935675 |
| H | 6.296773272  | 11.683302666 | 12.038718067 |
| W | 10.405074163 | 6.696494402  | 12.899872521 |
| O | 10.363773429 | 4.917640966  | 12.864468421 |
| O | 9.202504427  | 7.264827166  | 11.371035673 |
| H | 11.830370151 | 7.042735534  | 13.833094783 |
| C | 9.345292293  | 7.162741615  | 14.452337705 |
| H | 9.270658112  | 8.162335613  | 14.912064155 |
| C | 8.581753871  | 6.133567238  | 15.284961221 |
| H | 8.743936855  | 5.127771793  | 14.867656250 |
| C | 9.081149839  | 6.137722895  | 16.737920198 |
| H | 8.922578569  | 7.124806171  | 17.199510697 |
| H | 8.541117538  | 5.392483724  | 17.341603706 |
| H | 10.154830019 | 5.911899917  | 16.785591626 |
| C | 7.072112372  | 6.430420906  | 15.213460059 |
| H | 6.699879377  | 6.383765473  | 14.180076261 |
| H | 6.502677971  | 5.705717353  | 15.815555469 |
| H | 6.851322061  | 7.435796755  | 15.605930382 |



**Species 2a. E: -2322.4692045853**

|    |              |             |              |
|----|--------------|-------------|--------------|
| Al | 0.724976075  | 4.903254672 | 8.589460405  |
| Al | 4.875489679  | 6.972836359 | 7.212546561  |
| O  | 3.415467576  | 7.190854219 | 11.207052825 |
| O  | 7.711326461  | 4.853250429 | 9.762339699  |
| O  | 3.405232507  | 6.845677979 | 8.454481495  |
| O  | 7.782389837  | 5.006991007 | 7.123302477  |
| Al | 4.785904675  | 3.070181481 | 10.031872620 |
| Al | 0.662985573  | 0.965928942 | 11.342189362 |
| O  | 7.629702510  | 0.808286369 | 7.279856756  |
| O  | 3.511758619  | 3.061431766 | 8.644627533  |
| O  | 7.570651452  | 1.125701907 | 10.079792860 |
| O  | 3.508476264  | 2.884008644 | 11.349178003 |
| Al | 7.775602802  | 3.022604160 | 9.935352423  |
| Al | 3.510982556  | 0.974610475 | 11.336374037 |
| O  | 4.993358577  | 0.729298520 | 7.213552637  |
| O  | 0.619391966  | 3.070620817 | 8.640213345  |
| O  | 4.996000660  | 1.133098190 | 10.084118948 |
| O  | 0.688294771  | 2.840031107 | 11.284822145 |
| Al | 3.492116207  | 4.894757264 | 8.474502081  |
| Al | 7.760352817  | 7.116323498 | 7.220999256  |
| O  | 0.765836519  | 7.189406589 | 11.288241869 |
| O  | 4.844064758  | 4.931308524 | 9.930884294  |
| O  | 0.776698700  | 6.851731505 | 8.474485447  |
| O  | 4.913812692  | 5.084234859 | 7.274506712  |
| Al | 6.241450559  | 0.945281275 | 8.613907124  |
| Al | 6.286810343  | 0.833193095 | 11.439112984 |
| Al | 6.320185994  | 5.913284518 | 9.924309839  |
| O  | 6.544671508  | 7.015554441 | 11.354436314 |
| O  | 6.370540044  | 7.091706521 | 8.552816936  |
| Al | 2.075696414  | 7.020497884 | 9.909516870  |
| Al | 2.098456186  | 6.875427310 | 7.077669078  |
| Al | 2.047419114  | 2.052643383 | 8.573300168  |
| O  | 2.187069707  | 0.954702656 | 7.126948815  |
| O  | 2.102625193  | 0.876233123 | 9.928674722  |
| Al | 2.073354137  | 3.950293015 | 11.383265766 |
| O  | 2.097386382  | 5.087483037 | 9.919645624  |
| O  | 2.043809464  | 5.011805275 | 7.286763470  |
| Al | 6.227994187  | 3.929208139 | 7.194336611  |
| O  | 6.260549906  | 2.857474275 | 8.655736881  |
| O  | 6.300687332  | 2.912811739 | 11.276627315 |
| H  | 1.917983875  | 1.379761261 | 6.297932698  |
| H  | 4.109843409  | 1.141378970 | 7.279892846  |
| H  | 7.337289722  | 1.402184799 | 6.543130204  |
| H  | 6.276062709  | 7.680273273 | 5.357865810  |
| H  | 3.578211972  | 6.200924536 | 5.335675669  |
| H  | 0.621240435  | 7.610483486 | 5.215883656  |
| H  | 5.881113335  | 2.437506409 | 5.413848477  |
| H  | 8.283338351  | 4.724963331 | 6.332517135  |
| O  | 6.322937889  | 6.946363830 | 5.989195268  |
| O  | 3.507307116  | 7.022279227 | 5.851033594  |
| O  | 0.627714309  | 6.947513218 | 5.919903032  |
| O  | 6.606311946  | 2.978343410 | 5.765719154  |
| Al | 9.171726458  | 4.913214874 | 8.574441378  |
| Al | 13.303674048 | 7.052200243 | 7.310715637  |
| O  | 11.684413319 | 7.259761600 | 11.438430662 |
| O  | 16.119141512 | 4.908757321 | 9.837585847  |
| O  | 11.826955470 | 6.931703825 | 8.557647459  |
| O  | 16.118759538 | 5.061976351 | 7.190925519  |
| Al | 13.201830180 | 3.106275969 | 10.118864885 |
| Al | 9.073428530  | 1.033113180 | 11.339839103 |

|    |              |              |              |
|----|--------------|--------------|--------------|
| O  | 15.977620874 | 0.890578625  | 7.432787951  |
| O  | 11.930465573 | 3.120294962  | 8.735826119  |
| O  | 15.949996521 | 1.130921431  | 10.170897631 |
| O  | 11.909983421 | 2.904518531  | 11.435698694 |
| Al | 16.187197694 | 3.058150867  | 10.027569283 |
| Al | 11.893230037 | 1.025660238  | 11.447756148 |
| O  | 13.249297376 | 0.792138858  | 7.508724476  |
| O  | 9.117921217  | 3.063923307  | 8.637963832  |
| O  | 13.395068513 | 1.186780480  | 10.238448284 |
| O  | 9.047148510  | 2.897369607  | 11.281210521 |
| Al | 11.931808096 | 4.958097963  | 8.569557695  |
| Al | 16.155169504 | 7.134569361  | 7.295981882  |
| O  | 13.246295536 | 4.930724181  | 9.999072847  |
| O  | 9.178849101  | 6.863975053  | 8.480369984  |
| O  | 13.321086568 | 5.165006456  | 7.355717868  |
| Al | 14.636990496 | 0.984788712  | 8.757950463  |
| Al | 14.691259443 | 0.889245800  | 11.575980561 |
| Al | 14.681138338 | 5.945394309  | 10.028126536 |
| O  | 14.959223520 | 7.024916668  | 11.443098167 |
| O  | 14.744452587 | 7.117951784  | 8.637342738  |
| Al | 10.507355800 | 7.091161555  | 9.960593619  |
| Al | 10.550197737 | 6.953479234  | 7.137627839  |
| Al | 10.567011436 | 2.019273211  | 8.560939364  |
| O  | 10.346348388 | 0.875492661  | 7.191197445  |
| O  | 10.515534657 | 0.884659299  | 10.008537927 |
| Al | 10.476652121 | 3.922278535  | 11.306215652 |
| O  | 10.499562812 | 5.155683563  | 9.978937004  |
| O  | 10.524191429 | 5.086679581  | 7.343734855  |
| Al | 14.582645599 | 3.972945072  | 7.342902468  |
| O  | 14.654557364 | 2.901056161  | 8.791076177  |
| O  | 14.725840370 | 2.985341185  | 11.379680431 |
| H  | 9.365334755  | 0.993064806  | 7.073076710  |
| H  | 13.373789404 | 1.364781855  | 6.727640946  |
| H  | 15.713955584 | 1.432131443  | 6.658244712  |
| H  | 14.645802478 | 7.783038892  | 5.467495625  |
| H  | 12.095165736 | 6.234481859  | 5.480104143  |
| H  | 9.078418400  | 6.660845355  | 5.104990425  |
| H  | 14.362651638 | 3.114537228  | 5.119454758  |
| H  | 16.603767167 | 4.895635556  | 6.355784609  |
| O  | 14.729124306 | 7.026342753  | 6.066639571  |
| O  | 11.984084417 | 7.087060125  | 5.935538433  |
| O  | 9.116436766  | 7.174881461  | 5.922516971  |
| O  | 14.646939750 | 2.831601521  | 5.999375129  |
| Al | 0.733544954  | 12.989711060 | 8.557038705  |
| Al | 4.870195109  | 14.988602899 | 7.071023874  |
| O  | 3.505442997  | 15.252002956 | 11.052701907 |
| O  | 7.695308719  | 12.981194919 | 9.755470698  |
| O  | 3.409087718  | 14.866372579 | 8.322270649  |
| O  | 7.723979287  | 12.994282968 | 7.051664293  |
| Al | 4.796941040  | 11.111921350 | 9.976836068  |
| Al | 0.723964933  | 9.150475562  | 11.447301579 |
| O  | 7.640604300  | 8.941133649  | 7.373749871  |
| O  | 3.504671357  | 11.045511945 | 8.564285972  |
| O  | 7.624832781  | 9.270626995  | 10.162171066 |
| O  | 3.520023265  | 10.929923410 | 11.271953930 |
| Al | 7.781595847  | 11.172879408 | 10.013263604 |
| Al | 3.549514687  | 9.065788499  | 11.373623193 |
| O  | 4.995764792  | 8.858641069  | 7.357133759  |
| O  | 0.617161976  | 11.175008807 | 8.713122396  |
| O  | 5.060321832  | 9.188367690  | 10.155916540 |
| O  | 0.711916038  | 11.045260392 | 11.373277249 |

|    |              |              |              |
|----|--------------|--------------|--------------|
| Al | 3.494951303  | 12.908217045 | 8.369621319  |
| Al | 7.701062225  | 15.088544378 | 7.137435210  |
| O  | 0.794607066  | 15.238520716 | 11.129247725 |
| O  | 4.826588937  | 12.915906702 | 9.767189221  |
| O  | 0.776872535  | 14.922035140 | 8.382026186  |
| O  | 4.899823039  | 13.075523554 | 7.122498767  |
| Al | 6.329992208  | 9.031072384  | 8.702290495  |
| Al | 6.330665081  | 8.955966808  | 11.528476108 |
| Al | 6.218153414  | 13.972592102 | 9.853457627  |
| O  | 6.481365130  | 15.026799626 | 11.284617358 |
| O  | 6.301711350  | 15.109363688 | 8.442941280  |
| Al | 2.162137574  | 15.086837069 | 9.809147817  |
| Al | 2.094664203  | 14.916696867 | 6.983505124  |
| Al | 1.991878791  | 10.091689520 | 8.602179030  |
| O  | 2.110220643  | 8.950979406  | 7.192904444  |
| O  | 2.044083607  | 8.951572009  | 10.006454104 |
| Al | 2.170430816  | 12.080173930 | 11.356175101 |
| O  | 2.106242353  | 13.154892921 | 9.836394962  |
| O  | 2.024753307  | 13.058062380 | 7.207017859  |
| Al | 6.204393066  | 11.910447119 | 7.186621046  |
| O  | 6.282710125  | 10.919110486 | 8.701341818  |
| O  | 6.305275104  | 11.064721991 | 11.291416821 |
| H  | 2.398541485  | 9.350964596  | 6.357320020  |
| H  | 4.179834603  | 9.329886959  | 7.608873651  |
| H  | 7.398500698  | 9.548800879  | 6.633724407  |
| H  | 6.348297757  | 14.257326426 | 5.255607924  |
| H  | 3.515727712  | 14.173627062 | 5.261161953  |
| H  | 0.570220761  | 15.654312868 | 5.077497547  |
| H  | 5.719107019  | 10.278471389 | 5.653171008  |
| H  | 8.283540541  | 12.770486039 | 6.279163801  |
| O  | 6.317720104  | 15.019408580 | 5.851405920  |
| O  | 3.493089329  | 15.011359471 | 5.753433750  |
| O  | 0.618864047  | 15.083987275 | 5.855378439  |
| O  | 6.464939212  | 10.892930082 | 5.768604684  |
| Al | 9.142518078  | 12.967195375 | 8.538024602  |
| Al | 13.257096629 | 15.073836684 | 7.220473346  |
| O  | 11.840415865 | 15.264146186 | 11.274919694 |
| O  | 16.134478858 | 13.068394083 | 9.904363050  |
| O  | 11.776959904 | 14.919179062 | 8.468975503  |
| O  | 16.129407077 | 13.078551323 | 7.184142493  |
| Al | 13.231888097 | 11.160642220 | 10.117224163 |
| Al | 9.081766307  | 9.185843538  | 11.388428641 |
| O  | 16.118328020 | 8.948880536  | 7.521425856  |
| O  | 11.964084317 | 11.079155752 | 8.706873854  |
| O  | 16.025792732 | 9.275377073  | 10.254757066 |
| O  | 11.927804463 | 10.973386062 | 11.423570593 |
| Al | 16.207765674 | 11.203666796 | 10.119269577 |
| Al | 11.977815236 | 9.100730333  | 11.448442353 |
| O  | 13.467880407 | 8.936462901  | 7.436099940  |
| O  | 9.050676703  | 11.139569288 | 8.646663842  |
| O  | 13.470923158 | 9.212065317  | 10.252801777 |
| O  | 9.105040397  | 11.046846326 | 11.352490371 |
| Al | 11.916846104 | 12.950059558 | 8.487193932  |
| Al | 16.137499588 | 15.223454014 | 7.236109264  |
| O  | 9.127576224  | 15.249728863 | 11.198832139 |
| O  | 13.236554280 | 12.979763367 | 9.918783464  |
| O  | 9.123379165  | 14.861199387 | 8.394838049  |
| O  | 13.323004068 | 13.156198187 | 7.275240287  |
| Al | 14.758533718 | 9.069074688  | 8.808916448  |
| Al | 14.753084941 | 8.932336128  | 11.629822097 |
| Al | 14.643335590 | 14.022755313 | 9.955883631  |

|    |              |              |              |
|----|--------------|--------------|--------------|
| O  | 14.494006999 | 15.084493360 | 11.420807033 |
| O  | 14.720152855 | 15.169223370 | 8.569088663  |
| Al | 10.521706469 | 15.096942130 | 9.870254216  |
| Al | 10.496345597 | 14.971376630 | 7.056389229  |
| Al | 10.469806722 | 10.119405958 | 8.646431751  |
| O  | 10.530105674 | 8.961906690  | 7.268017990  |
| O  | 10.511263353 | 9.025933720  | 10.075558725 |
| Al | 10.540857963 | 12.080585283 | 11.366403218 |
| O  | 10.507895693 | 13.167103240 | 9.912199808  |
| O  | 10.506625824 | 13.069366669 | 7.284127254  |
| Al | 14.621817458 | 11.983803230 | 7.313864323  |
| O  | 14.715129666 | 10.980708143 | 8.818504722  |
| O  | 14.720290395 | 11.124242477 | 11.419867902 |
| H  | 9.949532533  | 9.250524417  | 6.543148859  |
| H  | 12.654685352 | 9.457094890  | 7.567690590  |
| H  | 15.958763042 | 9.610424449  | 6.810481836  |
| H  | 14.725438433 | 14.452059448 | 5.346900448  |
| H  | 11.956754766 | 14.230099990 | 5.392125351  |
| H  | 9.048697317  | 15.584747295 | 5.114945828  |
| H  | 14.240365009 | 10.319128698 | 5.792044925  |
| H  | 16.663874510 | 12.828240778 | 6.399648967  |
| O  | 14.719733110 | 15.166647623 | 6.000175533  |
| O  | 11.919959857 | 15.083741606 | 5.857344300  |
| O  | 9.052295593  | 14.940705662 | 5.838449667  |
| O  | 14.952273723 | 10.971071237 | 5.918729900  |
| O  | 7.718638202  | 9.115950434  | 12.722663952 |
| H  | 7.901582237  | 8.357392336  | 13.313342476 |
| H  | 14.654136302 | 11.742909715 | 12.163823139 |
| O  | 13.326483273 | 9.025912057  | 12.795437822 |
| O  | 10.507404779 | 9.034966908  | 12.711010591 |
| O  | -0.625997649 | 9.030616267  | 12.794570642 |
| H  | -0.587443891 | 9.779786910  | 13.406830105 |
| O  | 2.415739665  | 13.234526631 | 12.649939460 |
| O  | 10.586959663 | 13.313388542 | 12.651251978 |
| H  | 7.487576818  | 14.962292063 | 11.322180721 |
| H  | 13.498250268 | 15.002457121 | 11.541594203 |
| H  | 3.346156968  | 14.593849936 | 11.774669540 |
| H  | 11.531198585 | 14.711785421 | 12.036259491 |
| O  | 1.873689336  | 5.002793444  | 12.791956073 |
| H  | 7.549905520  | 6.946587394  | 11.476438745 |
| H  | 4.139190240  | 6.552413030  | 11.085830114 |
| H  | 15.967765748 | 6.952014845  | 11.499635731 |
| O  | 7.701544598  | 0.967115495  | 12.638881866 |
| H  | 7.781212219  | 0.313575848  | 13.346862017 |
| O  | -0.697661291 | 0.887213571  | 12.713337000 |
| H  | -0.619840660 | 0.109501473  | 13.286243983 |
| H  | 6.339171089  | 3.455294921  | 12.080101361 |
| O  | 4.901637498  | 0.817104485  | 12.641091878 |
| O  | 2.097968021  | 0.882083076  | 12.563591010 |
| H  | 14.815456291 | 3.594366317  | 12.130665531 |
| O  | 13.258649594 | 0.892938501  | 12.787721505 |
| O  | 10.439280754 | 0.963097843  | 12.642112276 |
| O  | 2.171719263  | 9.114562072  | 12.641144517 |
| O  | 4.911524653  | 8.946909347  | 12.705435164 |
| H  | 2.171419821  | 8.324479287  | 13.202910457 |
| H  | 4.856836126  | 9.677817184  | 13.338474186 |
| H  | 13.175647902 | 8.220221922  | 13.329632038 |
| H  | 10.467283652 | 9.639199204  | 13.467946057 |
| H  | 13.244997756 | 1.631741741  | 13.413693913 |
| H  | 10.380072059 | 1.711966488  | 13.254657491 |
| H  | 2.093002830  | 1.623440927  | 13.189071863 |

|   |              |              |              |
|---|--------------|--------------|--------------|
| H | 4.807801924  | -0.010004830 | 13.137596620 |
| H | 9.450645892  | 14.747185058 | 11.981874536 |
| H | 10.674127967 | 13.054115794 | 13.578415181 |
| H | 1.715855163  | 13.910159612 | 12.692680725 |
| H | 0.063840485  | 14.624924453 | 10.933103576 |
| H | 1.070720029  | 6.576930669  | 12.008113811 |
| H | 2.696222176  | 5.435680351  | 13.069227218 |
| H | 6.297270146  | 11.685163371 | 12.037559486 |
| W | 10.404477292 | 6.706748833  | 12.904306959 |
| O | 10.363234409 | 4.925854921  | 12.805254785 |
| O | 9.196956262  | 7.266530885  | 11.374976748 |
| H | 11.831186879 | 7.048427844  | 13.839557691 |
| C | 9.442894019  | 7.153054013  | 14.539435228 |
| C | 8.606410448  | 6.002893195  | 15.109466196 |
| H | 7.571773244  | 6.353109107  | 15.277533253 |
| H | 8.546687177  | 5.118736714  | 14.465638483 |
| H | 9.002898071  | 5.689136777  | 16.091252317 |
| C | 9.454417729  | 8.327307683  | 15.486057130 |
| H | 8.482516686  | 8.851127006  | 15.514474381 |
| H | 9.649815283  | 7.981297153  | 16.516057749 |
| H | 10.230822967 | 9.070776190  | 15.258730051 |

**Species 2b. E: -2322.4678374438**

|    |             |             |              |
|----|-------------|-------------|--------------|
| Al | 0.725345204 | 4.903344753 | 8.589584697  |
| Al | 4.875521067 | 6.972816360 | 7.212539886  |
| O  | 3.415556612 | 7.191469986 | 11.207271086 |
| O  | 7.711415237 | 4.853551635 | 9.762766713  |
| O  | 3.405306818 | 6.845754798 | 8.454427208  |
| O  | 7.782568128 | 5.007300863 | 7.123872696  |
| Al | 4.786136167 | 3.070263631 | 10.032238977 |
| Al | 0.663029208 | 0.965981162 | 11.342416400 |
| O  | 7.629704195 | 0.808396862 | 7.279810680  |
| O  | 3.512004248 | 3.061486294 | 8.644729656  |
| O  | 7.571760136 | 1.126117837 | 10.080131138 |
| O  | 3.508445633 | 2.883710213 | 11.349056660 |
| Al | 7.775716205 | 3.023002623 | 9.935639426  |
| Al | 3.511038098 | 0.974424500 | 11.336409838 |
| O  | 4.993423793 | 0.729373812 | 7.213543624  |
| O  | 0.619620336 | 3.070690001 | 8.640347037  |
| O  | 4.996492091 | 1.133095683 | 10.084075927 |
| O  | 0.688195635 | 2.839959517 | 11.284880159 |
| Al | 3.492358227 | 4.894862510 | 8.474752577  |
| Al | 7.759937126 | 7.115799800 | 7.221224355  |
| O  | 0.765799017 | 7.189458149 | 11.288146437 |
| O  | 4.844369999 | 4.931099298 | 9.930793798  |
| O  | 0.776812598 | 6.851845178 | 8.474588497  |
| O  | 4.914025974 | 5.084289290 | 7.274715901  |
| Al | 6.241580119 | 0.945621072 | 8.613687918  |
| Al | 6.286984251 | 0.833412630 | 11.439235567 |
| Al | 6.320216922 | 5.913611919 | 9.924757418  |
| O  | 6.543653752 | 7.015662753 | 11.354460284 |
| O  | 6.370610746 | 7.091645708 | 8.552935743  |
| Al | 2.076627829 | 7.020377865 | 9.909961566  |
| Al | 2.098443194 | 6.875467097 | 7.077594653  |
| Al | 2.047767470 | 2.052562572 | 8.573338814  |
| O  | 2.187201066 | 0.954848588 | 7.126892990  |
| O  | 2.102493346 | 0.876317748 | 9.928865827  |
| Al | 2.073428779 | 3.950175483 | 11.383476777 |
| O  | 2.097433627 | 5.087377238 | 9.919745782  |
| O  | 2.044025126 | 5.011907951 | 7.286929733  |
| Al | 6.228360591 | 3.929351175 | 7.194327213  |

|    |              |             |              |
|----|--------------|-------------|--------------|
| O  | 6.262411815  | 2.858061033 | 8.656012260  |
| O  | 6.300936032  | 2.912791652 | 11.276761966 |
| H  | 1.911759025  | 1.378791650 | 6.299384852  |
| H  | 4.110171333  | 1.142222603 | 7.278245226  |
| H  | 7.336882085  | 1.401956174 | 6.542944126  |
| H  | 6.275887933  | 7.680941348 | 5.358571562  |
| H  | 3.578267519  | 6.200664699 | 5.335773204  |
| H  | 0.620745522  | 7.608755791 | 5.214439117  |
| H  | 5.881132057  | 2.439821889 | 5.411367842  |
| H  | 8.284004027  | 4.725089214 | 6.333511969  |
| O  | 6.322917149  | 6.946348492 | 5.989110178  |
| O  | 3.507310319  | 7.022058922 | 5.851063683  |
| O  | 0.627594473  | 6.947288752 | 5.919829594  |
| O  | 6.606581713  | 2.978714042 | 5.765553356  |
| Al | 9.171991750  | 4.912957031 | 8.577955621  |
| Al | 13.304049382 | 7.051758606 | 7.310374571  |
| O  | 11.683090667 | 7.260656410 | 11.435553673 |
| O  | 16.119288800 | 4.908614495 | 9.837631912  |
| O  | 11.826735571 | 6.931321170 | 8.557905254  |
| O  | 16.118838567 | 5.062061851 | 7.190888434  |
| Al | 13.201184330 | 3.107258359 | 10.119431210 |
| Al | 9.073218279  | 1.033224669 | 11.340096825 |
| O  | 15.977550436 | 0.890792577 | 7.432715338  |
| O  | 11.931090507 | 3.120983965 | 8.736173963  |
| O  | 15.949488491 | 1.130899480 | 10.170924893 |
| O  | 11.908396919 | 2.906800657 | 11.437398670 |
| Al | 16.187206696 | 3.058044338 | 10.027441452 |
| Al | 11.892892936 | 1.025971690 | 11.448413642 |
| O  | 13.249324297 | 0.792188744 | 7.508873400  |
| O  | 9.117645015  | 3.064292992 | 8.638338495  |
| O  | 13.394353907 | 1.189155510 | 10.239123682 |
| O  | 9.047707201  | 2.899224425 | 11.283116577 |
| Al | 11.932845087 | 4.957865843 | 8.571836093  |
| Al | 16.155506528 | 7.134571472 | 7.296053462  |
| O  | 13.246796189 | 4.931350766 | 9.999447187  |
| O  | 9.179334701  | 6.863832490 | 8.480836600  |
| O  | 13.321109705 | 5.165150434 | 7.356086350  |
| Al | 14.637015497 | 0.985316249 | 8.757878297  |
| Al | 14.691214797 | 0.889725408 | 11.576047700 |
| Al | 14.682190000 | 5.945654890 | 10.027900436 |
| O  | 14.959156074 | 7.025012065 | 11.443099537 |
| O  | 14.744678784 | 7.117973966 | 8.637299965  |
| Al | 10.507289225 | 7.093775883 | 9.957925165  |
| Al | 10.550176289 | 6.953095778 | 7.137739497  |
| Al | 10.567045293 | 2.020572386 | 8.562449372  |
| O  | 10.346785807 | 0.876155477 | 7.192040372  |
| O  | 10.515597257 | 0.885113525 | 10.009386680 |
| Al | 10.473917898 | 3.927163340 | 11.329103912 |
| O  | 10.500459552 | 5.155909040 | 9.991555103  |
| O  | 10.524208058 | 5.086284744 | 7.347779941  |
| Al | 14.582727195 | 3.972950697 | 7.342794948  |
| O  | 14.654795381 | 2.901321112 | 8.791065279  |
| O  | 14.725804669 | 2.985640899 | 11.380429817 |
| H  | 9.365850360  | 0.993849295 | 7.073619080  |
| H  | 13.373204399 | 1.365021937 | 6.727863599  |
| H  | 15.713458147 | 1.431870571 | 6.657975645  |
| H  | 14.645968194 | 7.784362646 | 5.468664235  |
| H  | 12.095365730 | 6.235012752 | 5.478819338  |
| H  | 9.077855856  | 6.663263776 | 5.103772539  |
| H  | 14.362101965 | 3.114217144 | 5.119412704  |
| H  | 16.603918375 | 4.895804766 | 6.355773607  |

|    |              |              |              |
|----|--------------|--------------|--------------|
| O  | 14.729176651 | 7.026605376  | 6.066502063  |
| O  | 11.983785343 | 7.086630900  | 5.935822435  |
| O  | 9.116550854  | 7.174681320  | 5.922886444  |
| O  | 14.646951022 | 2.831686107  | 5.999274372  |
| Al | 0.733815286  | 12.987575039 | 8.556591092  |
| Al | 4.870111672  | 14.988760204 | 7.071153308  |
| O  | 3.505285031  | 15.251975309 | 11.052579968 |
| O  | 7.695408509  | 12.981326427 | 9.755431512  |
| O  | 3.408924516  | 14.866298340 | 8.322304339  |
| O  | 7.723996509  | 12.994355041 | 7.051682923  |
| Al | 4.797514976  | 11.112813249 | 9.977164373  |
| Al | 0.724408578  | 9.150443184  | 11.447364696 |
| O  | 7.640799202  | 8.940893546  | 7.373925714  |
| O  | 3.504968595  | 11.045606624 | 8.564445067  |
| O  | 7.625354046  | 9.270415103  | 10.162842959 |
| O  | 3.520622295  | 10.934400374 | 11.272153925 |
| Al | 7.781546349  | 11.172904153 | 10.013476967 |
| Al | 3.549800139  | 9.068185940  | 11.374337652 |
| O  | 4.996083903  | 8.858533878  | 7.357221631  |
| O  | 0.616860783  | 11.170669353 | 8.713056670  |
| O  | 5.060101345  | 9.188766508  | 10.156099645 |
| O  | 0.711865557  | 11.045312185 | 11.373381674 |
| Al | 3.495270267  | 12.908258915 | 8.369742820  |
| Al | 7.701041859  | 15.088670359 | 7.137457185  |
| O  | 0.794391263  | 15.238643540 | 11.129202336 |
| O  | 4.826717702  | 12.916374130 | 9.766899538  |
| O  | 0.776850315  | 14.921908833 | 8.381712026  |
| O  | 4.899938237  | 13.075564788 | 7.122512674  |
| Al | 6.329960008  | 9.030928871  | 8.702960293  |
| Al | 6.330754362  | 8.956674298  | 11.529405007 |
| Al | 6.218281369  | 13.972780066 | 9.853597251  |
| O  | 6.481473450  | 15.027098685 | 11.284703604 |
| O  | 6.301784616  | 15.109734873 | 8.443169578  |
| Al | 2.161633391  | 15.086898189 | 9.808907274  |
| Al | 2.094646614  | 14.916463140 | 6.983597326  |
| Al | 1.993278383  | 10.090637002 | 8.602409834  |
| O  | 2.110418176  | 8.950783392  | 7.192803741  |
| O  | 2.045153250  | 8.951562684  | 10.006839060 |
| Al | 2.169633200  | 12.081418811 | 11.356403449 |
| O  | 2.105948164  | 13.154839116 | 9.836214972  |
| O  | 2.024781278  | 13.057546637 | 7.207092894  |
| Al | 6.204612194  | 11.910459031 | 7.186787639  |
| O  | 6.283327358  | 10.919068003 | 8.701516796  |
| O  | 6.305271912  | 11.065183776 | 11.291014105 |
| H  | 2.395455900  | 9.351263084  | 6.356364777  |
| H  | 4.179943216  | 9.330031587  | 7.607709921  |
| H  | 7.397389449  | 9.548268384  | 6.633987847  |
| H  | 6.348229929  | 14.257333825 | 5.255722803  |
| H  | 3.516171410  | 14.173716844 | 5.261104471  |
| H  | 0.570269192  | 15.651367489 | 5.075514144  |
| H  | 5.718388192  | 10.279835550 | 5.651668106  |
| H  | 8.283663157  | 12.770612785 | 6.279230423  |
| O  | 6.317709101  | 15.019396645 | 5.851559081  |
| O  | 3.493045262  | 15.011390365 | 5.753457788  |
| O  | 0.618869685  | 15.084020077 | 5.855553150  |
| O  | 6.465018309  | 10.892977230 | 5.768599082  |
| Al | 9.142500726  | 12.967294343 | 8.538096410  |
| Al | 13.257136778 | 15.073925104 | 7.220464880  |
| O  | 11.840491148 | 15.264368483 | 11.274945877 |
| O  | 16.134750476 | 13.067812777 | 9.903715802  |
| O  | 11.776998917 | 14.919390253 | 8.469117150  |

|    |              |              |              |
|----|--------------|--------------|--------------|
| O  | 16.129460074 | 13.078276379 | 7.184295071  |
| Al | 13.232028285 | 11.160972086 | 10.117168825 |
| Al | 9.080775688  | 9.187706490  | 11.393119162 |
| O  | 16.118015708 | 8.948705189  | 7.521247866  |
| O  | 11.964267831 | 11.079316512 | 8.706925226  |
| O  | 16.025735930 | 9.275143833  | 10.254845675 |
| O  | 11.927820526 | 10.973282236 | 11.423781791 |
| Al | 16.207918831 | 11.202727236 | 10.119135979 |
| Al | 11.977676058 | 9.101100219  | 11.447934656 |
| O  | 13.467556555 | 8.935826284  | 7.436204039  |
| O  | 9.050710135  | 11.139733997 | 8.646608402  |
| O  | 13.470976035 | 9.212151262  | 10.252839728 |
| O  | 9.105082162  | 11.047349261 | 11.352442392 |
| Al | 11.916731065 | 12.950297594 | 8.487155327  |
| Al | 16.137699901 | 15.223571435 | 7.236333131  |
| O  | 9.127662485  | 15.249790860 | 11.198957023 |
| O  | 13.236487379 | 12.979858692 | 9.919044178  |
| O  | 9.123424621  | 14.861372483 | 8.394996248  |
| O  | 13.323020745 | 13.156291068 | 7.275390763  |
| Al | 14.758492573 | 9.069149630  | 8.808669490  |
| Al | 14.753519347 | 8.932804227  | 11.629577914 |
| Al | 14.643674994 | 14.022464922 | 9.955563014  |
| O  | 14.493957768 | 15.084750972 | 11.420101764 |
| O  | 14.720065065 | 15.169331244 | 8.569154621  |
| Al | 10.521866003 | 15.096932414 | 9.870392017  |
| Al | 10.496203156 | 14.971947784 | 7.056717955  |
| Al | 10.469723995 | 10.119963685 | 8.647199171  |
| O  | 10.529663866 | 8.961725070  | 7.268878038  |
| O  | 10.511308903 | 9.027129851  | 10.076814631 |
| Al | 10.540950722 | 12.080621555 | 11.366640112 |
| O  | 10.507908747 | 13.167275885 | 9.912366107  |
| O  | 10.506675990 | 13.069421293 | 7.284196942  |
| Al | 14.621647303 | 11.983843031 | 7.313792628  |
| O  | 14.715042376 | 10.980603645 | 8.818401540  |
| O  | 14.720318625 | 11.124247110 | 11.419724566 |
| H  | 9.944546142  | 9.248905193  | 6.547016681  |
| H  | 12.654363479 | 9.456555734  | 7.567305681  |
| H  | 15.959157278 | 9.610549726  | 6.810481822  |
| H  | 14.725196137 | 14.452479969 | 5.346529091  |
| H  | 11.956238051 | 14.230218531 | 5.392309752  |
| H  | 9.048583683  | 15.585007934 | 5.115052179  |
| H  | 14.239976001 | 10.319864891 | 5.790807736  |
| H  | 16.663157900 | 12.828602698 | 6.399077284  |
| O  | 14.719828841 | 15.166639842 | 6.000264626  |
| O  | 11.919896608 | 15.083759691 | 5.857696492  |
| O  | 9.052420216  | 14.940911268 | 5.838506998  |
| O  | 14.952239543 | 10.971115151 | 5.918767506  |
| O  | 7.717249061  | 9.117205192  | 12.721761194 |
| H  | 7.890483990  | 8.369888090  | 13.332204513 |
| H  | 14.655453831 | 11.742787215 | 12.163898340 |
| O  | 13.326523160 | 9.025944192  | 12.795167668 |
| O  | 10.508224593 | 9.035213384  | 12.716767872 |
| O  | -0.625917786 | 9.030875686  | 12.794457562 |
| H  | -0.587085855 | 9.779258354  | 13.407639523 |
| O  | 2.415528450  | 13.235080597 | 12.650218530 |
| O  | 10.586921879 | 13.313526458 | 12.651298485 |
| H  | 7.487619655  | 14.962360858 | 11.322394887 |
| H  | 13.498197415 | 15.002505012 | 11.540907096 |
| H  | 3.345796897  | 14.593958132 | 11.774663137 |
| H  | 11.531245242 | 14.711413230 | 12.035933570 |
| O  | 1.873741795  | 5.002947779  | 12.791849360 |



|   |              |              |              |
|---|--------------|--------------|--------------|
| H | 7.545196078  | 6.942251251  | 11.487568529 |
| H | 4.139877800  | 6.553271928  | 11.089155468 |
| H | 15.967787331 | 6.952268663  | 11.499937934 |
| O | 7.701711184  | 0.966822735  | 12.639091833 |
| H | 7.780626056  | 0.313010119  | 13.346898356 |
| O | -0.697842885 | 0.887185479  | 12.713454944 |
| H | -0.619918457 | 0.109589921  | 13.286494632 |
| H | 6.340620816  | 3.454717705  | 12.080669707 |
| O | 4.901732619  | 0.817062662  | 12.641003834 |
| O | 2.097973575  | 0.882001791  | 12.563592007 |
| H | 14.817778176 | 3.594309905  | 12.131424145 |
| O | 13.258444456 | 0.892883766  | 12.787914109 |
| O | 10.439139566 | 0.962750133  | 12.642224066 |
| O | 2.171782206  | 9.114816147  | 12.641150979 |
| O | 4.911169959  | 8.947242146  | 12.704973255 |
| H | 2.172907807  | 8.324818713  | 13.203002924 |
| H | 4.858629567  | 9.672741208  | 13.344258423 |
| H | 13.178537326 | 8.221031142  | 13.330831563 |
| H | 10.496212744 | 9.629755157  | 13.482338215 |
| H | 13.245669481 | 1.631012854  | 13.414692787 |
| H | 10.378981046 | 1.706117159  | 13.261140664 |
| H | 2.093375279  | 1.623015683  | 13.189488250 |
| H | 4.807904939  | -0.009939462 | 13.137700203 |
| H | 9.450641377  | 14.747445306 | 11.982136473 |
| H | 10.678259736 | 13.054724089 | 13.578182275 |
| H | 1.715680585  | 13.910519482 | 12.695136790 |
| H | 0.063675029  | 14.625033948 | 10.933108831 |
| H | 1.070444821  | 6.576860539  | 12.008039962 |
| H | 2.695952104  | 5.438034154  | 13.066771475 |
| H | 6.297277263  | 11.684261093 | 12.038266459 |
| W | 10.404215433 | 6.697607991  | 12.899043179 |
| O | 10.362885945 | 4.918544362  | 12.865678203 |
| O | 9.202947687  | 7.265078103  | 11.371817020 |
| H | 11.835641302 | 7.035666490  | 13.825285192 |
| C | 9.370634394  | 7.175085670  | 14.469299859 |
| H | 9.335699895  | 8.175936748  | 14.928162706 |
| C | 8.661752145  | 6.147857432  | 15.340630533 |
| H | 7.601462435  | 6.448205666  | 15.434460950 |
| H | 8.652689613  | 5.159410063  | 14.859866022 |
| C | 9.279157043  | 6.035824755  | 16.741623617 |
| H | 9.283713471  | 7.009079989  | 17.252482495 |
| H | 8.713358725  | 5.329103925  | 17.366028472 |
| H | 10.318163941 | 5.685913359  | 16.676986707 |

**Species 2c. E: -2315.5821943830**

|    |             |             |              |
|----|-------------|-------------|--------------|
| Al | 0.725234114 | 4.903280610 | 8.589498789  |
| Al | 4.875387408 | 6.972851005 | 7.212583489  |
| O  | 3.415375409 | 7.191289384 | 11.207064821 |
| O  | 7.711412854 | 4.853717028 | 9.763069532  |
| O  | 3.405346925 | 6.845674958 | 8.454427683  |
| O  | 7.782636707 | 5.007241934 | 7.123820240  |
| Al | 4.786344680 | 3.070426506 | 10.032013914 |
| Al | 0.663133626 | 0.965913373 | 11.342307937 |
| O  | 7.629752173 | 0.808346148 | 7.279957879  |
| O  | 3.512011306 | 3.061416470 | 8.644679781  |
| O  | 7.572727937 | 1.126687722 | 10.080751068 |
| O  | 3.508599884 | 2.883851429 | 11.349045191 |
| Al | 7.776654489 | 3.023666940 | 9.936730596  |
| Al | 3.511096462 | 0.974579750 | 11.336470822 |
| O  | 4.993509926 | 0.729499563 | 7.213726508  |
| O  | 0.619462645 | 3.070619412 | 8.640219108  |

|    |              |             |              |
|----|--------------|-------------|--------------|
| O  | 4.996714195  | 1.133261605 | 10.084068707 |
| O  | 0.688371993  | 2.840007590 | 11.284782786 |
| Al | 3.492336759  | 4.894806516 | 8.474582962  |
| Al | 7.759972616  | 7.115409008 | 7.221020895  |
| O  | 0.765806895  | 7.189364236 | 11.288240153 |
| O  | 4.844367097  | 4.931341088 | 9.930880222  |
| O  | 0.776704220  | 6.851737105 | 8.474504130  |
| O  | 4.913947441  | 5.084219076 | 7.274498918  |
| Al | 6.241898919  | 0.945995946 | 8.613823188  |
| Al | 6.287147216  | 0.833360045 | 11.439304990 |
| Al | 6.320324490  | 5.913815110 | 9.924801237  |
| O  | 6.544191462  | 7.015688008 | 11.354678956 |
| O  | 6.370682320  | 7.091570146 | 8.552892983  |
| Al | 2.076104519  | 7.020603757 | 9.909696090  |
| Al | 2.098496232  | 6.875464553 | 7.077715627  |
| Al | 2.047570248  | 2.052675147 | 8.573297769  |
| O  | 2.187125057  | 0.954741189 | 7.126946956  |
| O  | 2.102692297  | 0.876247405 | 9.928658967  |
| Al | 2.073527340  | 3.950301216 | 11.383390597 |
| O  | 2.097474119  | 5.087469789 | 9.919651653  |
| O  | 2.043934467  | 5.011799135 | 7.286796454  |
| Al | 6.228506228  | 3.929458622 | 7.194438539  |
| O  | 6.262484133  | 2.858341177 | 8.656309801  |
| O  | 6.301234822  | 2.912901040 | 11.276940920 |
| H  | 1.919047997  | 1.379926492 | 6.297672688  |
| H  | 4.109959898  | 1.141486370 | 7.280183896  |
| H  | 7.337407212  | 1.402268436 | 6.543187671  |
| H  | 6.275893170  | 7.680648928 | 5.358269234  |
| H  | 3.578253099  | 6.201040496 | 5.335568110  |
| H  | 0.621408204  | 7.610203150 | 5.215623783  |
| H  | 5.881087573  | 2.438044959 | 5.413585095  |
| H  | 8.284649725  | 4.724676278 | 6.333950835  |
| O  | 6.322884192  | 6.946332621 | 5.989130059  |
| O  | 3.507294137  | 7.022307592 | 5.851060150  |
| O  | 0.627734255  | 6.947461673 | 5.919861551  |
| O  | 6.606469501  | 2.978371154 | 5.765832309  |
| Al | 9.172185581  | 4.912708539 | 8.578605746  |
| Al | 13.303891478 | 7.052071298 | 7.310664082  |
| O  | 11.685713201 | 7.262790802 | 11.432069622 |
| O  | 16.119274808 | 4.908679588 | 9.837552312  |
| O  | 11.826614642 | 6.931388880 | 8.557757988  |
| O  | 16.118775072 | 5.061958604 | 7.190916385  |
| Al | 13.201925461 | 3.106136041 | 10.118687277 |
| Al | 9.074155352  | 1.033669407 | 11.340765952 |
| O  | 15.977648881 | 0.890571026 | 7.432771212  |
| O  | 11.931064129 | 3.121027532 | 8.736018141  |
| O  | 15.949963008 | 1.130892916 | 10.170862182 |
| O  | 11.911151817 | 2.904235940 | 11.436604113 |
| Al | 16.187380827 | 3.058042515 | 10.027515106 |
| Al | 11.893744462 | 1.025184701 | 11.447798685 |
| O  | 13.249328043 | 0.792164973 | 7.508802693  |
| O  | 9.117691154  | 3.064106573 | 8.638658841  |
| O  | 13.394983091 | 1.186967478 | 10.238487036 |
| O  | 9.050408739  | 2.901498659 | 11.284713673 |
| Al | 11.933169058 | 4.958070704 | 8.571629057  |
| Al | 16.155393561 | 7.134589358 | 7.295893794  |
| O  | 13.246622676 | 4.931067945 | 9.999541309  |
| O  | 9.179370259  | 6.863701050 | 8.481217821  |
| O  | 13.321093160 | 5.165039687 | 7.355885461  |
| Al | 14.637115616 | 0.984736921 | 8.757846013  |
| Al | 14.691459900 | 0.889165327 | 11.575958811 |

|    |              |              |              |
|----|--------------|--------------|--------------|
| Al | 14.681948354 | 5.945602954  | 10.027957441 |
| O  | 14.959175772 | 7.025025095  | 11.443077715 |
| O  | 14.744524876 | 7.117983295  | 8.637286846  |
| Al | 10.506237652 | 7.093983617  | 9.958337698  |
| Al | 10.550294065 | 6.953042816  | 7.137844903  |
| Al | 10.567170851 | 2.020481900  | 8.562329409  |
| O  | 10.346807643 | 0.876195997  | 7.191944139  |
| O  | 10.515502511 | 0.885030472  | 10.009308599 |
| Al | 10.481078224 | 3.926788816  | 11.328267324 |
| O  | 10.500235669 | 5.155961595  | 9.991442162  |
| O  | 10.524073206 | 5.086206635  | 7.347960028  |
| Al | 14.582707213 | 3.972891712  | 7.342771672  |
| O  | 14.654583401 | 2.901111319  | 8.791090965  |
| O  | 14.725908528 | 2.985343095  | 11.379590740 |
| H  | 9.365872914  | 0.993802446  | 7.073640509  |
| H  | 13.373667362 | 1.364825869  | 6.727710716  |
| H  | 15.714137534 | 1.432195292  | 6.658233148  |
| H  | 14.646039245 | 7.783186587  | 5.467573696  |
| H  | 12.095803102 | 6.234663751  | 5.479422970  |
| H  | 9.078069478  | 6.662620406  | 5.104189512  |
| H  | 14.363397300 | 3.114341888  | 5.119131919  |
| H  | 16.603889557 | 4.895603647  | 6.355834459  |
| O  | 14.729103222 | 7.026352968  | 6.066587112  |
| O  | 11.983820919 | 7.086600631  | 5.935793721  |
| O  | 9.116585438  | 7.174661268  | 5.922939237  |
| O  | 14.646932016 | 2.831566754  | 5.999340648  |
| Al | 0.733643385  | 12.989745265 | 8.556977722  |
| Al | 4.870259716  | 14.988731881 | 7.071398318  |
| O  | 3.505478956  | 15.252032636 | 11.052694576 |
| O  | 7.695494466  | 12.981138944 | 9.755570897  |
| O  | 3.409091625  | 14.866432452 | 8.322282221  |
| O  | 7.724025346  | 12.994326507 | 7.051759534  |
| Al | 4.797270238  | 11.112152405 | 9.977030780  |
| Al | 0.724217964  | 9.150442977  | 11.447351392 |
| O  | 7.640846768  | 8.940638042  | 7.373914217  |
| O  | 3.504832077  | 11.045542121 | 8.564241854  |
| O  | 7.625683382  | 9.270038057  | 10.163139293 |
| O  | 3.520185425  | 10.931335571 | 11.271878770 |
| Al | 7.782189720  | 11.172441586 | 10.013665753 |
| Al | 3.549702328  | 9.066663501  | 11.374301433 |
| O  | 4.995967817  | 8.858598729  | 7.357211627  |
| O  | 0.617254734  | 11.175038306 | 8.713053791  |
| O  | 5.060368229  | 9.188402092  | 10.155950774 |
| O  | 0.711961640  | 11.045288673 | 11.373262030 |
| Al | 3.495058757  | 12.908216710 | 8.369666342  |
| Al | 7.701028942  | 15.088650927 | 7.137728012  |
| O  | 0.794600712  | 15.238594498 | 11.129198914 |
| O  | 4.826752367  | 12.916021126 | 9.767050763  |
| O  | 0.776878672  | 14.922047520 | 8.381953917  |
| O  | 4.900014560  | 13.075551762 | 7.122621219  |
| Al | 6.330368842  | 9.030770426  | 8.702768418  |
| Al | 6.330652959  | 8.957035299  | 11.528738105 |
| Al | 6.218373181  | 13.972560145 | 9.853924382  |
| O  | 6.481819910  | 15.027378915 | 11.284663440 |
| O  | 6.301909987  | 15.110010425 | 8.444015594  |
| Al | 2.162157249  | 15.086848418 | 9.809147479  |
| Al | 2.094738828  | 14.916688743 | 6.983414552  |
| Al | 1.992089261  | 10.091727563 | 8.602246060  |
| O  | 2.110217352  | 8.950963115  | 7.192928964  |
| O  | 2.044224206  | 8.951693303  | 10.006530331 |
| Al | 2.170247765  | 12.080582917 | 11.356290740 |

|    |              |              |              |
|----|--------------|--------------|--------------|
| O  | 2.106201472  | 13.154980619 | 9.836335307  |
| O  | 2.024806467  | 13.058100929 | 7.207030189  |
| Al | 6.204568884  | 11.910268429 | 7.186988116  |
| O  | 6.283685871  | 10.918550174 | 8.701608876  |
| O  | 6.305174949  | 11.064944806 | 11.290996638 |
| H  | 2.399242047  | 9.350812275  | 6.357519211  |
| H  | 4.180304849  | 9.330154492  | 7.609257849  |
| H  | 7.398122045  | 9.548250932  | 6.633999935  |
| H  | 6.348249769  | 14.257351543 | 5.256042460  |
| H  | 3.516019237  | 14.173854407 | 5.260968056  |
| H  | 0.570230165  | 15.654419623 | 5.077499449  |
| H  | 5.718886736  | 10.278947654 | 5.652742803  |
| H  | 8.283465772  | 12.770678795 | 6.279128341  |
| O  | 6.317753171  | 15.019534562 | 5.851724436  |
| O  | 3.493224524  | 15.011408110 | 5.753522734  |
| O  | 0.618892364  | 15.084002901 | 5.855316592  |
| O  | 6.464995412  | 10.892943756 | 5.768723309  |
| Al | 9.142441945  | 12.967245259 | 8.538045212  |
| Al | 13.257114270 | 15.073884973 | 7.220424384  |
| O  | 11.840452451 | 15.264053727 | 11.274854803 |
| O  | 16.134525357 | 13.068387325 | 9.904331338  |
| O  | 11.776937124 | 14.919254838 | 8.469075286  |
| O  | 16.129449483 | 13.078567415 | 7.184046345  |
| Al | 13.232511145 | 11.161231171 | 10.116919627 |
| Al | 9.081414823  | 9.186232653  | 11.394705593 |
| O  | 16.118348500 | 8.948882751  | 7.521379123  |
| O  | 11.964840641 | 11.079142752 | 8.706785228  |
| O  | 16.026063790 | 9.275389256  | 10.254591805 |
| O  | 11.927907458 | 10.973630476 | 11.423398706 |
| Al | 16.208109309 | 11.203669135 | 10.119164120 |
| Al | 11.978369768 | 9.102196308  | 11.446444621 |
| O  | 13.467750176 | 8.936170517  | 7.436138202  |
| O  | 9.050807464  | 11.139669813 | 8.646642519  |
| O  | 13.471324974 | 9.212602204  | 10.252389307 |
| O  | 9.105044059  | 11.047038170 | 11.352786971 |
| Al | 11.916851345 | 12.950191847 | 8.487066609  |
| Al | 16.137605200 | 15.223423093 | 7.236031159  |
| O  | 9.127712605  | 15.249833209 | 11.198956375 |
| O  | 13.236629109 | 12.979994458 | 9.918800120  |
| O  | 9.123457712  | 14.861339203 | 8.394913815  |
| O  | 13.323011502 | 13.156245602 | 7.275256140  |
| Al | 14.758718865 | 9.069295913  | 8.808755137  |
| Al | 14.753506405 | 8.932930599  | 11.629610161 |
| Al | 14.643499106 | 14.022820086 | 9.955836021  |
| O  | 14.494057250 | 15.084525662 | 11.420765555 |
| O  | 14.720156855 | 15.169254619 | 8.569060471  |
| Al | 10.521528599 | 15.096936861 | 9.870257779  |
| Al | 10.496388130 | 14.971742106 | 7.056506910  |
| Al | 10.469985270 | 10.120008343 | 8.647135047  |
| O  | 10.529785849 | 8.961764825  | 7.268845348  |
| O  | 10.510886561 | 9.027273895  | 10.076799601 |
| Al | 10.540614180 | 12.080652003 | 11.366583480 |
| O  | 10.507917593 | 13.167082187 | 9.912252493  |
| O  | 10.506636307 | 13.069453227 | 7.284199885  |
| Al | 14.621879839 | 11.983932720 | 7.313680885  |
| O  | 14.715318449 | 10.980815987 | 8.818279669  |
| O  | 14.720395742 | 11.124307866 | 11.419613748 |
| H  | 9.945686483  | 9.249533113  | 6.546416784  |
| H  | 12.654884671 | 9.457383089  | 7.567479750  |
| H  | 15.958743975 | 9.610365033  | 6.810367250  |
| H  | 14.725463914 | 14.452519540 | 5.346481299  |

|   |              |              |              |
|---|--------------|--------------|--------------|
| H | 11.956565907 | 14.230259603 | 5.392144805  |
| H | 9.048620669  | 15.584738917 | 5.114943189  |
| H | 14.240085045 | 10.319747347 | 5.791025558  |
| H | 16.663927343 | 12.828332940 | 6.399532158  |
| O | 14.719742597 | 15.166713913 | 6.000177548  |
| O | 11.919958839 | 15.083812628 | 5.857534508  |
| O | 9.052368667  | 14.940878189 | 5.838608315  |
| O | 14.952329568 | 10.971082139 | 5.918692688  |
| O | 7.717300281  | 9.116484717  | 12.722587188 |
| H | 7.884366398  | 8.366123076  | 13.330047743 |
| H | 14.654865366 | 11.742656076 | 12.163892884 |
| O | 13.326650459 | 9.026934498  | 12.794620604 |
| O | 10.508399823 | 9.035402836  | 12.716983822 |
| O | -0.625975371 | 9.030576628  | 12.794473887 |
| H | -0.587149786 | 9.778909267  | 13.407734786 |
| O | 2.415673949  | 13.234708592 | 12.650031467 |
| O | 10.587096147 | 13.313556162 | 12.651208364 |
| H | 7.488053201  | 14.962743846 | 11.322188667 |
| H | 13.498390101 | 15.002243060 | 11.541751462 |
| H | 3.346020061  | 14.593971980 | 11.774752756 |
| H | 11.531087563 | 14.711364134 | 12.035954310 |
| O | 1.873641991  | 5.002754038  | 12.791918706 |
| H | 7.545671182  | 6.941250856  | 11.489216048 |
| H | 4.139274480  | 6.552647414  | 11.088581473 |
| H | 15.967754922 | 6.952111216  | 11.500114841 |
| O | 7.701884853  | 0.967270723  | 12.638988349 |
| H | 7.781220543  | 0.314398390  | 13.347619504 |
| O | -0.697633999 | 0.887293022  | 12.713311496 |
| H | -0.619789297 | 0.110008959  | 13.286793910 |
| H | 6.339559376  | 3.454836290  | 12.080905852 |
| O | 4.901736976  | 0.817126866  | 12.641022616 |
| O | 2.098014536  | 0.882068478  | 12.563600824 |
| H | 14.816066577 | 3.594087912  | 12.130736100 |
| O | 13.258811706 | 0.892845052  | 12.787819623 |
| O | 10.439565535 | 0.962685371  | 12.642291565 |
| O | 2.171666495  | 9.114764910  | 12.641178569 |
| O | 4.911345819  | 8.946927510  | 12.704937802 |
| H | 2.171957755  | 8.324883243  | 13.203231660 |
| H | 4.857783975  | 9.673577027  | 13.342863213 |
| H | 13.177012321 | 8.222848698  | 13.331380821 |
| H | 10.501805689 | 9.631045743  | 13.481757115 |
| H | 13.245525795 | 1.632169924  | 13.413208551 |
| H | 10.381067427 | 1.706586004  | 13.260719996 |
| H | 2.093119592  | 1.623105788  | 13.189466140 |
| H | 4.807955381  | -0.009718181 | 13.137976754 |
| H | 9.450633463  | 14.747102624 | 11.981932527 |
| H | 10.676855802 | 13.055036356 | 13.578315813 |
| H | 1.715710427  | 13.910155118 | 12.693721296 |
| H | 0.063901399  | 14.624860657 | 10.933298869 |
| H | 1.071113659  | 6.577175417  | 12.008199787 |
| H | 2.696188149  | 5.434199511  | 13.071326269 |
| H | 6.297193074  | 11.683961229 | 12.038300503 |
| W | 10.422760406 | 6.696690842  | 12.900826755 |
| O | 10.428202656 | 4.917934813  | 12.867555974 |
| O | 9.206695454  | 7.263497808  | 11.377255250 |
| H | 11.847855347 | 7.060091298  | 13.823269837 |
| C | 9.391760036  | 7.162092426  | 14.479113328 |
| H | 9.328913809  | 8.172382929  | 14.910990427 |
| C | 8.734361529  | 6.131023682  | 15.380684203 |
| H | 7.667171848  | 6.370675551  | 15.526378326 |
| H | 8.791912301  | 5.111237172  | 14.981342972 |

H 9.198761785 6.131448412 16.381245159

**Species 2d. E: -2308.6974732529**

Al 0.725498007 4.903114521 8.589307575  
Al 4.875107159 6.972925529 7.212503188  
O 3.415573146 7.191076227 11.206936442  
O 7.711331610 4.853669905 9.762978582  
O 3.405470297 6.845705127 8.454191436  
O 7.782527217 5.007305680 7.123901227  
Al 4.786082072 3.070258028 10.032264368  
Al 0.663294054 0.966011456 11.342497497  
O 7.629558870 0.808239373 7.279889958  
O 3.511903255 3.061394299 8.644706080  
O 7.571755333 1.126065968 10.080323879  
O 3.508447526 2.883695019 11.349082625  
Al 7.775519361 3.022789345 9.936400657  
Al 3.511082854 0.974333185 11.336520543  
O 4.993331895 0.729301588 7.213465983  
O 0.619435014 3.070513457 8.640108228  
O 4.996334868 1.133132409 10.084103746  
O 0.688373555 2.840102733 11.284730199  
Al 3.492402902 4.894672359 8.474482953  
Al 7.759405952 7.115415036 7.220719971  
O 0.765732411 7.189206961 11.288491597  
O 4.844072839 4.931079898 9.930512725  
O 0.776765278 6.851708187 8.474324713  
O 4.913970558 5.084272888 7.274437159  
Al 6.241238968 0.945484357 8.613827979  
Al 6.286868005 0.833373240 11.439458003  
Al 6.319730172 5.913486990 9.924485383  
O 6.542281098 7.015675203 11.354092868  
O 6.370781313 7.091526376 8.552793171  
Al 2.076446295 7.020136585 9.909798723  
Al 2.098601091 6.875877279 7.077556485  
Al 2.047726430 2.052540003 8.573404202  
O 2.187053348 0.954673164 7.126949167  
O 2.102547578 0.876151220 9.928769813  
Al 2.073780547 3.950344803 11.383741652  
O 2.097426353 5.087435339 9.919681946  
O 2.044025005 5.011884496 7.286801818  
Al 6.227898186 3.929073153 7.194414009  
O 6.261139509 2.857661402 8.655901516  
O 6.300902281 2.912882180 11.276679182  
H 1.908419260 1.377449618 6.299942148  
H 4.110054640 1.142260726 7.277580709  
H 7.336911520 1.402033070 6.543138176  
H 6.275557545 7.680539192 5.357921862  
H 3.578335315 6.201256825 5.335085532  
H 0.620701318 7.606544414 5.212326514  
H 5.881536244 2.439060700 5.411906901  
H 8.283778388 4.724473338 6.333613376  
O 6.322920384 6.946371123 5.988930454  
O 3.507331834 7.022337511 5.850858870  
O 0.627662906 6.947378879 5.919849446  
O 6.606768700 2.978505858 5.765763662  
Al 9.171732937 4.911843579 8.578175765  
Al 13.304487103 7.051823170 7.310432965  
O 11.681646447 7.259292926 11.435513593  
O 16.119525557 4.908751461 9.837530499  
O 11.826839976 6.931627253 8.557812864  
O 16.118738047 5.061976262 7.190904624

|    |              |              |              |
|----|--------------|--------------|--------------|
| Al | 13.201013550 | 3.107335385  | 10.120191320 |
| Al | 9.073362024  | 1.033317815  | 11.340763840 |
| O  | 15.977610187 | 0.890601419  | 7.432843956  |
| O  | 11.931100194 | 3.121085276  | 8.736522538  |
| O  | 15.949643585 | 1.131067309  | 10.171074513 |
| O  | 11.908354820 | 2.907207851  | 11.437896327 |
| Al | 16.187591740 | 3.058341015  | 10.027772757 |
| Al | 11.892896999 | 1.026713430  | 11.448976599 |
| O  | 13.249819595 | 0.793524436  | 7.512200568  |
| O  | 9.117645996  | 3.064167302  | 8.638750579  |
| O  | 13.394535363 | 1.189390590  | 10.239562507 |
| O  | 9.047836361  | 2.899392399  | 11.283169515 |
| Al | 11.933173965 | 4.957201826  | 8.571545257  |
| Al | 16.155782951 | 7.134680910  | 7.295631526  |
| O  | 13.246732554 | 4.931662149  | 9.999600335  |
| O  | 9.179741740  | 6.863844392  | 8.481298879  |
| O  | 13.321055818 | 5.165049949  | 7.355930963  |
| Al | 14.637930181 | 0.987113592  | 8.758605586  |
| Al | 14.691203270 | 0.889686593  | 11.576597457 |
| Al | 14.682699231 | 5.945483414  | 10.027750498 |
| O  | 14.959077215 | 7.024943657  | 11.443104060 |
| O  | 14.744529442 | 7.117974547  | 8.637201682  |
| Al | 10.506219419 | 7.093933134  | 9.953387924  |
| Al | 10.550419193 | 6.952675634  | 7.136609400  |
| Al | 10.567150419 | 2.020375321  | 8.563582926  |
| O  | 10.345291578 | 0.876864483  | 7.193269330  |
| O  | 10.515589136 | 0.884949461  | 10.010213384 |
| Al | 10.473797163 | 3.927647012  | 11.330386838 |
| O  | 10.500136891 | 5.156430345  | 9.991636734  |
| O  | 10.524114806 | 5.086302075  | 7.348031738  |
| Al | 14.582892475 | 3.972768976  | 7.342657252  |
| O  | 14.654760008 | 2.901840837  | 8.791510609  |
| O  | 14.725920640 | 2.985712524  | 11.380587143 |
| H  | 9.364244247  | 0.995391761  | 7.076011578  |
| H  | 13.372427811 | 1.362591247  | 6.728443852  |
| H  | 15.713217275 | 1.431531492  | 6.658056916  |
| H  | 14.646175579 | 7.783264360  | 5.467374370  |
| H  | 12.096360937 | 6.235243618  | 5.478366870  |
| H  | 9.077461320  | 6.662763897  | 5.104081692  |
| H  | 14.365196224 | 3.114611560  | 5.118644000  |
| H  | 16.604143425 | 4.895832480  | 6.355922311  |
| O  | 14.729262930 | 7.026302329  | 6.066264148  |
| O  | 11.984009353 | 7.086631143  | 5.935648881  |
| O  | 9.116539943  | 7.174550450  | 5.922989382  |
| O  | 14.647046756 | 2.831594299  | 5.999301290  |
| Al | 0.733937399  | 12.986860244 | 8.556523645  |
| Al | 4.870124899  | 14.988619650 | 7.070859173  |
| O  | 3.505345020  | 15.251837947 | 11.052354733 |
| O  | 7.695029480  | 12.981010218 | 9.755489679  |
| O  | 3.409074158  | 14.865859292 | 8.322207293  |
| O  | 7.724032564  | 12.994281060 | 7.051678428  |
| Al | 4.797062257  | 11.111384729 | 9.977436297  |
| Al | 0.724689082  | 9.149890518  | 11.447521335 |
| O  | 7.640874287  | 8.940539298  | 7.374178899  |
| O  | 3.505053668  | 11.045346171 | 8.564182938  |
| O  | 7.625928378  | 9.270075638  | 10.163619515 |
| O  | 3.519484384  | 10.927947733 | 11.271648353 |
| Al | 7.781240688  | 11.172611736 | 10.013347294 |
| Al | 3.550000038  | 9.065070629  | 11.375232082 |
| O  | 4.996213238  | 8.858397489  | 7.357089930  |
| O  | 0.616822305  | 11.169024353 | 8.712956860  |

|    |              |              |              |
|----|--------------|--------------|--------------|
| O  | 5.060759986  | 9.188050549  | 10.156049673 |
| O  | 0.711916489  | 11.044975339 | 11.373430929 |
| Al | 3.495264460  | 12.908089593 | 8.369781223  |
| Al | 7.700642715  | 15.088344008 | 7.136813545  |
| O  | 0.794474085  | 15.238569124 | 11.129127310 |
| O  | 4.826589398  | 12.915633327 | 9.767071319  |
| O  | 0.776746740  | 14.921633055 | 8.381783331  |
| O  | 4.900047556  | 13.075444455 | 7.122739888  |
| Al | 6.330019186  | 9.030479064  | 8.703189817  |
| Al | 6.330422069  | 8.957045426  | 11.530224272 |
| Al | 6.217972121  | 13.972673312 | 9.853446869  |
| O  | 6.481184280  | 15.026927406 | 11.284462932 |
| O  | 6.301577938  | 15.109385190 | 8.442596724  |
| Al | 2.161654791  | 15.086551948 | 9.808911233  |
| Al | 2.094848227  | 14.916347738 | 6.983564294  |
| Al | 1.993914389  | 10.090037045 | 8.602610184  |
| O  | 2.110332425  | 8.950570222  | 7.192512236  |
| O  | 2.044846185  | 8.950778512  | 10.006709953 |
| Al | 2.170788212  | 12.079405073 | 11.356603573 |
| O  | 2.105996619  | 13.154267007 | 9.836325473  |
| O  | 2.024825060  | 13.057422453 | 7.207076220  |
| Al | 6.204671548  | 11.910244118 | 7.186870895  |
| O  | 6.283853602  | 10.918289263 | 8.701634023  |
| O  | 6.304985067  | 11.065089334 | 11.290833156 |
| H  | 2.396930410  | 9.350025944  | 6.355996945  |
| H  | 4.180215574  | 9.330079298  | 7.607755910  |
| H  | 7.398065154  | 9.548369967  | 6.634430476  |
| H  | 6.348545428  | 14.257762685 | 5.254720503  |
| H  | 3.516200479  | 14.173762929 | 5.260734727  |
| H  | 0.569091010  | 15.645960089 | 5.072134382  |
| H  | 5.719134439  | 10.278483843 | 5.653201666  |
| H  | 8.284357408  | 12.770329040 | 6.279750726  |
| O  | 6.317666252  | 15.019299017 | 5.851196965  |
| O  | 3.493061037  | 15.011234504 | 5.753435964  |
| O  | 0.619017449  | 15.084011570 | 5.855937457  |
| O  | 6.464943793  | 10.892957753 | 5.768642352  |
| Al | 9.142069545  | 12.966716993 | 8.539089650  |
| Al | 13.260148587 | 15.074194802 | 7.232829478  |
| O  | 11.840753112 | 15.264359495 | 11.276590692 |
| O  | 16.134988356 | 13.067485171 | 9.903876918  |
| O  | 11.775712426 | 14.919111982 | 8.476175252  |
| O  | 16.129439163 | 13.077933728 | 7.184602160  |
| Al | 13.232806201 | 11.161168833 | 10.117256202 |
| Al | 9.079521298  | 9.189895285  | 11.395678131 |
| O  | 16.118085804 | 8.948542971  | 7.521383695  |
| O  | 11.965925146 | 11.077827533 | 8.707140450  |
| O  | 16.025592272 | 9.274959984  | 10.254890841 |
| O  | 11.928084668 | 10.973869228 | 11.423580016 |
| Al | 16.208269805 | 11.202441601 | 10.119386976 |
| Al | 11.978339748 | 9.104026691  | 11.448283557 |
| O  | 13.467755267 | 8.935876663  | 7.436177797  |
| O  | 9.050656186  | 11.139162730 | 8.646956607  |
| O  | 13.470610687 | 9.211691961  | 10.253315775 |
| O  | 9.105008942  | 11.047662447 | 11.352810825 |
| Al | 11.916160419 | 12.949684633 | 8.488071664  |
| Al | 16.137980794 | 15.223568180 | 7.235648415  |
| O  | 9.127750394  | 15.249547284 | 11.199417480 |
| O  | 13.236804721 | 12.979749110 | 9.919333530  |
| O  | 9.121939384  | 14.860971476 | 8.396497058  |
| O  | 13.323395831 | 13.155636529 | 7.276856450  |
| Al | 14.759012580 | 9.069045021  | 8.808277734  |



|    |              |              |              |
|----|--------------|--------------|--------------|
| Al | 14.754208510 | 8.933044361  | 11.629406045 |
| Al | 14.644138087 | 14.021866485 | 9.957261021  |
| O  | 14.493961322 | 15.084674664 | 11.420984106 |
| O  | 14.720310272 | 15.169332333 | 8.570639948  |
| Al | 10.523119566 | 15.095877287 | 9.874665902  |
| Al | 10.492805323 | 14.973184829 | 7.067214726  |
| Al | 10.470307992 | 10.120117470 | 8.647408672  |
| O  | 10.529752440 | 8.961682116  | 7.269047972  |
| O  | 10.511197068 | 9.026174010  | 10.077578407 |
| Al | 10.540735388 | 12.080935391 | 11.368062263 |
| O  | 10.507721448 | 13.165854125 | 9.913400305  |
| O  | 10.505721413 | 13.069148772 | 7.286010880  |
| Al | 14.621474637 | 11.983162484 | 7.314211842  |
| O  | 14.715196960 | 10.980363275 | 8.819003742  |
| O  | 14.720356961 | 11.124034513 | 11.419938939 |
| H  | 9.945021538  | 9.249760236  | 6.547217402  |
| H  | 12.654848825 | 9.457110625  | 7.567141778  |
| H  | 15.960557921 | 9.610880715  | 6.810798555  |
| H  | 14.722267778 | 14.447631477 | 5.352982323  |
| H  | 11.958774624 | 14.239756053 | 5.411298668  |
| H  | 9.051571532  | 15.589342077 | 5.119656633  |
| H  | 14.241036871 | 10.318775092 | 5.790713709  |
| H  | 16.663080179 | 12.828428925 | 6.399303555  |
| O  | 14.719183539 | 15.166713398 | 6.001379475  |
| O  | 11.921317687 | 15.083378467 | 5.893794351  |
| O  | 9.054044969  | 14.941348533 | 5.839658122  |
| O  | 14.952307646 | 10.971024213 | 5.918843037  |
| O  | 7.717427109  | 9.116690973  | 12.722539395 |
| H  | 7.882412938  | 8.374592318  | 13.342073770 |
| H  | 14.655128748 | 11.741836356 | 12.164703790 |
| O  | 13.326771017 | 9.026285654  | 12.794743987 |
| O  | 10.508872547 | 9.035063444  | 12.715601085 |
| O  | -0.625959287 | 9.030464352  | 12.794482196 |
| H  | -0.586574490 | 9.777920221  | 13.408768731 |
| O  | 2.415860990  | 13.234331349 | 12.649747244 |
| O  | 10.586997094 | 13.313641487 | 12.652242599 |
| H  | 7.487206431  | 14.962193575 | 11.322607692 |
| H  | 13.498156152 | 15.002546087 | 11.541770753 |
| H  | 3.346391651  | 14.593727466 | 11.774437929 |
| H  | 11.532040883 | 14.713301573 | 12.039063400 |
| O  | 1.873397904  | 5.002654395  | 12.791997072 |
| H  | 7.540772515  | 6.938118401  | 11.494856103 |
| H  | 4.138961530  | 6.551244077  | 11.092501816 |
| H  | 15.967730717 | 6.951772474  | 11.500839431 |
| O  | 7.701543655  | 0.967004578  | 12.638655764 |
| H  | 7.780213714  | 0.317459168  | 13.350338412 |
| O  | -0.697660387 | 0.887333312  | 12.713326095 |
| H  | -0.619539732 | 0.110718545  | 13.287660691 |
| H  | 6.341740951  | 3.454354650  | 12.080894544 |
| O  | 4.901585416  | 0.817100453  | 12.640978665 |
| O  | 2.097981046  | 0.882014437  | 12.563628555 |
| H  | 14.818164539 | 3.593657230  | 12.132155559 |
| O  | 13.258468062 | 0.893002193  | 12.788013792 |
| O  | 10.439205806 | 0.962881255  | 12.642482217 |
| O  | 2.171420562  | 9.114438802  | 12.641478827 |
| O  | 4.911179960  | 8.946635458  | 12.704732572 |
| H  | 2.171272837  | 8.325638974  | 13.205082606 |
| H  | 4.857394394  | 9.669126458  | 13.347192325 |
| H  | 13.181048738 | 8.223079374  | 13.333375326 |
| H  | 10.492948037 | 9.616054895  | 13.491190714 |
| H  | 13.245761060 | 1.629099615  | 13.417155357 |

|   |              |              |              |
|---|--------------|--------------|--------------|
| H | 10.378367937 | 1.705191159  | 13.262677310 |
| H | 2.093448283  | 1.622655456  | 13.189971991 |
| H | 4.807918039  | -0.009077870 | 13.139042178 |
| H | 9.449480925  | 14.747467479 | 11.983289248 |
| H | 10.672608684 | 13.054886729 | 13.579698042 |
| H | 1.715842816  | 13.909773164 | 12.692732247 |
| H | 0.063904238  | 14.624696596 | 10.933478515 |
| H | 1.072342975  | 6.577740642  | 12.008598902 |
| H | 2.696286060  | 5.428529095  | 13.078580096 |
| H | 6.297132533  | 11.683554707 | 12.038593977 |
| W | 10.408281442 | 6.701902596  | 12.894462584 |
| O | 10.365090064 | 4.920972423  | 12.865676793 |
| O | 9.204861286  | 7.264304223  | 11.375951236 |
| H | 11.848733712 | 7.036348177  | 13.804591534 |
| C | 9.409799674  | 7.183110375  | 14.469570722 |
| H | 9.265049369  | 8.087884192  | 15.068090756 |
| H | 9.025794212  | 6.285160788  | 14.982484391 |

**Ethylene. E: -13.725461527**

|   |             |             |             |
|---|-------------|-------------|-------------|
| C | 8.119919958 | 7.976080242 | 7.330289458 |
| C | 7.881740831 | 8.033158755 | 8.642070039 |
| H | 7.961941353 | 8.969111722 | 9.197390154 |
| H | 7.594792441 | 7.148942418 | 9.213685910 |
| H | 8.406514777 | 8.862425204 | 6.761682873 |
| H | 8.040708718 | 7.042362270 | 6.771094321 |

**Propylene. E: -20.615162586**

|   |             |             |             |
|---|-------------|-------------|-------------|
| C | 7.872470114 | 8.518174448 | 7.957301831 |
| C | 7.634610389 | 8.584833720 | 9.271305362 |
| H | 7.717458884 | 9.523128317 | 9.820429489 |
| H | 7.347971615 | 7.699360273 | 9.843817677 |
| C | 7.783379026 | 7.275601541 | 7.125165329 |
| H | 8.747863577 | 7.053046054 | 6.641570881 |
| H | 7.492460505 | 6.404526203 | 7.727870052 |
| H | 7.048577011 | 7.393839772 | 6.313130897 |
| H | 8.156787259 | 9.433773833 | 7.427186824 |

**1-butene. E: -27.4985808853**

|   |             |             |             |
|---|-------------|-------------|-------------|
| C | 7.399015989 | 8.823762523 | 8.010904346 |
| C | 7.069445344 | 8.947993532 | 9.301236484 |
| H | 7.130108426 | 9.906507164 | 9.818356381 |
| H | 6.724953302 | 8.091412638 | 9.886886163 |
| C | 7.355754917 | 7.547727638 | 7.220679697 |
| H | 6.924744713 | 6.744864336 | 7.838870783 |
| H | 6.676422834 | 7.682986763 | 6.360967405 |
| H | 7.746584060 | 9.710558136 | 7.466438132 |
| C | 8.737055119 | 7.124988107 | 6.695863865 |
| H | 9.426126452 | 6.918998808 | 7.527205599 |
| H | 8.664958830 | 6.217879650 | 6.078707647 |
| H | 9.187378648 | 7.915481601 | 6.078120329 |

**Trans-2butene. E: -27.503743849**

|   |             |             |             |
|---|-------------|-------------|-------------|
| C | 8.150064364 | 7.949377570 | 7.358662271 |
| C | 7.848009144 | 8.053760203 | 8.659015687 |
| H | 7.495074803 | 7.158698882 | 9.185086215 |
| C | 8.048493493 | 6.694209311 | 6.545909106 |
| H | 9.025295671 | 6.411808978 | 6.121762591 |
| H | 7.684096419 | 5.851390163 | 7.149380588 |
| H | 7.364097148 | 6.823105592 | 5.692364871 |
| H | 8.502916128 | 8.844027779 | 6.831627774 |
| C | 7.951571373 | 9.307074939 | 9.474300616 |

|   |             |              |              |
|---|-------------|--------------|--------------|
| H | 6.978545854 | 9.582106942  | 9.911405931  |
| H | 8.646929278 | 9.178649161  | 10.319090474 |
| H | 8.304360751 | 10.154188436 | 8.870021932  |

**Isobutene. E: -27.504923553**

|   |             |              |             |
|---|-------------|--------------|-------------|
| C | 7.700306536 | 7.999161719  | 7.922018702 |
| C | 7.431305709 | 7.999336086  | 9.235357852 |
| H | 7.319164906 | 8.930136828  | 9.793859043 |
| H | 7.316518273 | 7.068669614  | 9.793564483 |
| C | 7.862565070 | 9.272378169  | 7.135631989 |
| H | 8.855670172 | 9.315273719  | 6.660317452 |
| H | 7.125377937 | 9.324491555  | 6.318075708 |
| H | 7.743024668 | 10.162846152 | 7.765478021 |
| C | 7.861011301 | 6.725726432  | 7.135683983 |
| H | 8.860072145 | 6.674852943  | 6.673604239 |
| H | 7.725659237 | 5.835379743  | 7.762600768 |
| H | 7.134418477 | 6.681144240  | 6.308234005 |

**Isoamylene. E: -34.3839604574**

|   |             |              |              |
|---|-------------|--------------|--------------|
| C | 7.985245518 | 8.848459167  | 8.510796228  |
| C | 7.563519232 | 9.094641022  | 9.754964797  |
| H | 7.748355479 | 10.050833421 | 10.245323566 |
| H | 7.015653741 | 8.342597912  | 10.327640062 |
| C | 7.776881296 | 7.564915081  | 7.753961129  |
| H | 7.236488290 | 6.864528502  | 8.413562268  |
| H | 8.532757158 | 9.629306984  | 7.968272467  |
| C | 9.127747698 | 6.933400215  | 7.376506263  |
| H | 9.732182864 | 6.721955568  | 8.268980490  |
| H | 8.980020175 | 5.991759583  | 6.828051306  |
| H | 9.706842358 | 7.609479106  | 6.729328801  |
| C | 6.920395428 | 7.808746677  | 6.499459298  |
| H | 7.417069085 | 8.517633427  | 5.819317998  |
| H | 6.761317167 | 6.871435293  | 5.946575065  |
| H | 5.938712708 | 8.225184930  | 6.762510481  |

**4me-2pentene. E: -41.272710182**

|   |             |              |              |
|---|-------------|--------------|--------------|
| C | 8.150729475 | 8.267008470  | 8.001871183  |
| C | 7.786559081 | 8.523729483  | 9.264193270  |
| H | 7.289105148 | 7.729323977  | 9.833923429  |
| C | 7.938738020 | 6.966460394  | 7.274686191  |
| H | 7.432871373 | 6.268661108  | 7.964139450  |
| H | 8.649548191 | 9.056888887  | 7.423513588  |
| C | 9.285077172 | 6.346563291  | 6.861713084  |
| H | 9.923085920 | 6.161279086  | 7.736544518  |
| H | 9.134545408 | 5.392833311  | 6.334702043  |
| H | 9.831396417 | 7.020133345  | 6.183413616  |
| C | 7.036586391 | 7.169954687  | 6.045004546  |
| H | 7.496779283 | 7.877448805  | 5.338024918  |
| H | 6.877809870 | 6.221156698  | 5.511533814  |
| H | 6.056101586 | 7.572960239  | 6.332951697  |
| C | 7.999968139 | 9.822421151  | 9.981780633  |
| H | 7.043993707 | 10.256690957 | 10.315046175 |
| H | 8.611136990 | 9.683347510  | 10.887579718 |
| H | 8.503477907 | 10.559523547 | 9.341329257  |

**5me-3esene. E: -48.156345160**

|   |             |             |             |
|---|-------------|-------------|-------------|
| C | 8.269623169 | 7.919169212 | 7.618627344 |
| C | 7.958233350 | 8.144186265 | 8.901014263 |
| H | 7.507006488 | 7.328516439 | 9.481234297 |
| C | 8.066964039 | 6.623414059 | 6.880313333 |
| H | 7.609602457 | 5.901469515 | 7.578778949 |

|   |              |              |              |
|---|--------------|--------------|--------------|
| H | 8.715542039  | 8.734011664  | 7.031656500  |
| C | 9.413011227  | 6.049262760  | 6.405217947  |
| H | 10.090506242 | 5.871353690  | 7.251438834  |
| H | 9.268626679  | 5.098337517  | 5.871423291  |
| H | 9.912088257  | 6.747192341  | 5.715295063  |
| C | 7.110531700  | 6.817864398  | 5.690995867  |
| H | 7.520084213  | 7.550456158  | 4.978407591  |
| H | 6.959256591  | 5.873147441  | 5.148273182  |
| H | 6.130575820  | 7.185578164  | 6.024650822  |
| C | 8.148512441  | 9.441854778  | 9.631200200  |
| H | 8.826793744  | 9.282172468  | 10.487583353 |
| H | 8.646921456  | 10.167847596 | 8.969732613  |
| C | 6.826269277  | 10.026638307 | 10.152365349 |
| H | 6.142124125  | 10.248764693 | 9.321436892  |
| H | 6.316637328  | 9.317894632  | 10.821565971 |
| H | 6.995428045  | 10.955613141 | 10.714983344 |

**2,4me-2pentene. E: -48.1600820136**

|   |              |              |              |
|---|--------------|--------------|--------------|
| C | 8.073303530  | 8.195532645  | 7.766283239  |
| C | 7.545931201  | 8.474948649  | 8.971837989  |
| C | 8.085041985  | 6.888945463  | 7.019274948  |
| H | 7.559810375  | 6.122267564  | 7.610041825  |
| H | 8.568796188  | 9.018087849  | 7.233611301  |
| C | 9.530339044  | 6.407746115  | 6.798977577  |
| H | 10.049400758 | 6.257469539  | 7.755509206  |
| H | 9.550312581  | 5.459652637  | 6.241195379  |
| H | 10.102442573 | 7.149005616  | 6.219765433  |
| C | 7.351624967  | 7.033942531  | 5.674168973  |
| H | 7.836340777  | 7.798926934  | 5.048142277  |
| H | 7.362468918  | 6.087239714  | 5.113930404  |
| H | 6.305770886  | 7.336116974  | 5.822287457  |
| C | 7.637386937  | 9.862260933  | 9.554809208  |
| H | 6.634264943  | 10.273989276 | 9.753855410  |
| H | 8.165181630  | 9.850338486  | 10.522581398 |
| H | 8.164745835  | 10.554136060 | 8.885262840  |
| C | 6.833367035  | 7.479191077  | 9.848910551  |
| H | 5.807109280  | 7.817996087  | 10.064655100 |
| H | 6.773537021  | 6.476914142  | 9.409411217  |
| H | 7.340625774  | 7.391610835  | 10.823473508 |

**2pentene. E: -34.387302291**

|   |             |              |              |
|---|-------------|--------------|--------------|
| C | 7.753903188 | 8.249081226  | 7.418429543  |
| C | 7.229014074 | 8.518356061  | 8.620629406  |
| C | 7.751514702 | 6.906086965  | 6.748001278  |
| H | 7.180773223 | 6.189562155  | 7.359622627  |
| H | 8.246643728 | 9.061067729  | 6.867778276  |
| C | 9.167883039 | 6.366724479  | 6.493083971  |
| H | 9.706507556 | 6.218473840  | 7.439531749  |
| H | 9.138171845 | 5.405269935  | 5.961159560  |
| H | 9.755398672 | 7.068793642  | 5.883446590  |
| C | 7.242896451 | 9.858913517  | 9.290757804  |
| H | 6.220395268 | 10.215986263 | 9.492632940  |
| H | 7.755079259 | 9.814529794  | 10.265148626 |
| H | 7.750370843 | 10.613143608 | 8.673372322  |
| H | 6.743647276 | 7.703272828  | 9.171280935  |
| H | 7.222610786 | 6.982523351  | 5.781706758  |

**2me-2butene. E: -34.391109077**

|   |             |             |             |
|---|-------------|-------------|-------------|
| C | 8.027556011 | 7.944479897 | 7.333665245 |
| C | 7.820488929 | 7.898834433 | 8.662421482 |

|   |             |              |              |
|---|-------------|--------------|--------------|
| H | 7.681216653 | 8.857411840  | 9.174816018  |
| C | 8.237488136 | 6.738472125  | 6.456850839  |
| H | 9.203207736 | 6.806683007  | 5.930197345  |
| H | 8.220357743 | 5.790991786  | 7.006989116  |
| H | 7.462513597 | 6.689673265  | 5.674359557  |
| C | 8.063861401 | 9.261230857  | 6.600650504  |
| H | 9.030648697 | 9.403255296  | 6.090217075  |
| H | 7.290901965 | 9.298562736  | 5.815440334  |
| H | 7.905971115 | 10.111621726 | 7.276841512  |
| C | 7.751940194 | 6.692457309  | 9.550284554  |
| H | 6.772829182 | 6.627848025  | 10.051752998 |
| H | 7.911304020 | 5.750298229  | 9.011583639  |
| H | 8.506470792 | 6.750181323  | 10.351000527 |

**3esene. E: -41.2709007388**

|   |              |              |              |
|---|--------------|--------------|--------------|
| C | 7.933999202  | 7.846738250  | 7.290008452  |
| C | 7.997565635  | 8.053993554  | 8.611574995  |
| C | 8.012994906  | 6.509515812  | 6.612746073  |
| H | 8.055653383  | 5.713387131  | 7.372659305  |
| H | 7.837214181  | 8.716602642  | 6.627341589  |
| C | 9.218691345  | 6.396845433  | 5.666355151  |
| H | 10.161333918 | 6.512651405  | 6.219158437  |
| H | 9.236873422  | 5.422704113  | 5.157505388  |
| H | 9.189432893  | 7.178406429  | 4.892974503  |
| C | 7.922407950  | 9.391330368  | 9.288964244  |
| H | 8.847691059  | 9.559057511  | 9.867501171  |
| H | 7.881154314  | 10.187537207 | 8.529093096  |
| H | 8.092323521  | 7.183589864  | 9.274403098  |
| C | 6.719579008  | 9.508231031  | 10.238355417 |
| H | 5.774683409  | 9.398730101  | 9.687906440  |
| H | 6.746818456  | 8.724528157  | 11.009661669 |
| H | 6.708024137  | 10.481134562 | 10.749756077 |
| H | 7.089549497  | 6.338896766  | 6.032251289  |

**2me-2pentene. E: -41.2746891556**

|   |             |              |              |
|---|-------------|--------------|--------------|
| C | 8.525210454 | 7.839399818  | 7.909278997  |
| C | 8.228163720 | 7.966230977  | 9.215691611  |
| C | 8.405812355 | 6.622725507  | 7.037622942  |
| H | 8.157871452 | 5.731924545  | 7.632099660  |
| H | 8.881140531 | 8.738195370  | 7.390765477  |
| H | 9.386917818 | 6.416843448  | 6.575507797  |
| C | 7.713557447 | 6.852787958  | 10.089499220 |
| H | 6.746303268 | 7.131314103  | 10.538413630 |
| H | 7.576323367 | 5.906947624  | 9.553114924  |
| H | 8.402535128 | 6.669277521  | 10.930053611 |
| C | 8.397604260 | 9.285483881  | 9.924769824  |
| H | 7.441367399 | 9.630390725  | 10.351456107 |
| H | 9.098607724 | 9.192721196  | 10.770556120 |
| H | 8.774481703 | 10.066986206 | 9.252236610  |
| C | 7.363569096 | 6.802689294  | 5.921230666  |
| H | 7.596290538 | 7.680649618  | 5.301038800  |
| H | 7.329504679 | 5.924449753  | 5.260832499  |
| H | 6.360502187 | 6.953727314  | 6.344152801  |

**METALLACYCLOBUTANE**

**1-butene (1,2) insertion (side path) into species 1. E: -2356.8792225847**

|    |             |             |              |
|----|-------------|-------------|--------------|
| Al | 0.723374900 | 4.903794537 | 8.589812169  |
| Al | 4.869801373 | 6.974143448 | 7.185940987  |
| O  | 3.415714680 | 7.190956364 | 11.204474903 |

|    |              |             |              |
|----|--------------|-------------|--------------|
| O  | 7.705114868  | 4.850506205 | 9.755115575  |
| O  | 3.395677456  | 6.844989917 | 8.433329456  |
| O  | 7.769016903  | 5.004776894 | 7.113601890  |
| Al | 4.782969183  | 3.069915622 | 10.030483402 |
| Al | 0.664465473  | 0.967763669 | 11.340258740 |
| O  | 7.629586673  | 0.807693944 | 7.279951301  |
| O  | 3.510388190  | 3.061394192 | 8.643397901  |
| O  | 7.569559386  | 1.125267894 | 10.079712112 |
| O  | 3.507845762  | 2.883055688 | 11.348883860 |
| Al | 7.769613479  | 3.022109869 | 9.932993685  |
| Al | 3.511052542  | 0.972952578 | 11.335333322 |
| O  | 4.992660430  | 0.728304911 | 7.213007662  |
| O  | 0.618682106  | 3.070841715 | 8.640498726  |
| O  | 4.994989253  | 1.132382441 | 10.084594899 |
| O  | 0.688538780  | 2.841121184 | 11.285042220 |
| Al | 3.489831128  | 4.895507545 | 8.468822230  |
| Al | 7.734608579  | 7.118900626 | 7.190517781  |
| O  | 0.765853039  | 7.189590152 | 11.287112872 |
| O  | 4.839581774  | 4.929694984 | 9.925741516  |
| O  | 0.773611974  | 6.851249123 | 8.472969490  |
| O  | 4.911571472  | 5.082638805 | 7.268697355  |
| Al | 6.239374408  | 0.941437609 | 8.614513671  |
| Al | 6.286011998  | 0.833821744 | 11.439641415 |
| Al | 6.312777192  | 5.913127066 | 9.889285161  |
| O  | 6.552124593  | 7.026343523 | 11.293822136 |
| O  | 6.325638488  | 7.085919408 | 8.502866470  |
| Al | 2.076632070  | 7.019812192 | 9.905438943  |
| Al | 2.093194116  | 6.872476595 | 7.072067609  |
| Al | 2.046553975  | 2.052481635 | 8.571323662  |
| O  | 2.187252067  | 0.956063272 | 7.124961852  |
| O  | 2.101880032  | 0.875499367 | 9.927128671  |
| Al | 2.074263878  | 3.951393242 | 11.382667164 |
| O  | 2.096945877  | 5.088090536 | 9.918523646  |
| O  | 2.038314635  | 5.008916630 | 7.284201812  |
| Al | 6.216224077  | 3.920546604 | 7.190942747  |
| O  | 6.253308147  | 2.849724757 | 8.652113011  |
| O  | 6.299687921  | 2.912870610 | 11.275435043 |
| H  | 1.910271411  | 1.380561832 | 6.298230207  |
| H  | 4.108616733  | 1.139937775 | 7.277537102  |
| H  | 7.335692621  | 1.400649000 | 6.543207616  |
| H  | 6.269101621  | 7.685252530 | 5.307732718  |
| H  | 3.573423186  | 6.205852487 | 5.318402419  |
| H  | 0.612072763  | 7.598534211 | 5.204937635  |
| H  | 5.884930927  | 2.433791980 | 5.403541237  |
| H  | 8.258362365  | 4.724693755 | 6.314301791  |
| O  | 6.316882998  | 6.944903076 | 5.931396166  |
| O  | 3.503528464  | 7.021042259 | 5.843361342  |
| O  | 0.624614553  | 6.947144376 | 5.919348871  |
| O  | 6.605174262  | 2.975885624 | 5.763377760  |
| Al | 9.149704885  | 4.907694715 | 8.540331012  |
| Al | 13.278172390 | 7.029178122 | 7.294266587  |
| O  | 11.676832620 | 7.254482262 | 11.369995254 |
| O  | 16.116961591 | 4.909022155 | 9.837623349  |
| O  | 11.774670593 | 6.923572238 | 8.550496832  |
| O  | 16.116491971 | 5.060672384 | 7.190630071  |
| Al | 13.203601022 | 3.108349463 | 10.113959368 |
| Al | 9.072226092  | 1.031386274 | 11.340555278 |
| O  | 15.977755592 | 0.892159592 | 7.429535484  |
| O  | 11.922781360 | 3.126324834 | 8.733930021  |
| O  | 15.952182447 | 1.132012583 | 10.168547500 |
| O  | 11.910001989 | 2.903579896 | 11.430258053 |

|    |              |              |              |
|----|--------------|--------------|--------------|
| Al | 16.187614624 | 3.058961009  | 10.027917681 |
| Al | 11.894977729 | 1.025478512  | 11.447429147 |
| O  | 13.248147317 | 0.794336456  | 7.507667042  |
| O  | 9.115928996  | 3.060450493  | 8.635819005  |
| O  | 13.394771780 | 1.191088042  | 10.235553722 |
| O  | 9.043397713  | 2.896469908  | 11.279710099 |
| Al | 11.908201396 | 4.962725931  | 8.556927273  |
| Al | 16.146761848 | 7.131525708  | 7.297274019  |
| O  | 13.239111527 | 4.931647126  | 9.997627882  |
| O  | 9.124616268  | 6.861473001  | 8.475258708  |
| O  | 13.316238342 | 5.161108465  | 7.356791321  |
| Al | 14.638842581 | 0.983542206  | 8.755243812  |
| Al | 14.692445191 | 0.887129402  | 11.568479213 |
| Al | 14.675732890 | 5.944640032  | 10.027522372 |
| O  | 14.958338837 | 7.024523581  | 11.442793488 |
| O  | 14.733563705 | 7.112088302  | 8.635493121  |
| Al | 10.454159369 | 7.088349466  | 9.961157146  |
| Al | 10.519876261 | 6.949016127  | 7.136770128  |
| Al | 10.565102387 | 2.015212030  | 8.555088707  |
| O  | 10.344148573 | 0.873017541  | 7.188377896  |
| O  | 10.515315032 | 0.885218585  | 10.007302529 |
| Al | 10.474788634 | 3.905016384  | 11.239379584 |
| O  | 10.452414081 | 5.151400583  | 9.931196662  |
| O  | 10.508815824 | 5.082388821  | 7.299560935  |
| Al | 14.582179677 | 3.972545656  | 7.343136488  |
| O  | 14.653612269 | 2.901388218  | 8.790128868  |
| O  | 14.725881926 | 2.985909708  | 11.377668114 |
| H  | 9.362522617  | 0.989967082  | 7.071236880  |
| H  | 13.374358281 | 1.365953801  | 6.726010740  |
| H  | 15.716742921 | 1.439298220  | 6.657938414  |
| H  | 14.639028550 | 7.777877156  | 5.464161234  |
| H  | 12.022830683 | 6.148432824  | 5.516099472  |
| H  | 9.088100227  | 6.669368143  | 5.095211759  |
| H  | 14.368014098 | 3.116235590  | 5.117800464  |
| H  | 16.603874615 | 4.893693241  | 6.356961854  |
| O  | 14.723531919 | 7.023059187  | 6.065230465  |
| O  | 11.935710013 | 7.025777917  | 5.927633125  |
| O  | 9.108600644  | 7.176778256  | 5.917334543  |
| O  | 14.646553588 | 2.832138469  | 5.999178608  |
| Al | 0.732698184  | 12.981258586 | 8.529074280  |
| Al | 4.870128830  | 14.988250016 | 7.071398833  |
| O  | 3.503862165  | 15.251349525 | 11.050678909 |
| O  | 7.694449624  | 12.980635633 | 9.755614157  |
| O  | 3.406735532  | 14.866194975 | 8.320009350  |
| O  | 7.723216702  | 12.994796240 | 7.051249763  |
| Al | 4.794990729  | 11.114918785 | 9.975320475  |
| Al | 0.722704009  | 9.151052711  | 11.443519025 |
| O  | 7.636182137  | 8.942241402  | 7.367893735  |
| O  | 3.504566668  | 11.046877136 | 8.564080830  |
| O  | 7.625855375  | 9.270109773  | 10.158532543 |
| O  | 3.518601803  | 10.933755711 | 11.271535767 |
| Al | 7.782495077  | 11.170251447 | 10.014260119 |
| Al | 3.548308600  | 9.066733448  | 11.372239569 |
| O  | 4.991373559  | 8.861946145  | 7.348212915  |
| O  | 0.618346118  | 11.160063068 | 8.701596800  |
| O  | 5.056967387  | 9.190323854  | 10.151314961 |
| O  | 0.707120721  | 11.047964782 | 11.366649227 |
| Al | 3.495071169  | 12.908373718 | 8.369017649  |
| Al | 7.700478487  | 15.087866960 | 7.137507724  |
| O  | 0.792329170  | 15.238584942 | 11.124548217 |
| O  | 4.825085761  | 12.917809394 | 9.766606881  |

|    |              |              |              |
|----|--------------|--------------|--------------|
| O  | 0.776602937  | 14.919721154 | 8.345394645  |
| O  | 4.899700351  | 13.076435858 | 7.122032302  |
| Al | 6.319253847  | 9.032544558  | 8.692787918  |
| Al | 6.328976557  | 8.971270951  | 11.511319786 |
| Al | 6.217848837  | 13.971458045 | 9.855011507  |
| O  | 6.480873487  | 15.027158719 | 11.284936676 |
| O  | 6.301341044  | 15.108794271 | 8.444227683  |
| Al | 2.160912498  | 15.084423540 | 9.802722113  |
| Al | 2.095274133  | 14.914850732 | 6.973775537  |
| Al | 1.998775031  | 10.087114654 | 8.601051815  |
| O  | 2.110135106  | 8.950556085  | 7.191355844  |
| O  | 2.046971886  | 8.950878903  | 10.006191418 |
| Al | 2.167355505  | 12.082235241 | 11.351856814 |
| O  | 2.102149467  | 13.155315696 | 9.830716551  |
| O  | 2.029470225  | 13.053709640 | 7.201273257  |
| Al | 6.203452883  | 11.911195016 | 7.185797841  |
| O  | 6.274428236  | 10.919932516 | 8.698449624  |
| O  | 6.301977937  | 11.068469535 | 11.284562322 |
| H  | 2.339895376  | 9.361465880  | 6.343232764  |
| H  | 4.169305087  | 9.333453042  | 7.576974798  |
| H  | 7.393113222  | 9.555656753  | 6.632026086  |
| H  | 6.348825161  | 14.256988815 | 5.256426154  |
| H  | 3.521666754  | 14.173323639 | 5.258638148  |
| H  | 0.579639193  | 15.636448571 | 5.049855963  |
| H  | 5.720120336  | 10.275567340 | 5.658503124  |
| H  | 8.283527150  | 12.770594276 | 6.279426791  |
| O  | 6.317667059  | 15.019718552 | 5.851382782  |
| O  | 3.494849045  | 15.010840248 | 5.751127664  |
| O  | 0.621033773  | 15.086736942 | 5.842780285  |
| O  | 6.464662904  | 10.893105036 | 5.768118524  |
| Al | 9.139936728  | 12.967587259 | 8.538415556  |
| Al | 13.256353284 | 15.075685758 | 7.218163730  |
| O  | 11.841068854 | 15.264597914 | 11.273550981 |
| O  | 16.131062352 | 13.063243002 | 9.840038971  |
| O  | 11.776672383 | 14.919517113 | 8.467779375  |
| O  | 16.129689225 | 13.075463056 | 7.127597062  |
| Al | 13.223505563 | 11.157785402 | 10.102485342 |
| Al | 9.080029182  | 9.179108608  | 11.411869042 |
| O  | 16.104553556 | 8.945897300  | 7.518842634  |
| O  | 11.937709747 | 11.082373854 | 8.710409185  |
| O  | 16.024400836 | 9.272211207  | 10.248229922 |
| O  | 11.927487400 | 10.969290139 | 11.421507876 |
| Al | 16.209177343 | 11.195375584 | 10.095668623 |
| Al | 11.973537447 | 9.093002393  | 11.426281014 |
| O  | 13.417029057 | 8.886693875  | 7.435761929  |
| O  | 9.043478140  | 11.140892180 | 8.644192437  |
| O  | 13.468597237 | 9.210448191  | 10.244563316 |
| O  | 9.108029352  | 11.046320402 | 11.352037746 |
| Al | 11.911661622 | 12.949743615 | 8.485152291  |
| Al | 16.137812740 | 15.226517427 | 7.217245440  |
| O  | 9.127948437  | 15.249905636 | 11.198951061 |
| O  | 13.231864565 | 12.976689346 | 9.914917186  |
| O  | 9.122824336  | 14.861667094 | 8.394631083  |
| O  | 13.323193688 | 13.155772222 | 7.275445985  |
| Al | 14.735282195 | 9.058990273  | 8.795922303  |
| Al | 14.755744677 | 8.933660864  | 11.617107328 |
| Al | 14.642009509 | 14.012181995 | 9.923045039  |
| O  | 14.492017060 | 15.087806926 | 11.364949699 |
| O  | 14.720852760 | 15.170930366 | 8.558173880  |
| Al | 10.520618727 | 15.096693531 | 9.869528090  |
| Al | 10.495226507 | 14.970132507 | 7.055245697  |



|    |              |              |              |
|----|--------------|--------------|--------------|
| Al | 10.453510316 | 10.115379758 | 8.648903446  |
| O  | 10.525015892 | 8.960976182  | 7.266576274  |
| O  | 10.494891246 | 9.025222816  | 10.077113082 |
| Al | 10.541409763 | 12.079996940 | 11.363499881 |
| O  | 10.506197215 | 13.169715473 | 9.911665639  |
| O  | 10.504527524 | 13.070185078 | 7.282992891  |
| Al | 14.625272604 | 11.985828002 | 7.302057405  |
| O  | 14.707965076 | 10.973793079 | 8.802112300  |
| O  | 14.720664929 | 11.130428156 | 11.373887613 |
| H  | 9.946913077  | 9.254108890  | 6.541222945  |
| H  | 12.597932234 | 9.402952877  | 7.536675491  |
| H  | 15.946089921 | 9.605923668  | 6.806058652  |
| H  | 14.720642478 | 14.456692358 | 5.338939641  |
| H  | 11.956302739 | 14.230479753 | 5.390320288  |
| H  | 9.047331747  | 15.584746528 | 5.114717251  |
| H  | 14.227840549 | 10.328858041 | 5.763620335  |
| H  | 16.658350022 | 12.827472505 | 6.340380063  |
| O  | 14.716833886 | 15.168085458 | 5.995410920  |
| O  | 11.919462988 | 15.083785478 | 5.856061021  |
| O  | 9.051447992  | 14.940370127 | 5.837906489  |
| O  | 14.948347364 | 10.965309995 | 5.913584065  |
| O  | 7.702369167  | 9.195809987  | 12.713033532 |
| H  | 7.779824521  | 8.487582411  | 13.374052389 |
| H  | 14.657560728 | 11.746515237 | 12.120570633 |
| O  | 13.328075119 | 9.028625136  | 12.783487783 |
| O  | 10.515615840 | 9.025771415  | 12.738354330 |
| O  | -0.627858199 | 9.031985125  | 12.791911200 |
| H  | -0.588192087 | 9.782645100  | 13.402426658 |
| O  | 2.414863868  | 13.234286999 | 12.648349703 |
| O  | 10.588015123 | 13.313288286 | 12.649470670 |
| H  | 7.486718730  | 14.962096077 | 11.323339459 |
| H  | 13.495827993 | 15.003019070 | 11.493384652 |
| H  | 3.345343205  | 14.592354283 | 11.772027988 |
| H  | 11.536312329 | 14.711294329 | 12.035944992 |
| O  | 1.873471185  | 5.002888581  | 12.791862512 |
| H  | 7.557712861  | 6.951308033  | 11.446589099 |
| H  | 4.144294407  | 6.556843217  | 11.090296224 |
| H  | 15.967274446 | 6.950743897  | 11.498018020 |
| O  | 7.701471968  | 0.967246719  | 12.638752973 |
| H  | 7.780945079  | 0.315824462  | 13.348641090 |
| O  | -0.698612510 | 0.886150252  | 12.710822568 |
| H  | -0.617660436 | 0.113714675  | 13.290218876 |
| H  | 6.341003166  | 3.460746704  | 12.075180416 |
| O  | 4.901139407  | 0.816646064  | 12.641201041 |
| O  | 2.097600556  | 0.881567056  | 12.563024294 |
| H  | 14.818016813 | 3.590805161  | 12.131618613 |
| O  | 13.262792736 | 0.890779825  | 12.783097346 |
| O  | 10.440158323 | 0.964362893  | 12.641611933 |
| O  | 2.170702089  | 9.115400078  | 12.640062861 |
| O  | 4.913987910  | 8.943780162  | 12.698222810 |
| H  | 2.169319634  | 8.324774257  | 13.201077887 |
| H  | 4.861673116  | 9.669416872  | 13.337607482 |
| H  | 13.192419896 | 8.208944137  | 13.303192205 |
| H  | 10.542772434 | 9.658517251  | 13.473153815 |
| H  | 13.252194400 | 1.615358747  | 13.425851106 |
| H  | 10.386246625 | 1.715943976  | 13.251759239 |
| H  | 2.093982085  | 1.623745908  | 13.187582583 |
| H  | 4.807814453  | -0.010418789 | 13.137904901 |
| H  | 9.451863817  | 14.745655050 | 11.980742256 |
| H  | 10.668861253 | 13.055280531 | 13.577474156 |
| H  | 1.715261809  | 13.909921344 | 12.693441847 |

|   |              |              |              |
|---|--------------|--------------|--------------|
| H | 0.051218210  | 14.641350078 | 10.921885789 |
| H | 1.073194128  | 6.578592451  | 12.007091498 |
| H | 2.696361486  | 5.429507012  | 13.077419655 |
| H | 6.301143257  | 11.676035654 | 12.040889202 |
| W | 10.524306112 | 6.671963200  | 12.934869606 |
| O | 10.449216077 | 4.926161132  | 12.728848736 |
| O | 9.202209425  | 7.264502494  | 11.440924193 |
| H | 12.082453801 | 7.005908185  | 13.530728003 |
| C | 8.748128784  | 6.907151714  | 14.207821926 |
| H | 8.635522370  | 7.918967897  | 14.636950751 |
| C | 10.767127504 | 6.542611974  | 15.143550601 |
| C | 9.322111880  | 6.056119970  | 15.345935069 |
| C | 11.971648356 | 5.783050450  | 15.746771471 |
| H | 12.877577794 | 6.251714373  | 15.324119071 |
| C | 12.029391009 | 4.291217631  | 15.387164120 |
| H | 12.120810229 | 4.134703206  | 14.304461677 |
| H | 12.890405611 | 3.815994644  | 15.880372537 |
| H | 11.123937472 | 3.765799878  | 15.728399109 |
| C | 12.051635904 | 5.958424441  | 17.275003731 |
| H | 13.004212442 | 5.564267337  | 17.660254135 |
| H | 11.983480522 | 7.018093743  | 17.560598800 |
| H | 11.241293538 | 5.421149426  | 17.786842353 |
| H | 7.803988551  | 6.569889260  | 13.752135437 |
| H | 10.814296210 | 7.584660202  | 15.514625626 |
| H | 9.248825562  | 4.989819228  | 15.071938307 |
| C | 8.650659063  | 6.251618738  | 16.716232877 |
| H | 9.155057189  | 5.627132181  | 17.469686171 |
| H | 8.802487718  | 7.299165789  | 17.030503506 |
| C | 7.155641977  | 5.921498922  | 16.697597385 |
| H | 6.985797696  | 4.877865368  | 16.391957929 |
| H | 6.612976727  | 6.563136667  | 15.988663484 |
| H | 6.699066717  | 6.057451681  | 17.688118381 |

**1-butene (2,1) insertion (side path) into species 1. E: -2356.8789930070**

|    |             |             |              |
|----|-------------|-------------|--------------|
| Al | 0.723681081 | 4.903185064 | 8.589808156  |
| Al | 4.871245095 | 6.974045321 | 7.184297860  |
| O  | 3.415651379 | 7.192603702 | 11.204194464 |
| O  | 7.699416716 | 4.857340401 | 9.761018498  |
| O  | 3.397220196 | 6.845288336 | 8.432919722  |
| O  | 7.775231359 | 5.005858285 | 7.117825354  |
| Al | 4.786187942 | 3.072783324 | 10.032176728 |
| Al | 0.664080956 | 0.966761027 | 11.342332411 |
| O  | 7.629662995 | 0.808358461 | 7.279908959  |
| O  | 3.511313799 | 3.062150242 | 8.644344724  |
| O  | 7.573343592 | 1.127486888 | 10.080890789 |
| O  | 3.508989996 | 2.884963745 | 11.349655892 |
| Al | 7.771410790 | 3.025385004 | 9.938381616  |
| Al | 3.511961399 | 0.974919818 | 11.336375024 |
| O  | 4.993080293 | 0.729355547 | 7.213296644  |
| O  | 0.618569612 | 3.070487945 | 8.640443914  |
| O  | 4.995974857 | 1.133419337 | 10.084294894 |
| O  | 0.688829088 | 2.840955001 | 11.284727492 |
| Al | 3.491204535 | 4.896162667 | 8.468763483  |
| Al | 7.738385775 | 7.117052455 | 7.193102079  |
| O  | 0.766552526 | 7.189341821 | 11.287678734 |
| O  | 4.841950553 | 4.933549871 | 9.928057711  |
| O  | 0.774113036 | 6.850974057 | 8.473377884  |
| O  | 4.912555480 | 5.082808093 | 7.268614965  |
| Al | 6.240561190 | 0.944941579 | 8.614524764  |
| Al | 6.286934258 | 0.839252658 | 11.440329053 |
| Al | 6.308655912 | 5.929088003 | 9.894833075  |

|    |              |             |              |
|----|--------------|-------------|--------------|
| O  | 6.544418870  | 7.083717640 | 11.279953304 |
| O  | 6.325745838  | 7.087401396 | 8.500294044  |
| Al | 2.077464044  | 7.020080456 | 9.905613584  |
| Al | 2.094469873  | 6.872563354 | 7.072491046  |
| Al | 2.047407501  | 2.053300899 | 8.573391294  |
| O  | 2.186868062  | 0.954964451 | 7.126893914  |
| O  | 2.102688028  | 0.876629758 | 9.928677551  |
| Al | 2.074677186  | 3.951719619 | 11.383460635 |
| O  | 2.097053656  | 5.088262288 | 9.918776448  |
| O  | 2.038849549  | 5.009107169 | 7.284459513  |
| Al | 6.221637634  | 3.924416356 | 7.191889179  |
| O  | 6.256598715  | 2.855252442 | 8.654254044  |
| O  | 6.300999917  | 2.912143025 | 11.275608248 |
| H  | 1.921416110  | 1.381158837 | 6.297280261  |
| H  | 4.109674563  | 1.141488464 | 7.280640656  |
| H  | 7.336600484  | 1.402151993 | 6.543339336  |
| H  | 6.271714472  | 7.686039960 | 5.308425072  |
| H  | 3.572866048  | 6.206260573 | 5.317674646  |
| H  | 0.614380826  | 7.600411190 | 5.206309693  |
| H  | 5.884462941  | 2.435508778 | 5.407129761  |
| H  | 8.272830766  | 4.718955113 | 6.326502265  |
| O  | 6.318797910  | 6.944929412 | 5.931282117  |
| O  | 3.503726129  | 7.021170649 | 5.843171298  |
| O  | 0.625660890  | 6.947147178 | 5.919056699  |
| O  | 6.606700926  | 2.976759629 | 5.764266773  |
| Al | 9.152696895  | 4.913549728 | 8.567982445  |
| Al | 13.292086681 | 7.052058141 | 7.310930795  |
| O  | 11.668013781 | 7.257455785 | 11.369753521 |
| O  | 16.116762218 | 4.908404809 | 9.837685806  |
| O  | 11.782660144 | 6.930968950 | 8.554962595  |
| O  | 16.116387376 | 5.060291991 | 7.191333044  |
| Al | 13.204614561 | 3.097166398 | 10.111943768 |
| Al | 9.073928944  | 1.032942559 | 11.340992422 |
| O  | 15.977536166 | 0.890076371 | 7.433066618  |
| O  | 11.925127857 | 3.124682047 | 8.737438172  |
| O  | 15.951374060 | 1.130470124 | 10.170898739 |
| O  | 11.917302689 | 2.893152981 | 11.428062424 |
| Al | 16.188149585 | 3.057496426 | 10.028399626 |
| Al | 11.895874726 | 1.016486067 | 11.446594915 |
| O  | 13.249334164 | 0.792063286 | 7.508156093  |
| O  | 9.114287048  | 3.063926095 | 8.639007752  |
| O  | 13.396169906 | 1.150192065 | 10.235878476 |
| O  | 9.053567954  | 2.902179679 | 11.284804549 |
| Al | 11.920184783 | 4.964720199 | 8.572437089  |
| Al | 16.151177383 | 7.132711680 | 7.296613749  |
| O  | 13.241023526 | 4.929050673 | 9.999096964  |
| O  | 9.127440091  | 6.862732582 | 8.480427234  |
| O  | 13.316646484 | 5.166536658 | 7.358200420  |
| Al | 14.637901240 | 0.978061268 | 8.758739217  |
| Al | 14.692559628 | 0.880247373 | 11.575262613 |
| Al | 14.677018637 | 5.944637903 | 10.029638255 |
| O  | 14.958160828 | 7.025554334 | 11.443445551 |
| O  | 14.736227435 | 7.116385859 | 8.637947117  |
| Al | 10.459993342 | 7.091802223 | 9.963091875  |
| Al | 10.532569264 | 6.953479515 | 7.139931325  |
| Al | 10.562844448 | 2.019171803 | 8.560035630  |
| O  | 10.345425013 | 0.875669558 | 7.190786661  |
| O  | 10.515022258 | 0.884393543 | 10.008359361 |
| Al | 10.493123354 | 3.910885923 | 11.287915105 |
| O  | 10.449465135 | 5.156874819 | 9.983958262  |
| O  | 10.515080050 | 5.086795616 | 7.346631515  |

|    |              |              |              |
|----|--------------|--------------|--------------|
| Al | 14.578748506 | 3.973718624  | 7.343951070  |
| O  | 14.651647250 | 2.898598612  | 8.791882553  |
| O  | 14.723641332 | 2.982444005  | 11.373701546 |
| H  | 9.364142660  | 0.992098087  | 7.072130658  |
| H  | 13.377871110 | 1.362212763  | 6.725861502  |
| H  | 15.713748671 | 1.432729231  | 6.659421243  |
| H  | 14.643029669 | 7.782304511  | 5.468642396  |
| H  | 12.085893384 | 6.232233015  | 5.482530841  |
| H  | 9.083573849  | 6.666562787  | 5.097283607  |
| H  | 14.363592329 | 3.114607397  | 5.119556878  |
| H  | 16.602831161 | 4.891444990  | 6.357547493  |
| O  | 14.726175796 | 7.025888143  | 6.068167856  |
| O  | 11.975279575 | 7.084623290  | 5.938294055  |
| O  | 9.114055335  | 7.174598804  | 5.918922122  |
| O  | 14.646467909 | 2.832191726  | 6.000106268  |
| Al | 0.733598390  | 12.990882539 | 8.557282090  |
| Al | 4.869767088  | 14.989279440 | 7.070804514  |
| O  | 3.505397206  | 15.252185860 | 11.052858537 |
| O  | 7.692497044  | 12.981894769 | 9.755133659  |
| O  | 3.408123892  | 14.867939288 | 8.322179951  |
| O  | 7.722840730  | 12.995057697 | 7.050870226  |
| Al | 4.790029539  | 11.115608812 | 9.970928860  |
| Al | 0.724210636  | 9.149217910  | 11.446638784 |
| O  | 7.636251935  | 8.941686450  | 7.368648416  |
| O  | 3.502096616  | 11.048040639 | 8.563417614  |
| O  | 7.624805894  | 9.276283737  | 10.157928611 |
| O  | 3.519477871  | 10.936144860 | 11.272299847 |
| Al | 7.781214477  | 11.173662305 | 10.009519272 |
| Al | 3.548510832  | 9.067532681  | 11.371091210 |
| O  | 4.990705723  | 8.862013467  | 7.347954730  |
| O  | 0.616456033  | 11.176525519 | 8.712672567  |
| O  | 5.054400298  | 9.194786920  | 10.150918361 |
| O  | 0.711101692  | 11.044893553 | 11.372674501 |
| Al | 3.494120228  | 12.910131026 | 8.368997609  |
| Al | 7.700305407  | 15.088900058 | 7.137193323  |
| O  | 0.794625957  | 15.238928348 | 11.129239855 |
| O  | 4.825269658  | 12.918590138 | 9.766924506  |
| O  | 0.776457582  | 14.922275605 | 8.381743067  |
| O  | 4.898598987  | 13.077124237 | 7.121890178  |
| Al | 6.317761503  | 9.033456447  | 8.692904952  |
| Al | 6.326096904  | 8.998866148  | 11.513974797 |
| Al | 6.216558642  | 13.975054567 | 9.855243844  |
| O  | 6.481389235  | 15.033076641 | 11.284150058 |
| O  | 6.301422685  | 15.110348092 | 8.443115437  |
| Al | 2.162134419  | 15.087483326 | 9.809453042  |
| Al | 2.094426742  | 14.917995377 | 6.983336444  |
| Al | 1.991637810  | 10.092848190 | 8.602269727  |
| O  | 2.109843595  | 8.952320934  | 7.193067725  |
| O  | 2.044560751  | 8.951889008  | 10.005677147 |
| Al | 2.168375253  | 12.082262186 | 11.356524560 |
| O  | 2.105650113  | 13.155669857 | 9.836289184  |
| O  | 2.024265422  | 13.058918618 | 7.206583217  |
| Al | 6.202206655  | 11.912480294 | 7.184120248  |
| O  | 6.267981449  | 10.922023714 | 8.697198583  |
| O  | 6.302011275  | 11.068348460 | 11.287049069 |
| H  | 2.340391019  | 9.363435185  | 6.345177936  |
| H  | 4.166627567  | 9.330095231  | 7.576863118  |
| H  | 7.395497106  | 9.555296869  | 6.632385516  |
| H  | 6.348059574  | 14.258469379 | 5.254827228  |
| H  | 3.515300330  | 14.173394956 | 5.261855666  |
| H  | 0.570455399  | 15.656508183 | 5.078268630  |

|    |              |              |              |
|----|--------------|--------------|--------------|
| H  | 5.720977337  | 10.273982789 | 5.660402036  |
| H  | 8.283211491  | 12.770692080 | 6.279149742  |
| O  | 6.317546300  | 15.020059137 | 5.851238186  |
| O  | 3.492747724  | 15.011681771 | 5.753198488  |
| O  | 0.618788169  | 15.084091426 | 5.854654194  |
| O  | 6.464621109  | 10.893071375 | 5.767954121  |
| Al | 9.139749884  | 12.968813863 | 8.537473868  |
| Al | 13.255971277 | 15.073065153 | 7.220927754  |
| O  | 11.839481115 | 15.259868282 | 11.276025257 |
| O  | 16.133676832 | 13.068050248 | 9.903932908  |
| O  | 11.776394413 | 14.918872311 | 8.468567974  |
| O  | 16.129588364 | 13.078775022 | 7.183207212  |
| Al | 13.225234944 | 11.157207733 | 10.114373024 |
| Al | 9.076130138  | 9.193001517  | 11.406537966 |
| O  | 16.116482593 | 8.948052980  | 7.521219644  |
| O  | 11.938887853 | 11.075451417 | 8.712981498  |
| O  | 16.024273916 | 9.275353959  | 10.253220328 |
| O  | 11.924093820 | 10.967064750 | 11.424030821 |
| Al | 16.207029768 | 11.203687977 | 10.118151746 |
| Al | 11.969298601 | 9.087512881  | 11.434231942 |
| O  | 13.461716571 | 8.933444155  | 7.436710318  |
| O  | 9.042440287  | 11.142879464 | 8.643030770  |
| O  | 13.468700303 | 9.213192684  | 10.248622453 |
| O  | 9.104825369  | 11.051564388 | 11.351516527 |
| Al | 11.912035165 | 12.947661802 | 8.486739141  |
| Al | 16.137748991 | 15.222816996 | 7.235251435  |
| O  | 9.127527650  | 15.250021846 | 11.198846607 |
| O  | 13.234294672 | 12.976651761 | 9.917947785  |
| O  | 9.122873079  | 14.861818923 | 8.394654158  |
| O  | 13.321867936 | 13.154668926 | 7.275938689  |
| Al | 14.755658476 | 9.068063648  | 8.807092442  |
| Al | 14.752840399 | 8.937497153  | 11.626543878 |
| Al | 14.641478585 | 14.020555630 | 9.955775471  |
| O  | 14.495181034 | 15.079876495 | 11.423300916 |
| O  | 14.720614315 | 15.167349701 | 8.568525301  |
| Al | 10.520752002 | 15.096370488 | 9.869695367  |
| Al | 10.495850991 | 14.970976749 | 7.055982392  |
| Al | 10.449193884 | 10.113894603 | 8.646945553  |
| O  | 10.524609945 | 8.960365859  | 7.267584227  |
| O  | 10.458734607 | 9.024975697  | 10.075785346 |
| Al | 10.540142341 | 12.080595241 | 11.364602385 |
| O  | 10.506521051 | 13.168481072 | 9.911622880  |
| O  | 10.504990407 | 13.069849904 | 7.283437053  |
| Al | 14.622677185 | 11.984753464 | 7.312815470  |
| O  | 14.712017911 | 10.980120015 | 8.816049373  |
| O  | 14.719165870 | 11.123025064 | 11.417120513 |
| H  | 9.954360716  | 9.252980692  | 6.536169485  |
| H  | 12.648073482 | 9.453883617  | 7.568968959  |
| H  | 15.951704802 | 9.607595400  | 6.809293324  |
| H  | 14.725194625 | 14.453992056 | 5.344850360  |
| H  | 11.956182880 | 14.230542421 | 5.391034527  |
| H  | 9.048249422  | 15.584951764 | 5.114687744  |
| H  | 14.236503121 | 10.325008532 | 5.784177273  |
| H  | 16.665288973 | 12.828781362 | 6.399439805  |
| O  | 14.719347756 | 15.166569212 | 6.000278293  |
| O  | 11.919836292 | 15.083675030 | 5.857175846  |
| O  | 9.052047892  | 14.940997353 | 5.838269185  |
| O  | 14.952376664 | 10.970820980 | 5.918353560  |
| O  | 7.709667028  | 9.194672191  | 12.719750845 |
| H  | 7.803972337  | 8.453847658  | 13.345314187 |
| H  | 14.652958605 | 11.740709855 | 12.161901790 |

|   |              |              |              |
|---|--------------|--------------|--------------|
| O | 13.324548458 | 9.026365276  | 12.789321718 |
| O | 10.501911448 | 9.027846871  | 12.730732345 |
| O | -0.626664459 | 9.030725556  | 12.793988144 |
| H | -0.585109053 | 9.780674688  | 13.405197792 |
| O | 2.415135332  | 13.235231404 | 12.650582186 |
| O | 10.587615652 | 13.313227795 | 12.650352902 |
| H | 7.487297105  | 14.967184479 | 11.321902522 |
| H | 13.499322516 | 14.999063987 | 11.543816489 |
| H | 3.345970391  | 14.594147209 | 11.774891071 |
| H | 11.527794137 | 14.706144430 | 12.035766246 |
| O | 1.873889783  | 5.002509473  | 12.792518655 |
| H | 7.543277157  | 6.994178959  | 11.444195319 |
| H | 4.141239647  | 6.553842407  | 11.098282833 |
| H | 15.966658140 | 6.951601493  | 11.501155469 |
| O | 7.702585055  | 0.968418060  | 12.639039450 |
| H | 7.780426800  | 0.318038736  | 13.349992959 |
| O | -0.697515098 | 0.887178029  | 12.713056459 |
| H | -0.616513519 | 0.113411044  | 13.290788696 |
| H | 6.346390786  | 3.461773406  | 12.075194473 |
| O | 4.901536504  | 0.817598636  | 12.641554142 |
| O | 2.098251917  | 0.882380772  | 12.563589434 |
| H | 14.800403038 | 3.589934681  | 12.127219249 |
| O | 13.260006460 | 0.892103487  | 12.787558628 |
| O | 10.440129223 | 0.962785850  | 12.641874348 |
| O | 2.172117051  | 9.114670333  | 12.640906604 |
| O | 4.913143369  | 8.948211844  | 12.702196266 |
| H | 2.173863610  | 8.321592437  | 13.198681788 |
| H | 4.846712414  | 9.668214579  | 13.346678183 |
| H | 13.184703839 | 8.208076249  | 13.309744700 |
| H | 10.529404074 | 9.646366675  | 13.477467104 |
| H | 13.246543019 | 1.629705090  | 13.414844365 |
| H | 10.385428620 | 1.710525351  | 13.255966882 |
| H | 2.093933707  | 1.623786480  | 13.189066754 |
| H | 4.809569071  | -0.010424382 | 13.136810202 |
| H | 9.449319176  | 14.745903958 | 11.981342799 |
| H | 10.670948620 | 13.054545547 | 13.577996673 |
| H | 1.715992936  | 13.911394839 | 12.695772389 |
| H | 0.063319668  | 14.625938972 | 10.933630320 |
| H | 1.078026918  | 6.580695474  | 12.008121554 |
| H | 2.701439128  | 5.399165052  | 13.106126611 |
| H | 6.298064454  | 11.678956758 | 12.041096342 |
| W | 10.467349664 | 6.667842187  | 12.926717449 |
| O | 10.600890305 | 4.915848648  | 12.808111862 |
| O | 9.197029995  | 7.265357011  | 11.443012332 |
| H | 11.993823458 | 7.062375289  | 13.561469136 |
| C | 8.545871525  | 6.362245642  | 14.077089732 |
| H | 7.909997558  | 7.248873869  | 14.251097044 |
| C | 10.490028936 | 7.029832769  | 15.115579730 |
| C | 9.295732763  | 6.117285041  | 15.392153239 |
| C | 11.753227485 | 6.869165873  | 15.978980167 |
| H | 12.487633054 | 7.614541374  | 15.622502537 |
| C | 12.402606416 | 5.484838233  | 15.853493890 |
| H | 12.662336932 | 5.258131582  | 14.809896241 |
| H | 13.322083609 | 5.428981539  | 16.453546794 |
| H | 11.724826037 | 4.695694537  | 16.212120897 |
| C | 11.446006343 | 7.185436104  | 17.452345091 |
| H | 12.358664949 | 7.146620096  | 18.065505509 |
| H | 11.004911038 | 8.187302831  | 17.563411871 |
| H | 10.733468153 | 6.458385849  | 17.870187664 |
| H | 10.133092065 | 8.072247820  | 15.220052324 |
| H | 9.616956520  | 5.064763920  | 15.439040464 |

|   |             |             |              |
|---|-------------|-------------|--------------|
| H | 8.732042177 | 6.323153852 | 16.322331829 |
| C | 7.654971830 | 5.214413453 | 13.583013730 |
| H | 7.610217412 | 5.204947880 | 12.484671281 |
| H | 8.144056398 | 4.264369932 | 13.852032953 |
| C | 6.229704891 | 5.258871157 | 14.150918539 |
| H | 5.705302773 | 6.158940412 | 13.797819024 |
| H | 6.242291566 | 5.275774201 | 15.250635335 |
| H | 5.627749864 | 4.383794692 | 13.851658080 |

**isobutene (1,2) insertion (side path) into species 1. E: -2356.877739202**

|    |             |             |              |
|----|-------------|-------------|--------------|
| Al | 0.723161804 | 4.903130801 | 8.589541033  |
| Al | 4.871356408 | 6.973633251 | 7.186168835  |
| O  | 3.415544966 | 7.189625062 | 11.204221519 |
| O  | 7.705941417 | 4.851118590 | 9.754358346  |
| O  | 3.396513399 | 6.844922572 | 8.434145239  |
| O  | 7.771523486 | 5.004691489 | 7.113210061  |
| Al | 4.783822355 | 3.070407585 | 10.030727373 |
| Al | 0.663799593 | 0.966370426 | 11.342171993 |
| O  | 7.629644990 | 0.807617114 | 7.279978463  |
| O  | 3.510473080 | 3.061372354 | 8.643509108  |
| O  | 7.571678185 | 1.126539213 | 10.080669859 |
| O  | 3.508191431 | 2.884102973 | 11.349034125 |
| Al | 7.771749162 | 3.024498257 | 9.934211103  |
| Al | 3.511266843 | 0.974416548 | 11.336528777 |
| O  | 4.993009104 | 0.728586620 | 7.213252861  |
| O  | 0.618306694 | 3.070517710 | 8.640660626  |
| O  | 4.995688067 | 1.132705827 | 10.084727674 |
| O  | 0.688507929 | 2.840699058 | 11.285164823 |
| Al | 3.490288329 | 4.895603918 | 8.469077101  |
| Al | 7.738594956 | 7.120033224 | 7.192429448  |
| O  | 0.765675170 | 7.189287541 | 11.287297043 |
| O  | 4.839902835 | 4.930087635 | 9.925848985  |
| O  | 0.773742975 | 6.850913475 | 8.473221019  |
| O  | 4.911986354 | 5.082525379 | 7.268558699  |
| Al | 6.240063068 | 0.941906544 | 8.614742186  |
| Al | 6.286546693 | 0.833686451 | 11.440046908 |
| Al | 6.313991363 | 5.913395012 | 9.890298624  |
| O  | 6.552170183 | 7.026026605 | 11.295400069 |
| O  | 6.326870668 | 7.085580171 | 8.503652917  |
| Al | 2.075702926 | 7.019964567 | 9.904945363  |
| Al | 2.094381376 | 6.872671888 | 7.072543099  |
| Al | 2.046468814 | 2.052653432 | 8.572986997  |
| O  | 2.187009326 | 0.954570932 | 7.126790770  |
| O  | 2.102416640 | 0.876285055 | 9.928617697  |
| Al | 2.073731557 | 3.951380499 | 11.382836996 |
| O  | 2.096723526 | 5.088047145 | 9.918498391  |
| O  | 2.038632510 | 5.009028668 | 7.284404827  |
| Al | 6.217597452 | 3.921206248 | 7.191443244  |
| O  | 6.254616712 | 2.850551384 | 8.652644528  |
| O  | 6.300684895 | 2.913264807 | 11.275863439 |
| H  | 1.924646237 | 1.380829861 | 6.296236337  |
| H  | 4.109209147 | 1.139719358 | 7.281889974  |
| H  | 7.335562464 | 1.400463845 | 6.543213007  |
| H  | 6.270602806 | 7.686008884 | 5.309272433  |
| H  | 3.573054285 | 6.206244538 | 5.318044521  |
| H  | 0.614703259 | 7.601187026 | 5.206969403  |
| H  | 5.885031000 | 2.434577493 | 5.403911279  |
| H  | 8.259184975 | 4.724320701 | 6.312981852  |
| O  | 6.318598461 | 6.945002841 | 5.932199908  |
| O  | 3.503827412 | 7.021059685 | 5.843644372  |
| O  | 0.625691454 | 6.947116243 | 5.919010662  |

|    |              |              |              |
|----|--------------|--------------|--------------|
| O  | 6.605633358  | 2.976318347  | 5.763533811  |
| Al | 9.152774354  | 4.910160932  | 8.537123286  |
| Al | 13.291581084 | 7.054287488  | 7.309879573  |
| O  | 11.681961052 | 7.257843138  | 11.366153089 |
| O  | 16.116340922 | 4.908585509  | 9.837529348  |
| O  | 11.779543157 | 6.929977253  | 8.549501269  |
| O  | 16.116487562 | 5.060244902  | 7.191155860  |
| Al | 13.205457572 | 3.099008637  | 10.108143873 |
| Al | 9.073220208  | 1.032123799  | 11.340913026 |
| O  | 15.977536116 | 0.890020286  | 7.433106828  |
| O  | 11.923382913 | 3.125110842  | 8.731737510  |
| O  | 15.951647188 | 1.130623625  | 10.170852729 |
| O  | 11.915425416 | 2.891764313  | 11.419394755 |
| Al | 16.187900921 | 3.057966539  | 10.029099202 |
| Al | 11.895887030 | 1.016838163  | 11.445066175 |
| O  | 13.249098220 | 0.792233070  | 7.508076098  |
| O  | 9.117074642  | 3.061485081  | 8.635550650  |
| O  | 13.396692551 | 1.149525039  | 10.234862214 |
| O  | 9.049269565  | 2.901428607  | 11.282069196 |
| Al | 11.912642055 | 4.965159901  | 8.551909368  |
| Al | 16.150945140 | 7.133031581  | 7.296304407  |
| O  | 13.239432106 | 4.929116550  | 9.997659474  |
| O  | 9.127362399  | 6.861313587  | 8.474562323  |
| O  | 13.317602823 | 5.166796666  | 7.356424316  |
| Al | 14.638060245 | 0.977576584  | 8.758899070  |
| Al | 14.692236891 | 0.881213501  | 11.574976261 |
| Al | 14.674960050 | 5.944134527  | 10.028359072 |
| O  | 14.957448871 | 7.025075175  | 11.443221456 |
| O  | 14.735894695 | 7.116974806  | 8.637695793  |
| Al | 10.446963113 | 7.088178256  | 9.963230582  |
| Al | 10.533847152 | 6.957327240  | 7.129126496  |
| Al | 10.564833942 | 2.014055121  | 8.554285900  |
| O  | 10.343826636 | 0.872321000  | 7.187992847  |
| O  | 10.514758294 | 0.884269245  | 10.006874100 |
| Al | 10.490135755 | 3.904341283  | 11.233957203 |
| O  | 10.453437743 | 5.152469065  | 9.927795095  |
| O  | 10.513790791 | 5.087551024  | 7.293419616  |
| Al | 14.579503686 | 3.973910689  | 7.343416912  |
| O  | 14.651577947 | 2.898603955  | 8.791555135  |
| O  | 14.723363099 | 2.982428782  | 11.374365448 |
| H  | 9.362266292  | 0.989222936  | 7.070611189  |
| H  | 13.378987434 | 1.361880071  | 6.725551960  |
| H  | 15.713995388 | 1.432554492  | 6.659301144  |
| H  | 14.642908307 | 7.780155547  | 5.466287563  |
| H  | 12.086746705 | 6.236134206  | 5.478802508  |
| H  | 9.084088831  | 6.663176959  | 5.097661009  |
| H  | 14.360955775 | 3.114295181  | 5.120238178  |
| H  | 16.602762974 | 4.892039989  | 6.357131763  |
| O  | 14.726677235 | 7.025940418  | 6.068422150  |
| O  | 11.981404768 | 7.090381690  | 5.932473315  |
| O  | 9.112340913  | 7.176784631  | 5.915909899  |
| O  | 14.646405219 | 2.832023943  | 6.000034158  |
| Al | 0.733962632  | 12.989381492 | 8.557271395  |
| Al | 4.869590917  | 14.988187020 | 7.071077852  |
| O  | 3.505332467  | 15.252021629 | 11.052790561 |
| O  | 7.693393622  | 12.980252128 | 9.755370961  |
| O  | 3.408268433  | 14.866929370 | 8.322243165  |
| O  | 7.722478943  | 12.994619395 | 7.051254033  |
| Al | 4.793188178  | 11.113116593 | 9.974841242  |
| Al | 0.724451968  | 9.148975156  | 11.446521599 |
| O  | 7.636077843  | 8.942680125  | 7.368417462  |



|    |              |              |              |
|----|--------------|--------------|--------------|
| O  | 3.502665735  | 11.047086554 | 8.564094911  |
| O  | 7.623168570  | 9.269701757  | 10.159380171 |
| O  | 3.517955706  | 10.924456501 | 11.271774220 |
| Al | 7.781315604  | 11.169794116 | 10.014960967 |
| Al | 3.548454231  | 9.062555901  | 11.371905063 |
| O  | 4.990919560  | 8.861301285  | 7.348095083  |
| O  | 0.616464599  | 11.173963362 | 8.712604297  |
| O  | 5.056016518  | 9.188610185  | 10.150843305 |
| O  | 0.711103076  | 11.044621794 | 11.372854828 |
| Al | 3.494615074  | 12.908610169 | 8.369654456  |
| Al | 7.700146890  | 15.087467069 | 7.137813823  |
| O  | 0.794665511  | 15.238540320 | 11.129365648 |
| O  | 4.824484639  | 12.917115210 | 9.767308343  |
| O  | 0.776635607  | 14.921999742 | 8.381880655  |
| O  | 4.898937913  | 13.076609178 | 7.122107497  |
| Al | 6.318120074  | 9.031826748  | 8.692841556  |
| Al | 6.326874478  | 8.970447893  | 11.510552717 |
| Al | 6.217032788  | 13.971248716 | 9.855449034  |
| O  | 6.480956575  | 15.027669925 | 11.284901595 |
| O  | 6.301486179  | 15.109078969 | 8.445119548  |
| Al | 2.162149319  | 15.086654907 | 9.809333988  |
| Al | 2.094464187  | 14.917157376 | 6.983476114  |
| Al | 1.992538764  | 10.091723186 | 8.602501802  |
| O  | 2.109840782  | 8.951985402  | 7.192791336  |
| O  | 2.043443038  | 8.950693591  | 10.005609902 |
| Al | 2.170937995  | 12.078381931 | 11.356389544 |
| O  | 2.105872469  | 13.154662402 | 9.836629193  |
| O  | 2.024382004  | 13.058361636 | 7.206815416  |
| Al | 6.201985253  | 11.910809642 | 7.185874419  |
| O  | 6.267261992  | 10.918854392 | 8.698237618  |
| O  | 6.300955085  | 11.068638404 | 11.284373119 |
| H  | 2.346698028  | 9.362180017  | 6.346194568  |
| H  | 4.167968430  | 9.330241836  | 7.579477544  |
| H  | 7.394023422  | 9.556179981  | 6.632337322  |
| H  | 6.348037802  | 14.257354848 | 5.256272674  |
| H  | 3.515121500  | 14.173717698 | 5.261093585  |
| H  | 0.570619663  | 15.657178513 | 5.078896560  |
| H  | 5.720511262  | 10.274949167 | 5.658760690  |
| H  | 8.282179527  | 12.770133315 | 6.279084255  |
| O  | 6.317415053  | 15.019816725 | 5.851619825  |
| O  | 3.492713158  | 15.011533373 | 5.753242873  |
| O  | 0.618784482  | 15.084054298 | 5.854769448  |
| O  | 6.464614257  | 10.893097080 | 5.768180043  |
| Al | 9.138991484  | 12.967076639 | 8.538023069  |
| Al | 13.255811071 | 15.072877643 | 7.220846953  |
| O  | 11.839323069 | 15.260061706 | 11.275843015 |
| O  | 16.133994989 | 13.067883666 | 9.903499448  |
| O  | 11.776119385 | 14.918817324 | 8.468277554  |
| O  | 16.129752814 | 13.078675612 | 7.183173976  |
| Al | 13.226648150 | 11.158905501 | 10.112662833 |
| Al | 9.074769883  | 9.176351549  | 11.415108887 |
| O  | 16.116853174 | 8.948149352  | 7.521116540  |
| O  | 11.938297650 | 11.074916292 | 8.713098870  |
| O  | 16.024619471 | 9.275197701  | 10.252842660 |
| O  | 11.924588179 | 10.968801015 | 11.421989424 |
| Al | 16.207593664 | 11.203486463 | 10.117857542 |
| Al | 11.970917624 | 9.093588685  | 11.427007954 |
| O  | 13.462250392 | 8.935643741  | 7.436768391  |
| O  | 9.041793079  | 11.141563555 | 8.643962319  |
| O  | 13.469253105 | 9.213978584  | 10.247134759 |
| O  | 9.105798366  | 11.046507980 | 11.353022845 |

|    |              |              |              |
|----|--------------|--------------|--------------|
| Al | 11.911669092 | 12.947274944 | 8.486473003  |
| Al | 16.137878551 | 15.222600981 | 7.235408199  |
| O  | 9.127593009  | 15.249894936 | 11.198681202 |
| O  | 13.234383945 | 12.977399080 | 9.917652322  |
| O  | 9.122717058  | 14.861064416 | 8.394672827  |
| O  | 13.321802911 | 13.154625110 | 7.275941525  |
| Al | 14.756092937 | 9.068517071  | 8.806130240  |
| Al | 14.754130866 | 8.937404108  | 11.624712439 |
| Al | 14.641913619 | 14.020750719 | 9.955759469  |
| O  | 14.495191586 | 15.080011287 | 11.423477237 |
| O  | 14.720650945 | 15.167302935 | 8.568412892  |
| Al | 10.520325570 | 15.095598079 | 9.869300417  |
| Al | 10.495407797 | 14.969004595 | 7.055234878  |
| Al | 10.448349292 | 10.112277479 | 8.648317855  |
| O  | 10.524391974 | 8.961408025  | 7.265986352  |
| O  | 10.460010377 | 9.022291153  | 10.076653471 |
| Al | 10.538030478 | 12.079476964 | 11.363634116 |
| O  | 10.506413777 | 13.168049262 | 9.911595072  |
| O  | 10.504659767 | 13.069322031 | 7.283493994  |
| Al | 14.622766215 | 11.984870047 | 7.312163921  |
| O  | 14.712233725 | 10.980468388 | 8.815433079  |
| O  | 14.719602307 | 11.123596570 | 11.414665811 |
| H  | 9.955354704  | 9.257959472  | 6.535142826  |
| H  | 12.648845397 | 9.456328577  | 7.570009012  |
| H  | 15.953091674 | 9.607813748  | 6.809135681  |
| H  | 14.725259632 | 14.454503215 | 5.344509858  |
| H  | 11.957163552 | 14.230758231 | 5.390034027  |
| H  | 9.047412998  | 15.583995454 | 5.114680439  |
| H  | 14.237366571 | 10.323742763 | 5.785346952  |
| H  | 16.665286998 | 12.828838768 | 6.399225578  |
| O  | 14.719322030 | 15.166737043 | 6.000318068  |
| O  | 11.919826328 | 15.083439888 | 5.856918479  |
| O  | 9.051303849  | 14.939942340 | 5.838151332  |
| O  | 14.952376199 | 10.970855412 | 5.918120144  |
| O  | 7.699148426  | 9.195820705  | 12.713763135 |
| H  | 7.762041750  | 8.498041846  | 13.387123894 |
| H  | 14.653374775 | 11.740706461 | 12.159896601 |
| O  | 13.327829614 | 9.032714101  | 12.785635700 |
| O  | 10.515095638 | 9.029894076  | 12.734234249 |
| O  | -0.626585246 | 9.030734352  | 12.794004517 |
| H  | -0.585363700 | 9.783555676  | 13.401762670 |
| O  | 2.415760694  | 13.233974625 | 12.649473286 |
| O  | 10.587367836 | 13.312941697 | 12.649667098 |
| H  | 7.486820735  | 14.962636944 | 11.323254782 |
| H  | 13.499224992 | 14.999291009 | 11.543340722 |
| H  | 3.346885432  | 14.593423679 | 11.774504403 |
| H  | 11.527825676 | 14.706654133 | 12.035813937 |
| O  | 1.873536999  | 5.003049897  | 12.791928971 |
| H  | 7.557093582  | 6.948164995  | 11.454134990 |
| H  | 4.143907357  | 6.555781035  | 11.085946718 |
| H  | 15.965830585 | 6.950584364  | 11.500329222 |
| O  | 7.701998383  | 0.968087559  | 12.638125362 |
| H  | 7.782238260  | 0.325578916  | 13.355839834 |
| O  | -0.697718698 | 0.887168498  | 12.713160350 |
| H  | -0.617105533 | 0.112045374  | 13.289160443 |
| H  | 6.341259306  | 3.459313706  | 12.076985761 |
| O  | 4.901513887  | 0.817227520  | 12.641344798 |
| O  | 2.098041757  | 0.882223701  | 12.563698027 |
| H  | 14.799037619 | 3.587835016  | 12.129941187 |
| O  | 13.259432692 | 0.893253045  | 12.787460452 |
| O  | 10.440089786 | 0.963792129  | 12.641412061 |

|   |              |              |              |
|---|--------------|--------------|--------------|
| O | 2.171582290  | 9.113876404  | 12.641101608 |
| O | 4.913765013  | 8.942959478  | 12.698908807 |
| H | 2.170271248  | 8.324376451  | 13.203735472 |
| H | 4.859597789  | 9.672282019  | 13.333979597 |
| H | 13.189382404 | 8.220978371  | 13.315800447 |
| H | 10.549374627 | 9.669380099  | 13.462924181 |
| H | 13.245735190 | 1.633668973  | 13.411667255 |
| H | 10.384664567 | 1.716735246  | 13.249432632 |
| H | 2.093774926  | 1.624047305  | 13.188669008 |
| H | 4.808050285  | -0.009337136 | 13.138811952 |
| H | 9.449731778  | 14.745765082 | 11.981094389 |
| H | 10.664409785 | 13.055798291 | 13.578225593 |
| H | 1.716044702  | 13.909939741 | 12.690368021 |
| H | 0.063751160  | 14.625125145 | 10.933423858 |
| H | 1.071488562  | 6.577021899  | 12.006892955 |
| H | 2.696131461  | 5.434489261  | 13.071208297 |
| H | 6.300605517  | 11.676419576 | 12.040498209 |
| W | 10.549419256 | 6.672356089  | 12.941313037 |
| O | 10.582394219 | 4.925285879  | 12.718785600 |
| O | 9.202342536  | 7.256871545  | 11.452715674 |
| H | 12.049383469 | 7.132299551  | 13.553989640 |
| C | 8.824654606  | 6.980814750  | 14.263325386 |
| H | 8.788620934  | 8.024109276  | 14.618572518 |
| C | 10.837559104 | 6.347191508  | 15.126822601 |
| C | 9.326590135  | 6.138803535  | 15.450562511 |
| C | 11.846651846 | 5.239454737  | 15.514489564 |
| H | 11.452502307 | 4.293277948  | 15.106129214 |
| C | 11.943995318 | 5.092877329  | 17.043774475 |
| H | 10.974688291 | 4.858329275  | 17.500198264 |
| H | 12.645331612 | 4.288808144  | 17.314734762 |
| H | 12.311770641 | 6.025051274  | 17.499975028 |
| C | 13.260183388 | 5.423019440  | 14.937249530 |
| H | 13.937325347 | 4.651344449  | 15.334953108 |
| H | 13.278350772 | 5.361339766  | 13.841386742 |
| H | 13.683576965 | 6.400278151  | 15.219405582 |
| C | 8.879703365  | 6.731532939  | 16.799833310 |
| H | 7.780114343  | 6.758604576  | 16.859845605 |
| H | 9.249998160  | 6.148744176  | 17.655404175 |
| H | 9.249533546  | 7.761954445  | 16.910576000 |
| C | 8.829548673  | 4.688019097  | 15.361424094 |
| H | 9.267632476  | 4.062165925  | 16.152044080 |
| H | 7.737356885  | 4.667174547  | 15.493518534 |
| H | 9.055205492  | 4.222981252  | 14.393822348 |
| H | 7.845933459  | 6.681576333  | 13.847806207 |
| H | 11.151812450 | 7.288272323  | 15.612926376 |

**isobutene (2,1) insertion (side path) into species 1. E: -2356.877822881**

|    |             |             |              |
|----|-------------|-------------|--------------|
| Al | 0.723611711 | 4.902410313 | 8.588644254  |
| Al | 4.873261701 | 6.970268180 | 7.169174206  |
| O  | 3.414718421 | 7.190760349 | 11.200068272 |
| O  | 7.698698609 | 4.858533053 | 9.760391557  |
| O  | 3.401701617 | 6.848569192 | 8.422590747  |
| O  | 7.775395729 | 5.005628166 | 7.117530347  |
| Al | 4.786189281 | 3.073131629 | 10.031301808 |
| Al | 0.664073393 | 0.966738459 | 11.342261186 |
| O  | 7.629811661 | 0.808369509 | 7.279922611  |
| O  | 3.511283684 | 3.062404180 | 8.644191133  |
| O  | 7.572670359 | 1.127643619 | 10.081328916 |
| O  | 3.509159240 | 2.885514173 | 11.349348956 |
| Al | 7.771003554 | 3.026784859 | 9.938764065  |
| Al | 3.511835537 | 0.975166633 | 11.336321410 |

|    |              |             |              |
|----|--------------|-------------|--------------|
| O  | 4.992964158  | 0.729480695 | 7.213171112  |
| O  | 0.618637768  | 3.070428924 | 8.640501654  |
| O  | 4.996213650  | 1.133210707 | 10.084626246 |
| O  | 0.688879702  | 2.841329471 | 11.284674574 |
| Al | 3.493050008  | 4.897015710 | 8.466347919  |
| Al | 7.738842981  | 7.116545993 | 7.191184133  |
| O  | 0.766546044  | 7.189488190 | 11.287072094 |
| O  | 4.841879446  | 4.934575020 | 9.926718529  |
| O  | 0.774547010  | 6.850728325 | 8.472457678  |
| O  | 4.913484966  | 5.081198798 | 7.266348233  |
| Al | 6.240792547  | 0.944600002 | 8.614037124  |
| Al | 6.286661642  | 0.833425483 | 11.439294816 |
| Al | 6.308464703  | 5.931976453 | 9.888456144  |
| O  | 6.546197263  | 7.082608251 | 11.274028703 |
| O  | 6.320702789  | 7.091692911 | 8.491731211  |
| Al | 2.075418905  | 7.017529162 | 9.902953203  |
| Al | 2.095623263  | 6.871808953 | 7.069558375  |
| Al | 2.047495265  | 2.053285324 | 8.573345493  |
| O  | 2.186800919  | 0.955088788 | 7.126815175  |
| O  | 2.102723559  | 0.876768332 | 9.928733331  |
| Al | 2.074871729  | 3.951972114 | 11.383132832 |
| O  | 2.097477815  | 5.088808287 | 9.917723104  |
| O  | 2.039002252  | 5.008872466 | 7.284017891  |
| Al | 6.222653282  | 3.923081627 | 7.191274521  |
| O  | 6.256169662  | 2.854235920 | 8.653650028  |
| O  | 6.300189386  | 2.914500278 | 11.274251554 |
| H  | 1.920901932  | 1.381142914 | 6.297270591  |
| H  | 4.109687633  | 1.141818700 | 7.280683506  |
| H  | 7.337121052  | 1.402205054 | 6.543229732  |
| H  | 6.272872854  | 7.685485453 | 5.306375579  |
| H  | 3.563982066  | 6.204437550 | 5.309835612  |
| H  | 0.609491309  | 7.586199838 | 5.194301477  |
| H  | 5.885537028  | 2.435127629 | 5.406079896  |
| H  | 8.272783510  | 4.719266112 | 6.325854926  |
| O  | 6.322283223  | 6.941969730 | 5.926230120  |
| O  | 3.502122796  | 7.017862809 | 5.838551986  |
| O  | 0.625406416  | 6.946879255 | 5.919281642  |
| O  | 6.607616440  | 2.976205670 | 5.763740022  |
| Al | 9.152476992  | 4.913482297 | 8.567832872  |
| Al | 13.291361020 | 7.051859181 | 7.311404481  |
| O  | 11.669323343 | 7.257704658 | 11.366431107 |
| O  | 16.116774554 | 4.908505274 | 9.837178502  |
| O  | 11.782022810 | 6.930883943 | 8.555123850  |
| O  | 16.116113552 | 5.060023350 | 7.191375165  |
| Al | 13.204107894 | 3.097538335 | 10.112162721 |
| Al | 9.073495847  | 1.032852302 | 11.340597398 |
| O  | 15.977510645 | 0.890052581 | 7.433065559  |
| O  | 11.925186862 | 3.124871873 | 8.737446249  |
| O  | 15.951358519 | 1.130451004 | 10.170965495 |
| O  | 11.916487456 | 2.894148233 | 11.428643347 |
| Al | 16.187888067 | 3.057577315 | 10.028428941 |
| Al | 11.895351587 | 1.017260252 | 11.446739368 |
| O  | 13.249332029 | 0.792049748 | 7.508107756  |
| O  | 9.114015136  | 3.064010819 | 8.639058521  |
| O  | 13.395849222 | 1.150768447 | 10.235882945 |
| O  | 9.053274375  | 2.903701395 | 11.284881186 |
| Al | 11.919625917 | 4.965139453 | 8.572717021  |
| Al | 16.150576126 | 7.132906426 | 7.296839913  |
| O  | 13.241059676 | 4.929084554 | 9.999079221  |
| O  | 9.126441961  | 6.862582509 | 8.480743660  |
| O  | 13.316501135 | 5.166519480 | 7.358162419  |

|    |              |              |              |
|----|--------------|--------------|--------------|
| Al | 14.637569840 | 0.978220359  | 8.758666106  |
| Al | 14.692471233 | 0.879447397  | 11.574820098 |
| Al | 14.676716800 | 5.944766622  | 10.029724436 |
| O  | 14.957990667 | 7.025965316  | 11.443448469 |
| O  | 14.736326799 | 7.116362935  | 8.638002393  |
| Al | 10.457228772 | 7.090130114  | 9.966543697  |
| Al | 10.532324946 | 6.953697906  | 7.140735737  |
| Al | 10.562724723 | 2.019655117  | 8.560488782  |
| O  | 10.345700532 | 0.876023387  | 7.191054456  |
| O  | 10.514872273 | 0.884589776  | 10.008691037 |
| Al | 10.492669595 | 3.914728437  | 11.290307278 |
| O  | 10.449331160 | 5.156810752  | 9.983532575  |
| O  | 10.514926364 | 5.086770861  | 7.346511637  |
| Al | 14.578139787 | 3.973524411  | 7.344127937  |
| O  | 14.651689636 | 2.898583114  | 8.791864923  |
| O  | 14.723629064 | 2.982599224  | 11.373603393 |
| H  | 9.364390024  | 0.992326188  | 7.072593057  |
| H  | 13.377886746 | 1.362197211  | 6.725811882  |
| H  | 15.713655488 | 1.432535798  | 6.659327186  |
| H  | 14.641183632 | 7.783771313  | 5.470318902  |
| H  | 12.085078755 | 6.232161097  | 5.482656155  |
| H  | 9.083979580  | 6.666021275  | 5.097308592  |
| H  | 14.361767396 | 3.114245620  | 5.119948640  |
| H  | 16.601817502 | 4.891651258  | 6.357110186  |
| O  | 14.726077974 | 7.026046692  | 6.067999440  |
| O  | 11.974991491 | 7.084703388  | 5.938261343  |
| O  | 9.114699702  | 7.174349932  | 5.918732490  |
| O  | 14.646723541 | 2.832273487  | 5.999981011  |
| Al | 0.733940554  | 12.990251754 | 8.557378865  |
| Al | 4.869503897  | 14.989779971 | 7.069819758  |
| O  | 3.505440664  | 15.252367300 | 11.052870125 |
| O  | 7.694379500  | 12.981534235 | 9.755092995  |
| O  | 3.407737426  | 14.868693024 | 8.322086242  |
| O  | 7.724908684  | 12.996902520 | 7.048948313  |
| Al | 4.791451713  | 11.113921552 | 9.956799782  |
| Al | 0.723722947  | 9.149283021  | 11.449308137 |
| O  | 7.637382965  | 8.942086088  | 7.364302984  |
| O  | 3.501507567  | 11.050641424 | 8.560977891  |
| O  | 7.626783188  | 9.276735929  | 10.151928402 |
| O  | 3.521408819  | 10.927445155 | 11.264064055 |
| Al | 7.783547875  | 11.172081506 | 10.005195981 |
| Al | 3.541581258  | 9.064514603  | 11.345655413 |
| O  | 4.992989383  | 8.864406561  | 7.283650685  |
| O  | 0.616828288  | 11.174630906 | 8.712254896  |
| O  | 5.052337887  | 9.194153174  | 10.099491685 |
| O  | 0.712354340  | 11.044463863 | 11.372570635 |
| Al | 3.493982698  | 12.911078256 | 8.367879648  |
| Al | 7.700959397  | 15.088886966 | 7.136365939  |
| O  | 0.794723786  | 15.238862030 | 11.129369808 |
| O  | 4.825191957  | 12.918074550 | 9.766307219  |
| O  | 0.776426993  | 14.922299290 | 8.381919549  |
| O  | 4.897839161  | 13.079246951 | 7.120847117  |
| Al | 6.305764719  | 9.041183530  | 8.663417594  |
| Al | 6.330912338  | 8.998702025  | 11.482474136 |
| Al | 6.217726558  | 13.972491134 | 9.852799821  |
| O  | 6.480459470  | 15.028278705 | 11.283628013 |
| O  | 6.301683515  | 15.109607036 | 8.441267160  |
| Al | 2.162270845  | 15.087223843 | 9.809580374  |
| Al | 2.094175970  | 14.918529087 | 6.983400645  |
| Al | 1.994445065  | 10.094365749 | 8.600992881  |
| O  | 2.111191074  | 8.952869309  | 7.192939988  |

|    |              |              |              |
|----|--------------|--------------|--------------|
| O  | 2.044908167  | 8.950924168  | 10.003490356 |
| Al | 2.172757851  | 12.078857099 | 11.354734828 |
| O  | 2.105682551  | 13.155510703 | 9.836255865  |
| O  | 2.023971494  | 13.059296659 | 7.206255897  |
| Al | 6.203950939  | 11.918696173 | 7.172109649  |
| O  | 6.275511562  | 10.929921037 | 8.679288579  |
| O  | 6.300834208  | 11.063507287 | 11.278919811 |
| H  | 2.272060742  | 9.372943558  | 6.333260446  |
| H  | 4.154549190  | 9.308703850  | 7.510010539  |
| H  | 7.411995512  | 9.559061507  | 6.626057159  |
| H  | 6.348371895  | 14.263314614 | 5.249411656  |
| H  | 3.514928854  | 14.172981684 | 5.262670497  |
| H  | 0.570110632  | 15.656428168 | 5.078215161  |
| H  | 5.731705042  | 10.256111986 | 5.682124408  |
| H  | 8.288621450  | 12.774372486 | 6.279045019  |
| O  | 6.317757454  | 15.020895123 | 5.850787065  |
| O  | 3.492296792  | 15.011976500 | 5.752871648  |
| O  | 0.618638579  | 15.084093340 | 5.854651053  |
| O  | 6.465105355  | 10.892643910 | 5.764238931  |
| Al | 9.140431999  | 12.969044964 | 8.537750274  |
| Al | 13.255878692 | 15.073151702 | 7.221174532  |
| O  | 11.839562746 | 15.260089063 | 11.276295946 |
| O  | 16.133940766 | 13.067704578 | 9.903602749  |
| O  | 11.776524327 | 14.918967637 | 8.468750022  |
| O  | 16.129591326 | 13.078624983 | 7.183373623  |
| Al | 13.225048880 | 11.157284462 | 10.114103392 |
| Al | 9.075578184  | 9.191674972  | 11.409915310 |
| O  | 16.116239287 | 8.948320995  | 7.520667181  |
| O  | 11.939091068 | 11.074847561 | 8.712806062  |
| O  | 16.025222114 | 9.275343097  | 10.253358006 |
| O  | 11.924167681 | 10.967085790 | 11.423113812 |
| Al | 16.207851437 | 11.203261901 | 10.118118699 |
| Al | 11.967889519 | 9.088451032  | 11.432414879 |
| O  | 13.461749095 | 8.933168344  | 7.436691155  |
| O  | 9.044157883  | 11.143333963 | 8.642025252  |
| O  | 13.468862212 | 9.213401547  | 10.247943482 |
| O  | 9.104270669  | 11.050899097 | 11.351374771 |
| Al | 11.911826169 | 12.947405335 | 8.487108891  |
| Al | 16.137785433 | 15.222795099 | 7.235490516  |
| O  | 9.127610485  | 15.249924844 | 11.198610875 |
| O  | 13.234461729 | 12.976657787 | 9.917928809  |
| O  | 9.123211067  | 14.862164955 | 8.394572403  |
| O  | 13.321866671 | 13.154628621 | 7.276043470  |
| Al | 14.755521825 | 9.068070756  | 8.807207002  |
| Al | 14.752734483 | 8.939090138  | 11.625547210 |
| Al | 14.641666789 | 14.020237156 | 9.955637824  |
| O  | 14.495063165 | 15.079854879 | 11.423065634 |
| O  | 14.720636780 | 15.167409153 | 8.568604102  |
| Al | 10.520737953 | 15.095992704 | 9.870185283  |
| Al | 10.496141560 | 14.971356340 | 7.056419639  |
| Al | 10.449205153 | 10.112942958 | 8.647561701  |
| O  | 10.525329705 | 8.960183503  | 7.267501996  |
| O  | 10.457032403 | 9.024086697  | 10.075976012 |
| Al | 10.539143121 | 12.079803087 | 11.365664355 |
| O  | 10.506961707 | 13.168180598 | 9.911816239  |
| O  | 10.505239091 | 13.070091229 | 7.283276337  |
| Al | 14.622630194 | 11.984856064 | 7.313143788  |
| O  | 14.712363381 | 10.979987934 | 8.815888662  |
| O  | 14.719460710 | 11.122884435 | 11.416783117 |
| H  | 9.965397705  | 9.256147642  | 6.529732516  |
| H  | 12.647950973 | 9.453207390  | 7.570069057  |

|   |              |              |              |
|---|--------------|--------------|--------------|
| H | 15.946395637 | 9.606838687  | 6.808718193  |
| H | 14.724991067 | 14.453999152 | 5.344895402  |
| H | 11.955915013 | 14.230284149 | 5.391746038  |
| H | 9.050400976  | 15.586950150 | 5.115212817  |
| H | 14.234724885 | 10.327384297 | 5.782183819  |
| H | 16.665024860 | 12.829810130 | 6.399089908  |
| O | 14.719368605 | 15.166487797 | 6.000406954  |
| O | 11.919962858 | 15.083735629 | 5.857339692  |
| O | 9.052949149  | 14.941912711 | 5.837846121  |
| O | 14.952462787 | 10.970685385 | 5.918404059  |
| O | 7.704644263  | 9.191122141  | 12.716176358 |
| H | 7.794685176  | 8.439982411  | 13.330560786 |
| H | 14.652827104 | 11.739986627 | 12.162024628 |
| O | 13.325286244 | 9.028195030  | 12.788786983 |
| O | 10.502677858 | 9.026087022  | 12.726265181 |
| O | -0.627039570 | 9.030781375  | 12.794194542 |
| H | -0.585194175 | 9.779182549  | 13.407252965 |
| O | 2.416158671  | 13.233574045 | 12.649115724 |
| O | 10.587614694 | 13.313145235 | 12.650485288 |
| H | 7.486309701  | 14.962873169 | 11.322899582 |
| H | 13.499016239 | 14.998962041 | 11.543239878 |
| H | 3.346868700  | 14.593977905 | 11.774744636 |
| H | 11.527942567 | 14.706590092 | 12.036327938 |
| O | 1.874053488  | 5.002858484  | 12.792154833 |
| H | 7.544608037  | 6.989494969  | 11.442071361 |
| H | 4.140626330  | 6.551992179  | 11.095330596 |
| H | 15.966314107 | 6.952071254  | 11.501175399 |
| O | 7.701662544  | 0.965823308  | 12.636883325 |
| H | 7.782213188  | 0.322754577  | 13.354044850 |
| O | -0.697635133 | 0.887070795  | 12.712971586 |
| H | -0.616194339 | 0.113392991  | 13.290802405 |
| H | 6.345077170  | 3.471849462  | 12.068292236 |
| O | 4.901992691  | 0.817675558  | 12.641472523 |
| O | 2.098291366  | 0.882489125  | 12.563616607 |
| H | 14.800844546 | 3.591443992  | 12.125964367 |
| O | 13.259931709 | 0.892042014  | 12.787428512 |
| O | 10.439599120 | 0.962557822  | 12.641832925 |
| O | 2.174498139  | 9.114462056  | 12.638120902 |
| O | 4.912249469  | 8.950836090  | 12.645999010 |
| H | 2.181048404  | 8.318167698  | 13.191305240 |
| H | 4.846122816  | 9.662606294  | 13.299588972 |
| H | 13.186764609 | 8.204925915  | 13.302092709 |
| H | 10.528964746 | 9.629239559  | 13.485917970 |
| H | 13.247673189 | 1.630834961  | 13.413129223 |
| H | 10.381377634 | 1.705465198  | 13.261308291 |
| H | 2.093867284  | 1.623729244  | 13.189298564 |
| H | 4.808397845  | -0.008402238 | 13.139701065 |
| H | 9.449277478  | 14.745503313 | 11.981053698 |
| H | 10.662262796 | 13.052428710 | 13.578402935 |
| H | 1.715522567  | 13.908469460 | 12.690940798 |
| H | 0.063601196  | 14.625671610 | 10.933687686 |
| H | 1.077316379  | 6.580253754  | 12.007273883 |
| H | 2.699721705  | 5.406301678  | 13.102315085 |
| H | 6.289313111  | 11.668389840 | 12.037297860 |
| W | 10.485109236 | 6.677969612  | 12.939268921 |
| O | 10.599115361 | 4.921080684  | 12.811131094 |
| O | 9.198208292  | 7.262063377  | 11.452425043 |
| H | 12.021516469 | 7.084721041  | 13.519873728 |
| C | 8.601796948  | 6.453755832  | 14.201261158 |
| H | 8.069787623  | 7.396621567  | 14.417660514 |
| C | 10.678550012 | 6.978018298  | 15.162825245 |

|   |              |             |              |
|---|--------------|-------------|--------------|
| C | 9.422781074  | 6.163397023 | 15.462691343 |
| H | 9.694234248  | 5.100165948 | 15.508386991 |
| C | 11.938374127 | 6.365918068 | 15.782988460 |
| H | 11.815795503 | 6.284577799 | 16.878992801 |
| H | 12.132812716 | 5.355488965 | 15.395673301 |
| H | 12.835635308 | 6.972862068 | 15.590317690 |
| C | 10.529683586 | 8.422615305 | 15.637309809 |
| H | 9.601948930  | 8.894833247 | 15.280727705 |
| H | 10.492227544 | 8.445664594 | 16.741584306 |
| H | 11.388645845 | 9.043461580 | 15.333889971 |
| H | 8.932640708  | 6.406175794 | 16.429010007 |
| C | 7.539806412  | 5.390834185 | 13.787651714 |
| H | 7.548759072  | 5.302713466 | 12.688615555 |
| C | 6.124024151  | 5.818658397 | 14.211391352 |
| H | 5.375103565  | 5.066721215 | 13.910086640 |
| H | 6.066737138  | 5.917276065 | 15.306764898 |
| H | 5.830043180  | 6.773022114 | 13.757395724 |
| C | 7.829727754  | 3.991346639 | 14.347599430 |
| H | 7.107282705  | 3.253778385 | 13.970646747 |
| H | 8.823211355  | 3.628693299 | 14.058243348 |
| H | 7.757074028  | 3.981652090 | 15.444834043 |

**2-butene insertion (top path) into species 1. E: -2356.8808140445**

|    |             |             |              |
|----|-------------|-------------|--------------|
| Al | 0.723543647 | 4.902358542 | 8.588788816  |
| Al | 4.873282457 | 6.970205240 | 7.169115744  |
| O  | 3.414832739 | 7.190520705 | 11.199978073 |
| O  | 7.698955696 | 4.857833108 | 9.760206749  |
| O  | 3.401553562 | 6.848619582 | 8.422562149  |
| O  | 7.775507194 | 5.005620209 | 7.117627986  |
| Al | 4.786132896 | 3.072617717 | 10.030794215 |
| Al | 0.664069787 | 0.966736946 | 11.342210857 |
| O  | 7.629821119 | 0.808358550 | 7.279780859  |
| O  | 3.511230052 | 3.062335954 | 8.644007230  |
| O  | 7.572471263 | 1.127760064 | 10.081250610 |
| O  | 3.509295939 | 2.885487486 | 11.349379190 |
| Al | 7.771302416 | 3.026403745 | 9.938700225  |
| Al | 3.511735533 | 0.975085300 | 11.336367905 |
| O  | 4.992861696 | 0.729409786 | 7.213049082  |
| O  | 0.618600005 | 3.070349804 | 8.640467703  |
| O  | 4.996018632 | 1.132959020 | 10.084364997 |
| O  | 0.688980918 | 2.841186434 | 11.284558657 |
| Al | 3.492942374 | 4.896981778 | 8.466409808  |
| Al | 7.738828405 | 7.116485298 | 7.191238633  |
| O  | 0.766695579 | 7.189427520 | 11.287183397 |
| O  | 4.841775148 | 4.934105080 | 9.926687635  |
| O  | 0.774455371 | 6.850543908 | 8.472370356  |
| O  | 4.913486058 | 5.081200934 | 7.266364741  |
| Al | 6.240708946 | 0.944584235 | 8.613531970  |
| Al | 6.286164568 | 0.833157439 | 11.438667680 |
| Al | 6.308640134 | 5.930741368 | 9.888705979  |
| O  | 6.547143759 | 7.077793360 | 11.276479992 |
| O  | 6.320723825 | 7.091468986 | 8.492213501  |
| Al | 2.075493233 | 7.017448995 | 9.903025532  |
| Al | 2.095740190 | 6.871843306 | 7.069417518  |
| Al | 2.047480736 | 2.053227033 | 8.573317082  |
| O  | 2.186851565 | 0.955056934 | 7.126814061  |
| O  | 2.102717620 | 0.876713526 | 9.928737632  |
| Al | 2.074918089 | 3.951937533 | 11.383273867 |
| O  | 2.097393030 | 5.088684759 | 9.917779844  |
| O  | 2.038997692 | 5.008779822 | 7.284165829  |
| Al | 6.222695384 | 3.923070882 | 7.191215426  |



|    |              |             |              |
|----|--------------|-------------|--------------|
| O  | 6.256064393  | 2.854012511 | 8.653493202  |
| O  | 6.299892408  | 2.913957550 | 11.274719032 |
| H  | 1.921040666  | 1.381158840 | 6.297266041  |
| H  | 4.109535272  | 1.141693356 | 7.280436208  |
| H  | 7.337224201  | 1.402300378 | 6.543107991  |
| H  | 6.272591403  | 7.685570241 | 5.306613276  |
| H  | 3.564144398  | 6.203882619 | 5.310493358  |
| H  | 0.608188979  | 7.581355198 | 5.190499700  |
| H  | 5.885464126  | 2.435397537 | 5.405863083  |
| H  | 8.272927466  | 4.719274169 | 6.325959919  |
| O  | 6.322282107  | 6.941891729 | 5.926246314  |
| O  | 3.502070988  | 7.017775056 | 5.838505681  |
| O  | 0.625345842  | 6.946661750 | 5.919386129  |
| O  | 6.607627739  | 2.976249402 | 5.763687006  |
| Al | 9.152764619  | 4.913178895 | 8.568065496  |
| Al | 13.291518153 | 7.051706168 | 7.311398782  |
| O  | 11.664422993 | 7.257498361 | 11.369470010 |
| O  | 16.116940659 | 4.908493148 | 9.837537975  |
| O  | 11.782246698 | 6.930930527 | 8.555067256  |
| O  | 16.116091429 | 5.059914060 | 7.191359437  |
| Al | 13.204115940 | 3.097474517 | 10.112240137 |
| Al | 9.073963756  | 1.033166444 | 11.340222169 |
| O  | 15.977526570 | 0.890095508 | 7.433105641  |
| O  | 11.925262671 | 3.124860509 | 8.737378281  |
| O  | 15.951357666 | 1.130499782 | 10.170892594 |
| O  | 11.916745467 | 2.894216777 | 11.428775810 |
| Al | 16.187916429 | 3.057559591 | 10.028435338 |
| Al | 11.895246410 | 1.017448338 | 11.447314749 |
| O  | 13.249353120 | 0.792008645 | 7.508152292  |
| O  | 9.114020717  | 3.063807250 | 8.638921151  |
| O  | 13.395918593 | 1.150774619 | 10.235981551 |
| O  | 9.053986111  | 2.903611837 | 11.284509689 |
| Al | 11.920019330 | 4.964833599 | 8.572719410  |
| Al | 16.150481945 | 7.132819740 | 7.296855075  |
| O  | 13.241017109 | 4.929089582 | 9.998966807  |
| O  | 9.126741987  | 6.862493532 | 8.480284709  |
| O  | 13.316557937 | 5.166536130 | 7.358150655  |
| Al | 14.637683114 | 0.978254175 | 8.758725313  |
| Al | 14.692448846 | 0.879979534 | 11.574968738 |
| Al | 14.676896476 | 5.944485821 | 10.030009304 |
| O  | 14.958181623 | 7.025819557 | 11.443265234 |
| O  | 14.736341297 | 7.116188452 | 8.638067667  |
| Al | 10.458343052 | 7.090675125 | 9.964583296  |
| Al | 10.532426195 | 6.953510571 | 7.140331396  |
| Al | 10.562801045 | 2.019697300 | 8.560549085  |
| O  | 10.345784593 | 0.876011800 | 7.191018991  |
| O  | 10.514896172 | 0.884613203 | 10.008662984 |
| Al | 10.493661223 | 3.915315196 | 11.292315484 |
| O  | 10.449156982 | 5.157005801 | 9.984505770  |
| O  | 10.515059368 | 5.086722770 | 7.346808592  |
| Al | 14.578255840 | 3.973422471 | 7.344076796  |
| O  | 14.651668135 | 2.898585374 | 8.791872791  |
| O  | 14.723585745 | 2.982518138 | 11.373590281 |
| H  | 9.364489211  | 0.992344228 | 7.072521854  |
| H  | 13.377830698 | 1.362179728 | 6.725873411  |
| H  | 15.713604007 | 1.432444957 | 6.659308894  |
| H  | 14.641428286 | 7.784508479 | 5.471070610  |
| H  | 12.085617238 | 6.232431830 | 5.482284933  |
| H  | 9.083751493  | 6.666784650 | 5.096843280  |
| H  | 14.361838707 | 3.114120937 | 5.119875292  |
| H  | 16.602228307 | 4.891528655 | 6.357349694  |

|    |              |              |              |
|----|--------------|--------------|--------------|
| O  | 14.726145372 | 7.026045891  | 6.067855537  |
| O  | 11.975264446 | 7.084711539  | 5.938308096  |
| O  | 9.114626549  | 7.174505152  | 5.918649718  |
| O  | 14.646402768 | 2.832171601  | 6.000034467  |
| Al | 0.733894729  | 12.989306850 | 8.557370414  |
| Al | 4.869497015  | 14.989620209 | 7.069656969  |
| O  | 3.505367499  | 15.252272256 | 11.052820680 |
| O  | 7.694383550  | 12.981933877 | 9.755132492  |
| O  | 3.407774223  | 14.868240765 | 8.322066599  |
| O  | 7.724942257  | 12.996837196 | 7.048921656  |
| Al | 4.791506188  | 11.113818918 | 9.957655732  |
| Al | 0.723645469  | 9.149244163  | 11.449488771 |
| O  | 7.637156391  | 8.942111631  | 7.364372106  |
| O  | 3.501740489  | 11.050614944 | 8.561088129  |
| O  | 7.626398772  | 9.276746583  | 10.152194019 |
| O  | 3.521298064  | 10.926838593 | 11.264228054 |
| Al | 7.782354506  | 11.172714626 | 10.004884073 |
| Al | 3.541845810  | 9.064066334  | 11.346541995 |
| O  | 4.993020188  | 8.864256686  | 7.283564118  |
| O  | 0.616687360  | 11.172903023 | 8.712155875  |
| O  | 5.052748574  | 9.193562864  | 10.100294655 |
| O  | 0.712350658  | 11.044435203 | 11.372556217 |
| Al | 3.494029787  | 12.910813793 | 8.367917291  |
| Al | 7.700930554  | 15.088893764 | 7.136071670  |
| O  | 0.794705018  | 15.238809608 | 11.129364149 |
| O  | 4.825219820  | 12.917977588 | 9.766233248  |
| O  | 0.776418582  | 14.922100852 | 8.381934605  |
| O  | 4.897873991  | 13.079118222 | 7.120795625  |
| Al | 6.305050637  | 9.041046779  | 8.663434957  |
| Al | 6.331168867  | 8.995898617  | 11.483675286 |
| Al | 6.217513132  | 13.972632646 | 9.852509126  |
| O  | 6.480493367  | 15.028144363 | 11.283527586 |
| O  | 6.301627648  | 15.109519237 | 8.440633345  |
| Al | 2.162081784  | 15.087044662 | 9.809456714  |
| Al | 2.094115244  | 14.918183749 | 6.983429167  |
| Al | 1.995102132  | 10.093865872 | 8.601452667  |
| O  | 2.111414066  | 8.952708803  | 7.193337151  |
| O  | 2.045361153  | 8.950625907  | 10.003698457 |
| Al | 2.172830703  | 12.078638361 | 11.354837551 |
| O  | 2.105668200  | 13.155283566 | 9.836243730  |
| O  | 2.023848761  | 13.059007191 | 7.206243796  |
| Al | 6.203947821  | 11.918512428 | 7.172243043  |
| O  | 6.275995726  | 10.929812296 | 8.679742569  |
| O  | 6.300651028  | 11.063647521 | 11.278786470 |
| H  | 2.258288576  | 9.373985464  | 6.331989801  |
| H  | 4.153766931  | 9.308899770  | 7.506324922  |
| H  | 7.410958850  | 9.558765925  | 6.626032463  |
| H  | 6.348328006  | 14.263449584 | 5.249006729  |
| H  | 3.514863316  | 14.173228229 | 5.262164401  |
| H  | 0.570088803  | 15.656493341 | 5.078373878  |
| H  | 5.731112542  | 10.257165306 | 5.680462108  |
| H  | 8.288517859  | 12.774328763 | 6.278913805  |
| O  | 6.317729426  | 15.020829655 | 5.850626646  |
| O  | 3.492209930  | 15.011923075 | 5.752855136  |
| O  | 0.618624116  | 15.084057118 | 5.854734596  |
| O  | 6.465125600  | 10.892707759 | 5.764244013  |
| Al | 9.140290101  | 12.969163326 | 8.537619589  |
| Al | 13.256003082 | 15.073046680 | 7.220998375  |
| O  | 11.839535701 | 15.260235408 | 11.276133278 |
| O  | 16.133973990 | 13.067400013 | 9.903463039  |
| O  | 11.776589010 | 14.918934827 | 8.468670337  |

|    |              |              |              |
|----|--------------|--------------|--------------|
| O  | 16.129590904 | 13.078467273 | 7.183547471  |
| Al | 13.225284970 | 11.157484503 | 10.114295640 |
| Al | 9.074741217  | 9.193547724  | 11.406422870 |
| O  | 16.116180970 | 8.948231940  | 7.520597096  |
| O  | 11.939477111 | 11.075272165 | 8.712673672  |
| O  | 16.024755072 | 9.275151622  | 10.253710223 |
| O  | 11.924468118 | 10.967016179 | 11.423260278 |
| Al | 16.207838111 | 11.202839854 | 10.118330409 |
| Al | 11.968895225 | 9.087145441  | 11.431436883 |
| O  | 13.461869014 | 8.932918838  | 7.436731641  |
| O  | 9.044139216  | 11.143410103 | 8.642167260  |
| O  | 13.468852251 | 9.212959074  | 10.248084012 |
| O  | 9.104344696  | 11.051527006 | 11.351012197 |
| Al | 11.912074348 | 12.947626120 | 8.486895935  |
| Al | 16.137828321 | 15.222776596 | 7.235693935  |
| O  | 9.127470860  | 15.249875281 | 11.198529570 |
| O  | 13.234554270 | 12.976787436 | 9.917893422  |
| O  | 9.123165035  | 14.862257543 | 8.394538423  |
| O  | 13.321894241 | 13.154599067 | 7.275907169  |
| Al | 14.755699936 | 9.067737754  | 8.807453091  |
| Al | 14.752541822 | 8.938082692  | 11.626569916 |
| Al | 14.641857130 | 14.020346089 | 9.955694353  |
| O  | 14.495118371 | 15.079853474 | 11.423112656 |
| O  | 14.720604418 | 15.167358294 | 8.568560040  |
| Al | 10.520870143 | 15.096284235 | 9.869999257  |
| Al | 10.496240101 | 14.971541106 | 7.056373401  |
| Al | 10.449549909 | 10.113599100 | 8.646842227  |
| O  | 10.525324033 | 8.960251362  | 7.267301650  |
| O  | 10.457690179 | 9.024695165  | 10.075164632 |
| Al | 10.539696320 | 12.080198997 | 11.364742536 |
| O  | 10.506932347 | 13.168446921 | 9.911630283  |
| O  | 10.505245242 | 13.070110518 | 7.283290409  |
| Al | 14.622576351 | 11.984713291 | 7.313258048  |
| O  | 14.712284492 | 10.979892168 | 8.816082884  |
| O  | 14.719269309 | 11.122715081 | 11.417269771 |
| H  | 9.964050378  | 9.255666739  | 6.530300648  |
| H  | 12.648087423 | 9.453088637  | 7.569433725  |
| H  | 15.945407429 | 9.606585214  | 6.808716678  |
| H  | 14.725149558 | 14.454134220 | 5.344743464  |
| H  | 11.955901675 | 14.230412427 | 5.391384341  |
| H  | 9.050444193  | 15.586582637 | 5.114837971  |
| H  | 14.234456046 | 10.327985770 | 5.781081989  |
| H  | 16.664850319 | 12.829785403 | 6.399098220  |
| O  | 14.719418321 | 15.166496143 | 6.000396386  |
| O  | 11.919937240 | 15.083732680 | 5.857201086  |
| O  | 9.053015297  | 14.941904583 | 5.837791564  |
| O  | 14.952453750 | 10.970714462 | 5.918384572  |
| O  | 7.705447698  | 9.193115892  | 12.715643718 |
| H  | 7.791715897  | 8.451083602  | 13.341167488 |
| H  | 14.653259601 | 11.740105786 | 12.162329434 |
| O  | 13.323796919 | 9.023391546  | 12.789361027 |
| O  | 10.505015962 | 9.028754504  | 12.726176885 |
| O  | -0.626991518 | 9.030665410  | 12.794179318 |
| H  | -0.585382641 | 9.776991773  | 13.409710655 |
| O  | 2.416195048  | 13.233502447 | 12.649049893 |
| O  | 10.587821658 | 13.313200860 | 12.650190092 |
| H  | 7.486425185  | 14.962800542 | 11.322157001 |
| H  | 13.499062477 | 14.999163914 | 11.543097080 |
| H  | 3.346609443  | 14.593915811 | 11.774695154 |
| H  | 11.527788547 | 14.706143486 | 12.035661371 |
| O  | 1.873971096  | 5.002555346  | 12.792292495 |

|   |              |              |              |
|---|--------------|--------------|--------------|
| H | 7.544033774  | 6.982007008  | 11.448179589 |
| H | 4.139421820  | 6.550181252  | 11.095596522 |
| H | 15.966501135 | 6.951778615  | 11.501347242 |
| O | 7.701400556  | 0.964593021  | 12.636654457 |
| H | 7.782983439  | 0.315940067  | 13.348839151 |
| O | -0.697560437 | 0.887158500  | 12.713018272 |
| H | -0.616342827 | 0.112937379  | 13.290154688 |
| H | 6.336449758  | 3.474497851  | 12.066983050 |
| O | 4.901994733  | 0.817386667  | 12.641417075 |
| O | 2.098317523  | 0.882541127  | 12.563595986 |
| H | 14.799582580 | 3.591289870  | 12.126164466 |
| O | 13.259869363 | 0.892104984  | 12.787584141 |
| O | 10.439411372 | 0.962507453  | 12.641733799 |
| O | 2.174464612  | 9.114299690  | 12.638264184 |
| O | 4.912646746  | 8.949474034  | 12.646388540 |
| H | 2.180284852  | 8.317875250  | 13.191309291 |
| H | 4.847531051  | 9.657884833  | 13.303523850 |
| H | 13.188258585 | 8.197766583  | 13.299406862 |
| H | 10.533302107 | 9.641156319  | 13.477868510 |
| H | 13.246995702 | 1.631514502  | 13.412627940 |
| H | 10.378156963 | 1.704238043  | 13.262490834 |
| H | 2.093691869  | 1.623763860  | 13.189292754 |
| H | 4.808233604  | -0.008782407 | 13.139459467 |
| H | 9.449468346  | 14.746129483 | 11.981183095 |
| H | 10.670642475 | 13.054505762 | 13.577894742 |
| H | 1.715364298  | 13.908171705 | 12.691096008 |
| H | 0.063635207  | 14.625552642 | 10.933752183 |
| H | 1.078560512  | 6.580939215  | 12.007599252 |
| H | 2.700596835  | 5.398138586  | 13.109689867 |
| H | 6.288684754  | 11.668523873 | 12.037146426 |
| W | 10.465736776 | 6.678053691  | 12.936818619 |
| O | 10.599371790 | 4.922211748  | 12.814379454 |
| O | 9.196740441  | 7.264397155  | 11.446503772 |
| H | 12.023425357 | 6.994620733  | 13.542346049 |
| C | 8.570376276  | 6.381085063  | 14.161658750 |
| H | 7.972447331  | 7.298752036  | 14.317113279 |
| C | 10.508575666 | 7.186972067  | 15.095882136 |
| C | 9.374175126  | 6.235660565  | 15.462125106 |
| H | 9.792305276  | 5.216601069  | 15.521785346 |
| C | 11.776025533 | 7.108241579  | 15.938957312 |
| H | 11.554583202 | 7.263304268  | 17.009090380 |
| H | 12.257320510 | 6.124190848  | 15.839934946 |
| H | 12.515805561 | 7.866655975  | 15.643197340 |
| C | 7.589350074  | 5.242913040  | 13.761767257 |
| H | 7.643564146  | 5.119900560  | 12.665601583 |
| C | 6.131538519  | 5.589550277  | 14.118274012 |
| H | 5.439662035  | 4.791852834  | 13.796209611 |
| H | 6.016334035  | 5.698282770  | 15.207281798 |
| H | 5.808200198  | 6.521772007  | 13.638573922 |
| C | 7.956766567  | 3.888611992  | 14.384101134 |
| H | 7.318647802  | 3.084489188  | 13.994951550 |
| H | 8.991976701  | 3.605117520  | 14.158512328 |
| H | 7.834955958  | 3.911863442  | 15.476856940 |
| H | 10.093224093 | 8.211930808  | 15.147678058 |
| C | 8.639780218  | 6.531988385  | 16.776864619 |
| H | 7.829703114  | 5.811323313  | 16.961663118 |
| H | 9.323740209  | 6.495653286  | 17.638605312 |
| H | 8.191447347  | 7.537277474  | 16.740284990 |

**1-butene (1,2) insertion (side path) into 2c species. E: -2343.1091575013**

|    |             |             |             |
|----|-------------|-------------|-------------|
| Al | 0.723189332 | 4.903142600 | 8.589495507 |
|----|-------------|-------------|-------------|

|    |              |             |              |
|----|--------------|-------------|--------------|
| Al | 4.871327127  | 6.973618644 | 7.185581742  |
| O  | 3.415567753  | 7.189831561 | 11.204093980 |
| O  | 7.705673671  | 4.851536252 | 9.755378382  |
| O  | 3.396731160  | 6.844921018 | 8.433411515  |
| O  | 7.772500884  | 5.004941638 | 7.114083667  |
| Al | 4.783844194  | 3.070207666 | 10.030249899 |
| Al | 0.663700601  | 0.966456645 | 11.342037611 |
| O  | 7.629620003  | 0.807723876 | 7.279949024  |
| O  | 3.510395052  | 3.061340989 | 8.643428666  |
| O  | 7.571757787  | 1.126786059 | 10.080479840 |
| O  | 3.508272417  | 2.884062125 | 11.348880913 |
| Al | 7.772798078  | 3.024629633 | 9.934545537  |
| Al | 3.511225621  | 0.974465367 | 11.336566633 |
| O  | 4.992900506  | 0.728655887 | 7.213156130  |
| O  | 0.618364835  | 3.070496815 | 8.640594614  |
| O  | 4.995675430  | 1.132660904 | 10.084539206 |
| O  | 0.688295409  | 2.840647079 | 11.284918502 |
| Al | 3.490289752  | 4.895545983 | 8.468758929  |
| Al | 7.738708692  | 7.118910924 | 7.192535587  |
| O  | 0.765928330  | 7.189272579 | 11.287238745 |
| O  | 4.839588178  | 4.929967510 | 9.925791202  |
| O  | 0.773875589  | 6.850937313 | 8.473168553  |
| O  | 4.912231969  | 5.082443916 | 7.268493094  |
| Al | 6.240197396  | 0.942485019 | 8.614266421  |
| Al | 6.286453793  | 0.834072127 | 11.439566130 |
| Al | 6.312998411  | 5.913150370 | 9.888929362  |
| O  | 6.551228285  | 7.026158913 | 11.293885582 |
| O  | 6.326838301  | 7.085497416 | 8.502900580  |
| Al | 2.076044002  | 7.019954491 | 9.904889350  |
| Al | 2.094397410  | 6.872564881 | 7.072318737  |
| Al | 2.046462396  | 2.052638801 | 8.572940621  |
| O  | 2.186890397  | 0.954537513 | 7.126784776  |
| O  | 2.102463134  | 0.876316674 | 9.928616924  |
| Al | 2.073814345  | 3.951247869 | 11.382692608 |
| O  | 2.096775483  | 5.088061429 | 9.918466478  |
| O  | 2.038613898  | 5.008963152 | 7.284289786  |
| Al | 6.218628984  | 3.921587181 | 7.191298644  |
| O  | 6.254560539  | 2.851118749 | 8.652711292  |
| O  | 6.300458037  | 2.913127739 | 11.275708643 |
| H  | 1.924093471  | 1.380828899 | 6.296379532  |
| H  | 4.109170578  | 1.139973495 | 7.281586666  |
| H  | 7.336178342  | 1.400893184 | 6.543174634  |
| H  | 6.270920206  | 7.686464244 | 5.309496587  |
| H  | 3.572994744  | 6.206443829 | 5.317587010  |
| H  | 0.614493401  | 7.601216168 | 5.206924163  |
| H  | 5.885017161  | 2.434536867 | 5.404577313  |
| H  | 8.262353837  | 4.723447907 | 6.315642020  |
| O  | 6.318648403  | 6.944972272 | 5.931889799  |
| O  | 3.503831661  | 7.021109132 | 5.843421410  |
| O  | 0.625703023  | 6.947157592 | 5.918966237  |
| O  | 6.605984100  | 2.976226004 | 5.763563708  |
| Al | 9.154058011  | 4.909369242 | 8.542876150  |
| Al | 13.291934080 | 7.053517417 | 7.309950587  |
| O  | 11.675835548 | 7.256941293 | 11.369076385 |
| O  | 16.116563400 | 4.908626727 | 9.837563426  |
| O  | 11.779374879 | 6.929739812 | 8.550687274  |
| O  | 16.116388315 | 5.060258839 | 7.191209803  |
| Al | 13.202609506 | 3.101198734 | 10.110711787 |
| Al | 9.073154918  | 1.032801921 | 11.340095038 |
| O  | 15.977521734 | 0.890145653 | 7.433129656  |
| O  | 11.924640049 | 3.124816424 | 8.732423070  |

|    |              |              |              |
|----|--------------|--------------|--------------|
| O  | 15.950829512 | 1.130533048  | 10.170789439 |
| O  | 11.912777105 | 2.898924364  | 11.427550972 |
| Al | 16.187380813 | 3.057873005  | 10.028307231 |
| Al | 11.894621495 | 1.019302808  | 11.446121315 |
| O  | 13.249156060 | 0.792061706  | 7.508149585  |
| O  | 9.116191682  | 3.061697220  | 8.635419277  |
| O  | 13.395060774 | 1.154011536  | 10.236054058 |
| O  | 9.048902424  | 2.901587730  | 11.282898962 |
| Al | 11.913821151 | 4.963909468  | 8.555903404  |
| Al | 16.151038232 | 7.132874506  | 7.296328180  |
| O  | 13.239794850 | 4.929915095  | 9.997705195  |
| O  | 9.128056514  | 6.861016648  | 8.475610999  |
| O  | 13.317379433 | 5.166883606  | 7.356853094  |
| Al | 14.637465890 | 0.978959529  | 8.758575134  |
| Al | 14.692024977 | 0.881712618  | 11.574819893 |
| Al | 14.675550439 | 5.944293523  | 10.028781212 |
| O  | 14.957993350 | 7.025555553  | 11.443031488 |
| O  | 14.736040528 | 7.116885382  | 8.637695200  |
| Al | 10.449127865 | 7.088804563  | 9.961615371  |
| Al | 10.533783104 | 6.956459683  | 7.130170578  |
| Al | 10.564548773 | 2.016490066  | 8.557080124  |
| O  | 10.344850097 | 0.873664812  | 7.189402297  |
| O  | 10.515022028 | 0.884711415  | 10.007698108 |
| Al | 10.483435980 | 3.916592718  | 11.270155081 |
| O  | 10.454769202 | 5.150947029  | 9.941730872  |
| O  | 10.514008796 | 5.087338427  | 7.299111303  |
| Al | 14.579099164 | 3.973718475  | 7.343716327  |
| O  | 14.651606173 | 2.898908185  | 8.791619232  |
| O  | 14.723333346 | 2.982764825  | 11.373887448 |
| H  | 9.363529610  | 0.990803653  | 7.071437426  |
| H  | 13.377640755 | 1.362471453  | 6.725996555  |
| H  | 15.714057253 | 1.432617048  | 6.659239067  |
| H  | 14.642816893 | 7.781171783  | 5.467202838  |
| H  | 12.087110578 | 6.235794246  | 5.479245049  |
| H  | 9.083885429  | 6.664356141  | 5.097173800  |
| H  | 14.361086779 | 3.114378586  | 5.120198469  |
| H  | 16.602498458 | 4.891844631  | 6.357144435  |
| O  | 14.726669950 | 7.026005702  | 6.068171625  |
| O  | 11.980924588 | 7.089823809  | 5.933161233  |
| O  | 9.112678924  | 7.176418369  | 5.916354670  |
| O  | 14.646473126 | 2.832131691  | 6.000013590  |
| Al | 0.733887707  | 12.989282286 | 8.557269428  |
| Al | 4.869617286  | 14.988316140 | 7.070962066  |
| O  | 3.505364338  | 15.251997012 | 11.052785856 |
| O  | 7.693237201  | 12.980521826 | 9.755307305  |
| O  | 3.408251212  | 14.867016332 | 8.322220395  |
| O  | 7.722561796  | 12.994687206 | 7.051107909  |
| Al | 4.792952838  | 11.113240083 | 9.974635172  |
| Al | 0.724432448  | 9.149040655  | 11.446540931 |
| O  | 7.636123918  | 8.942115154  | 7.368394985  |
| O  | 3.502572540  | 11.047178227 | 8.564102090  |
| O  | 7.623035200  | 9.270140825  | 10.158425491 |
| O  | 3.518047124  | 10.925003896 | 11.271718957 |
| Al | 7.780700795  | 11.170413791 | 10.013954929 |
| Al | 3.548587288  | 9.062809716  | 11.372012300 |
| O  | 4.990915846  | 8.861280714  | 7.347905498  |
| O  | 0.616363935  | 11.173788103 | 8.712612170  |
| O  | 5.056114259  | 9.188835592  | 10.150932263 |
| O  | 0.711156071  | 11.044617302 | 11.372814495 |
| Al | 3.494503760  | 12.908649409 | 8.369575708  |
| Al | 7.700293724  | 15.087879315 | 7.137558044  |

|    |              |              |              |
|----|--------------|--------------|--------------|
| O  | 0.794574481  | 15.238600273 | 11.129329116 |
| O  | 4.824501049  | 12.917207566 | 9.767260658  |
| O  | 0.776628578  | 14.921963635 | 8.381974007  |
| O  | 4.898871311  | 13.076632143 | 7.122142454  |
| Al | 6.318121028  | 9.031967055  | 8.692517935  |
| Al | 6.327234130  | 8.971409727  | 11.510718144 |
| Al | 6.216821085  | 13.971650293 | 9.855062016  |
| O  | 6.481208399  | 15.027871190 | 11.284718063 |
| O  | 6.301460926  | 15.109184752 | 8.444465136  |
| Al | 2.162164068  | 15.086684691 | 9.809336500  |
| Al | 2.094416289  | 14.917170071 | 6.983528604  |
| Al | 1.992513688  | 10.091686648 | 8.602488128  |
| O  | 2.109897734  | 8.952001447  | 7.192786856  |
| O  | 2.043582119  | 8.950737378  | 10.005558290 |
| Al | 2.170844352  | 12.078542204 | 11.356412926 |
| O  | 2.105790211  | 13.154722752 | 9.836632452  |
| O  | 2.024316434  | 13.058311229 | 7.206761266  |
| Al | 6.202042125  | 11.911081108 | 7.185517608  |
| O  | 6.267065071  | 10.919141555 | 8.697854319  |
| O  | 6.301120967  | 11.068478332 | 11.284468363 |
| H  | 2.345712437  | 9.362494318  | 6.346037957  |
| H  | 4.167751675  | 9.329966016  | 7.579005243  |
| H  | 7.394685941  | 9.555721764  | 6.632258971  |
| H  | 6.348096346  | 14.257578955 | 5.255857702  |
| H  | 3.515132341  | 14.173529566 | 5.261321894  |
| H  | 0.570639229  | 15.657156332 | 5.078975837  |
| H  | 5.720720422  | 10.274616751 | 5.659277570  |
| H  | 8.282510924  | 12.770152784 | 6.279136369  |
| O  | 6.317459240  | 15.019822594 | 5.851465044  |
| O  | 3.492677618  | 15.011477716 | 5.753242159  |
| O  | 0.618754045  | 15.083969610 | 5.854809660  |
| O  | 6.464656554  | 10.893094015 | 5.768083038  |
| Al | 9.139102027  | 12.967479984 | 8.537969851  |
| Al | 13.255933517 | 15.073034444 | 7.220798769  |
| O  | 11.839446389 | 15.260872182 | 11.275801879 |
| O  | 16.133923423 | 13.067822275 | 9.903589828  |
| O  | 11.776275115 | 14.918835770 | 8.468460354  |
| O  | 16.129692421 | 13.078658055 | 7.183307695  |
| Al | 13.226476894 | 11.158902857 | 10.112995183 |
| Al | 9.074615386  | 9.180412400  | 11.412576355 |
| O  | 16.116705410 | 8.948081941  | 7.521100223  |
| O  | 11.938904739 | 11.075651277 | 8.712894090  |
| O  | 16.024215006 | 9.275286740  | 10.253073867 |
| O  | 11.924683377 | 10.968776250 | 11.422827293 |
| Al | 16.207487425 | 11.203357807 | 10.118047859 |
| Al | 11.971156323 | 9.093570280  | 11.428333725 |
| O  | 13.462074720 | 8.934926328  | 7.436782142  |
| O  | 9.041831442  | 11.141674705 | 8.643837880  |
| O  | 13.468899819 | 9.213662199  | 10.247442396 |
| O  | 9.105899645  | 11.047461395 | 11.352523925 |
| Al | 11.911777736 | 12.947680059 | 8.486424172  |
| Al | 16.137859492 | 15.222838786 | 7.235588090  |
| O  | 9.127488142  | 15.249960702 | 11.198716581 |
| O  | 13.234528119 | 12.977380028 | 9.917754051  |
| O  | 9.122762300  | 14.861274500 | 8.394741143  |
| O  | 13.321852926 | 13.154693302 | 7.275911973  |
| Al | 14.756168534 | 9.068288144  | 8.806368554  |
| Al | 14.753600830 | 8.937493187  | 11.625607603 |
| Al | 14.641947792 | 14.020847434 | 9.955627974  |
| O  | 14.494914465 | 15.080508880 | 11.422933008 |
| O  | 14.720518528 | 15.167592349 | 8.568535756  |

|    |              |              |              |
|----|--------------|--------------|--------------|
| Al | 10.520809339 | 15.095986823 | 9.869589443  |
| Al | 10.495511323 | 14.970152727 | 7.055684924  |
| Al | 10.449164080 | 10.113214691 | 8.648076038  |
| O  | 10.524399069 | 8.961286306  | 7.266608288  |
| O  | 10.462221084 | 9.023793858  | 10.076946990 |
| Al | 10.538563499 | 12.079902724 | 11.363919389 |
| O  | 10.506464873 | 13.168275877 | 9.911649132  |
| O  | 10.504683183 | 13.069585926 | 7.283554400  |
| Al | 14.622715266 | 11.984820176 | 7.312409514  |
| O  | 14.712247446 | 10.980377064 | 8.815699273  |
| O  | 14.719327260 | 11.123315785 | 11.415859001 |
| H  | 9.954754257  | 9.257488155  | 6.536090688  |
| H  | 12.648582546 | 9.455522735  | 7.569545065  |
| H  | 15.952984942 | 9.607837264  | 6.809202049  |
| H  | 14.725368617 | 14.454263293 | 5.344694647  |
| H  | 11.956712732 | 14.230602449 | 5.390618243  |
| H  | 9.047747785  | 15.584668286 | 5.114918151  |
| H  | 14.237163940 | 10.323986814 | 5.785303896  |
| H  | 16.665087773 | 12.828978542 | 6.399220708  |
| O  | 14.719403974 | 15.166616299 | 6.000367726  |
| O  | 11.919826582 | 15.083523192 | 5.857095577  |
| O  | 9.051607525  | 14.940365523 | 5.838181892  |
| O  | 14.952420783 | 10.970802212 | 5.918247520  |
| O  | 7.700974449  | 9.195557711  | 12.712461944 |
| H  | 7.779082541  | 8.484657900  | 13.370731926 |
| H  | 14.653113036 | 11.740556651 | 12.160998233 |
| O  | 13.325909054 | 9.029258119  | 12.787056164 |
| O  | 10.513328408 | 9.027526167  | 12.737460147 |
| O  | -0.626537855 | 9.030842623  | 12.793999572 |
| H  | -0.585117780 | 9.782399722  | 13.403277408 |
| O  | 2.415754433  | 13.234020173 | 12.649543796 |
| O  | 10.587514836 | 13.313009482 | 12.649915480 |
| H  | 7.487225668  | 14.962782260 | 11.322124117 |
| H  | 13.498880834 | 14.999927872 | 11.542849789 |
| H  | 3.346728979  | 14.593431336 | 11.774487798 |
| H  | 11.528336125 | 14.707276997 | 12.035745590 |
| O  | 1.873433503  | 5.002748601  | 12.791856634 |
| H  | 7.555276153  | 6.948840610  | 11.450988217 |
| H  | 4.143582239  | 6.555355022  | 11.087429411 |
| H  | 15.966585646 | 6.951892492  | 11.498914922 |
| O  | 7.701956665  | 0.967521617  | 12.638571541 |
| H  | 7.781686661  | 0.316056705  | 13.348390914 |
| O  | -0.697771946 | 0.887182740  | 12.713085291 |
| H  | -0.617071914 | 0.111544124  | 13.288414372 |
| H  | 6.339033467  | 3.460023965  | 12.076273540 |
| O  | 4.901559003  | 0.817255876  | 12.641339078 |
| O  | 2.098007176  | 0.882186958  | 12.563654783 |
| H  | 14.801755162 | 3.591218054  | 12.126474699 |
| O  | 13.259171601 | 0.892640765  | 12.787069109 |
| O  | 10.439712139 | 0.963533325  | 12.641614239 |
| O  | 2.171638404  | 9.113864754  | 12.641104360 |
| O  | 4.913943350  | 8.942839924  | 12.698593702 |
| H  | 2.170628323  | 8.323917269  | 13.203132442 |
| H  | 4.860337311  | 9.670183133  | 13.335912512 |
| H  | 13.184585179 | 8.209986002  | 13.306424408 |
| H  | 10.541649408 | 9.658470583  | 13.473728478 |
| H  | 13.247290151 | 1.628448886  | 13.416305620 |
| H  | 10.382153209 | 1.716341114  | 13.249394302 |
| H  | 2.093608184  | 1.623843124  | 13.188834680 |
| H  | 4.807889261  | -0.009561691 | 13.138350332 |
| H  | 9.449972882  | 14.746133105 | 11.981155723 |



|   |              |              |              |
|---|--------------|--------------|--------------|
| H | 10.668244852 | 13.054876808 | 13.577902734 |
| H | 1.716018241  | 13.909943180 | 12.690693503 |
| H | 0.063641509  | 14.625247571 | 10.933288987 |
| H | 1.072623318  | 6.577344857  | 12.006791099 |
| H | 2.696524489  | 5.429237823  | 13.076956217 |
| H | 6.300163523  | 11.676626745 | 12.040314669 |
| W | 10.525644166 | 6.679372103  | 12.939958406 |
| O | 10.517158968 | 4.920552028  | 12.791038661 |
| O | 9.202889566  | 7.260004788  | 11.445943988 |
| H | 12.069137583 | 7.054071220  | 13.545001330 |
| C | 8.728498995  | 6.896702756  | 14.206931544 |
| H | 8.594908293  | 7.910142602  | 14.626263667 |
| C | 10.757640906 | 6.583361686  | 15.142210796 |
| C | 9.327676444  | 6.079697682  | 15.353607350 |
| C | 8.709469519  | 6.282009401  | 16.744264697 |
| H | 8.760920674  | 7.356776897  | 16.992086785 |
| H | 9.328067204  | 5.760587259  | 17.494280075 |
| H | 7.790342076  | 6.536680569  | 13.755874808 |
| H | 10.824305695 | 7.609073662  | 15.547806711 |
| H | 9.284860036  | 5.004259746  | 15.105097053 |
| C | 7.261849613  | 5.793961243  | 16.832934231 |
| H | 6.622148909  | 6.319517860  | 16.109079694 |
| H | 7.194538883  | 4.718354035  | 16.610617512 |
| H | 6.837199370  | 5.955619757  | 17.833674662 |
| C | 11.896070674 | 5.727492063  | 15.690708634 |
| H | 11.781644699 | 5.571190492  | 16.776855005 |
| H | 11.910364759 | 4.737049649  | 15.211979832 |
| H | 12.879780214 | 6.186986501  | 15.519852207 |

**1-butene (2,1) insertion (side path) into 2c species. E: -2343.107270378**

|    |             |             |              |
|----|-------------|-------------|--------------|
| Al | 0.723433148 | 4.902983611 | 8.589647970  |
| Al | 4.871102521 | 6.973635465 | 7.183474147  |
| O  | 3.416308522 | 7.190352725 | 11.203857793 |
| O  | 7.701560921 | 4.853051711 | 9.759229202  |
| O  | 3.397486719 | 6.844980115 | 8.431840954  |
| O  | 7.775091590 | 5.005553326 | 7.117394328  |
| Al | 4.785448873 | 3.070351303 | 10.031326367 |
| Al | 0.664142613 | 0.966671553 | 11.342207181 |
| O  | 7.629668228 | 0.807985240 | 7.279964072  |
| O  | 3.510562194 | 3.061392558 | 8.643964761  |
| O  | 7.573627075 | 1.126855525 | 10.080974933 |
| O  | 3.508841563 | 2.884139956 | 11.349520235 |
| Al | 7.772520952 | 3.022934768 | 9.937793368  |
| Al | 3.511817584 | 0.974459233 | 11.336593305 |
| O  | 4.992882484 | 0.728835034 | 7.213195692  |
| O  | 0.618473620 | 3.070452705 | 8.640439427  |
| O  | 4.995894566 | 1.132620079 | 10.084349185 |
| O  | 0.688803861 | 2.840824205 | 11.284695725 |
| Al | 3.490638763 | 4.895068550 | 8.468153709  |
| Al | 7.738776435 | 7.116339561 | 7.192871781  |
| O  | 0.766616335 | 7.188998239 | 11.287766887 |
| O  | 4.838910208 | 4.929958010 | 9.925549248  |
| O  | 0.773992077 | 6.850835359 | 8.473316287  |
| O  | 4.913091184 | 5.082367128 | 7.268605548  |
| Al | 6.240308997 | 0.943551479 | 8.614378278  |
| Al | 6.287078219 | 0.838430195 | 11.440488740 |
| Al | 6.307407082 | 5.916834234 | 9.885801587  |
| O  | 6.544251834 | 7.038765764 | 11.285378870 |
| O  | 6.325898672 | 7.085969994 | 8.500223167  |
| Al | 2.076917376 | 7.019268568 | 9.905320229  |
| Al | 2.094419563 | 6.872346458 | 7.072289170  |

|    |              |             |              |
|----|--------------|-------------|--------------|
| Al | 2.046873170  | 2.052684788 | 8.573186293  |
| O  | 2.186904972  | 0.954510112 | 7.126880293  |
| O  | 2.102586666  | 0.876273978 | 9.928688590  |
| Al | 2.074863712  | 3.951423519 | 11.383379107 |
| O  | 2.096732204  | 5.088155931 | 9.918664533  |
| O  | 2.038638177  | 5.008862898 | 7.284163234  |
| Al | 6.221513832  | 3.922755762 | 7.191243898  |
| O  | 6.255585485  | 2.852272836 | 8.652951208  |
| O  | 6.300900086  | 2.911597621 | 11.274598085 |
| H  | 1.923308963  | 1.380732536 | 6.296700020  |
| H  | 4.109449953  | 1.140827410 | 7.281257682  |
| H  | 7.336372790  | 1.401447236 | 6.543313163  |
| H  | 6.271875920  | 7.686256559 | 5.308601929  |
| H  | 3.572542328  | 6.206461694 | 5.316678026  |
| H  | 0.614179314  | 7.599985245 | 5.205890497  |
| H  | 5.885238072  | 2.434798174 | 5.405955751  |
| H  | 8.272333182  | 4.718807503 | 6.325760465  |
| O  | 6.318857815  | 6.944805992 | 5.931080316  |
| O  | 3.503634891  | 7.020885763 | 5.842948627  |
| O  | 0.625600828  | 6.947149364 | 5.919019727  |
| O  | 6.606935908  | 2.976440361 | 5.763550494  |
| Al | 9.153373410  | 4.911905731 | 8.567604630  |
| Al | 13.292082088 | 7.051904493 | 7.311096156  |
| O  | 11.665417819 | 7.256690183 | 11.372868028 |
| O  | 16.116637115 | 4.908337870 | 9.837559702  |
| O  | 11.782585188 | 6.930862030 | 8.555180265  |
| O  | 16.116330987 | 5.060228154 | 7.191260678  |
| Al | 13.204592119 | 3.097181997 | 10.111943350 |
| Al | 9.074262706  | 1.032623066 | 11.341334846 |
| O  | 15.977554427 | 0.890005324 | 7.433073138  |
| O  | 11.925367476 | 3.124466924 | 8.737375281  |
| O  | 15.951414827 | 1.130362894 | 10.170803229 |
| O  | 11.917402093 | 2.893146663 | 11.428170724 |
| Al | 16.188118744 | 3.057431724 | 10.028403521 |
| Al | 11.895795767 | 1.016513901 | 11.446097116 |
| O  | 13.249317034 | 0.791988422 | 7.508076278  |
| O  | 9.114723671  | 3.062872672 | 8.638415342  |
| O  | 13.396182392 | 1.150172851 | 10.235756908 |
| O  | 9.054992859  | 2.901859876 | 11.284566974 |
| Al | 11.920578804 | 4.964470658 | 8.572795147  |
| Al | 16.151039381 | 7.132628923 | 7.296601021  |
| O  | 13.240943032 | 4.929121180 | 9.999144964  |
| O  | 9.127468252  | 6.862279585 | 8.480302526  |
| O  | 13.316575919 | 5.166513638 | 7.358095023  |
| Al | 14.637797481 | 0.978101178 | 8.758606167  |
| Al | 14.692729149 | 0.879756868 | 11.574888714 |
| Al | 14.677071884 | 5.944552072 | 10.029725092 |
| O  | 14.958266822 | 7.025481645 | 11.443400955 |
| O  | 14.736158510 | 7.116241468 | 8.637965538  |
| Al | 10.460047484 | 7.091074521 | 9.962975224  |
| Al | 10.532394111 | 6.953185488 | 7.139962149  |
| Al | 10.563297434 | 2.018793078 | 8.560196545  |
| O  | 10.345574764 | 0.875333366 | 7.190787403  |
| O  | 10.515096286 | 0.884158923 | 10.008405277 |
| Al | 10.493910855 | 3.912484204 | 11.290976729 |
| O  | 10.449418347 | 5.156758665 | 9.984479866  |
| O  | 10.515309015 | 5.086733163 | 7.346632797  |
| Al | 14.578643124 | 3.973633476 | 7.343910399  |
| O  | 14.651722128 | 2.898561837 | 8.791787418  |
| O  | 14.723605258 | 2.982418160 | 11.373449445 |
| H  | 9.364357403  | 0.992117105 | 7.072161259  |

|    |              |              |              |
|----|--------------|--------------|--------------|
| H  | 13.377890402 | 1.362054768  | 6.725723457  |
| H  | 15.713908058 | 1.432552106  | 6.659321441  |
| H  | 14.642936351 | 7.782565737  | 5.468901019  |
| H  | 12.086074208 | 6.232373966  | 5.482404834  |
| H  | 9.083823838  | 6.666853873  | 5.096897907  |
| H  | 14.363547771 | 3.114648731  | 5.119522503  |
| H  | 16.602846897 | 4.891273933  | 6.357548534  |
| O  | 14.726129604 | 7.025873191  | 6.068075093  |
| O  | 11.975118290 | 7.084561645  | 5.938468404  |
| O  | 9.114092935  | 7.174407965  | 5.918824227  |
| O  | 14.646383899 | 2.832165679  | 6.000067035  |
| Al | 0.733774942  | 12.988440118 | 8.557380755  |
| Al | 4.869633159  | 14.988790937 | 7.070967172  |
| O  | 3.505419874  | 15.251898449 | 11.052682741 |
| O  | 7.692259617  | 12.981489961 | 9.754920765  |
| O  | 3.408292182  | 14.866795103 | 8.322269897  |
| O  | 7.722705435  | 12.994835744 | 7.051011555  |
| Al | 4.791448101  | 11.113000170 | 9.973446965  |
| Al | 0.724172059  | 9.148713583  | 11.446734254 |
| O  | 7.636250977  | 8.941135036  | 7.368757452  |
| O  | 3.502571065  | 11.047339313 | 8.564001852  |
| O  | 7.623524034  | 9.272151185  | 10.158685067 |
| O  | 3.518116523  | 10.924821940 | 11.271835705 |
| Al | 7.778992771  | 11.173017897 | 10.010771259 |
| Al | 3.548359711  | 9.062411075  | 11.371708313 |
| O  | 4.990676560  | 8.861504975  | 7.347350825  |
| O  | 0.616159940  | 11.172096040 | 8.712612079  |
| O  | 5.056144283  | 9.190425471  | 10.150815064 |
| O  | 0.711219338  | 11.044420838 | 11.372730827 |
| Al | 3.494412065  | 12.909147845 | 8.369466253  |
| Al | 7.700325351  | 15.088573465 | 7.137547000  |
| O  | 0.794695432  | 15.238585601 | 11.129422902 |
| O  | 4.824815404  | 12.917096737 | 9.767645710  |
| O  | 0.776664996  | 14.921811371 | 8.382042307  |
| O  | 4.898766756  | 13.076679119 | 7.122003541  |
| Al | 6.317213601  | 9.032079443  | 8.691603312  |
| Al | 6.327733955  | 8.977404819  | 11.511214707 |
| Al | 6.216090266  | 13.973644258 | 9.855587780  |
| O  | 6.481098044  | 15.030282919 | 11.284707434 |
| O  | 6.301359430  | 15.109801082 | 8.444167338  |
| Al | 2.161967781  | 15.086785165 | 9.809440602  |
| Al | 2.094336306  | 14.917185099 | 6.983617792  |
| Al | 1.992775060  | 10.091217804 | 8.602733483  |
| O  | 2.109994204  | 8.951981759  | 7.192829457  |
| O  | 2.044547565  | 8.950456052  | 10.005714234 |
| Al | 2.170667309  | 12.078468544 | 11.356559117 |
| O  | 2.105808634  | 13.154491609 | 9.836575331  |
| O  | 2.024313313  | 13.058106984 | 7.206817654  |
| Al | 6.202292291  | 11.911799506 | 7.184863904  |
| O  | 6.268234366  | 10.919849375 | 8.697669535  |
| O  | 6.301959513  | 11.067002662 | 11.286188206 |
| H  | 2.337309020  | 9.363962817  | 6.344510513  |
| H  | 4.166428558  | 9.329563879  | 7.575760815  |
| H  | 7.395838382  | 9.554894505  | 6.632498498  |
| H  | 6.348183827  | 14.257759516 | 5.255724639  |
| H  | 3.515287653  | 14.173548157 | 5.261456500  |
| H  | 0.570586202  | 15.656846241 | 5.078844748  |
| H  | 5.720939299  | 10.274142740 | 5.659826618  |
| H  | 8.282890278  | 12.770491299 | 6.279152273  |
| O  | 6.317499888  | 15.019909355 | 5.851432352  |
| O  | 3.492635248  | 15.011532730 | 5.753305545  |

|    |              |              |              |
|----|--------------|--------------|--------------|
| O  | 0.618792642  | 15.083844440 | 5.854804338  |
| O  | 6.464553302  | 10.893115023 | 5.767990916  |
| Al | 9.139495639  | 12.968277281 | 8.537788775  |
| Al | 13.255970178 | 15.072921607 | 7.220930589  |
| O  | 11.839439569 | 15.259820698 | 11.276087813 |
| O  | 16.133949750 | 13.067420313 | 9.903457814  |
| O  | 11.776349960 | 14.918732805 | 8.468620163  |
| O  | 16.129622891 | 13.078408813 | 7.183540818  |
| Al | 13.225110776 | 11.157241050 | 10.114610596 |
| Al | 9.075769777  | 9.193018522  | 11.405485897 |
| O  | 16.116430667 | 8.947820996  | 7.521265386  |
| O  | 11.938756579 | 11.075547741 | 8.712980775  |
| O  | 16.023600920 | 9.275118311  | 10.253558237 |
| O  | 11.924147260 | 10.967211777 | 11.424035824 |
| Al | 16.206968630 | 11.202825228 | 10.118495337 |
| Al | 11.969297728 | 9.087430402  | 11.434084679 |
| O  | 13.461687034 | 8.933294588  | 7.436730097  |
| O  | 9.041762033  | 11.142186008 | 8.643576018  |
| O  | 13.468392630 | 9.212840226  | 10.248718730 |
| O  | 9.104368969  | 11.050964422 | 11.351221775 |
| Al | 11.912001366 | 12.947666929 | 8.486708524  |
| Al | 16.137999474 | 15.222631711 | 7.235632481  |
| O  | 9.127582126  | 15.249846877 | 11.198887242 |
| O  | 13.234384309 | 12.976609276 | 9.917854703  |
| O  | 9.122819306  | 14.861626471 | 8.394720148  |
| O  | 13.321838026 | 13.154656417 | 7.275904054  |
| Al | 14.755766406 | 9.067908471  | 8.807189300  |
| Al | 14.752544453 | 8.936922408  | 11.627029018 |
| Al | 14.641821272 | 14.020202601 | 9.955516555  |
| O  | 14.495206662 | 15.079694463 | 11.423025069 |
| O  | 14.720705165 | 15.167319061 | 8.568524922  |
| Al | 10.520560217 | 15.096194547 | 9.869756951  |
| Al | 10.495761033 | 14.970946651 | 7.056054750  |
| Al | 10.449190173 | 10.113931299 | 8.646786213  |
| O  | 10.524766404 | 8.960413150  | 7.267479988  |
| O  | 10.459413412 | 9.024612577  | 10.075594144 |
| Al | 10.539861876 | 12.080313749 | 11.364550432 |
| O  | 10.506478076 | 13.168218853 | 9.911708952  |
| O  | 10.504787172 | 13.069628700 | 7.283501574  |
| Al | 14.622421780 | 11.984494420 | 7.312941520  |
| O  | 14.711848977 | 10.979992153 | 8.816191363  |
| O  | 14.719101106 | 11.122967029 | 11.417510175 |
| H  | 9.955866277  | 9.253423656  | 6.535199771  |
| H  | 12.647852289 | 9.453434556  | 7.568991930  |
| H  | 15.952219755 | 9.607686387  | 6.809584800  |
| H  | 14.725363987 | 14.453850856 | 5.344912270  |
| H  | 11.956156127 | 14.230462285 | 5.391024238  |
| H  | 9.048018334  | 15.585009606 | 5.114942341  |
| H  | 14.236852110 | 10.324539439 | 5.784361088  |
| H  | 16.664686590 | 12.828709065 | 6.399245812  |
| O  | 14.719408990 | 15.166327976 | 6.000453659  |
| O  | 11.919826551 | 15.083572052 | 5.857207840  |
| O  | 9.051925393  | 14.940823127 | 5.838316087  |
| O  | 14.952350085 | 10.970803277 | 5.918378689  |
| O  | 7.708668723  | 9.191277446  | 12.718996175 |
| H  | 7.808407661  | 8.452325954  | 13.346251194 |
| H  | 14.652590225 | 11.740796978 | 12.162154108 |
| O  | 13.323969936 | 9.024414310  | 12.789656617 |
| O  | 10.501856036 | 9.028148598  | 12.728913830 |
| O  | -0.626641880 | 9.030729284  | 12.793991210 |
| H  | -0.585062492 | 9.780316064  | 13.405618976 |

|   |              |              |              |
|---|--------------|--------------|--------------|
| O | 2.415825500  | 13.233964617 | 12.649536635 |
| O | 10.587373043 | 13.313122674 | 12.650273688 |
| H | 7.486971202  | 14.965048238 | 11.322313897 |
| H | 13.499272587 | 14.998784283 | 11.543270447 |
| H | 3.346555846  | 14.593591332 | 11.774556090 |
| H | 11.527835157 | 14.706374091 | 12.036023074 |
| O | 1.874032347  | 5.002329918  | 12.792421781 |
| H | 7.544004691  | 6.960539753  | 11.445642312 |
| H | 4.141747484  | 6.551569195  | 11.095952363 |
| H | 15.966759688 | 6.951610983  | 11.500888276 |
| O | 7.702564485  | 0.968487410  | 12.639093945 |
| H | 7.780465317  | 0.318664564  | 13.350558964 |
| O | -0.697516311 | 0.887126327  | 12.713047227 |
| H | -0.616262167 | 0.112812069  | 13.290052002 |
| H | 6.344642895  | 3.462533649  | 12.073430949 |
| O | 4.901646262  | 0.817291801  | 12.641565485 |
| O | 2.098198031  | 0.882264209  | 12.563604908 |
| H | 14.799723818 | 3.591190753  | 12.125993232 |
| O | 13.260133360 | 0.891970316  | 12.787362467 |
| O | 10.440210428 | 0.962644377  | 12.641949547 |
| O | 2.171931124  | 9.113743207  | 12.641289777 |
| O | 4.914857915  | 8.943722640  | 12.699681901 |
| H | 2.170727176  | 8.322817242  | 13.202098087 |
| H | 4.857596042  | 9.667352485  | 13.340891212 |
| H | 13.183093563 | 8.202913921  | 13.305145706 |
| H | 10.529427513 | 9.642933840  | 13.478705586 |
| H | 13.247200125 | 1.632153083  | 13.411480835 |
| H | 10.384500281 | 1.710706153  | 13.255485990 |
| H | 2.094005259  | 1.623867613  | 13.188849581 |
| H | 4.809548865  | -0.010398278 | 13.137363371 |
| H | 9.449405552  | 14.745216082 | 11.981087479 |
| H | 10.668095433 | 13.054410101 | 13.578145050 |
| H | 1.715939441  | 13.909686041 | 12.691254010 |
| H | 0.063571495  | 14.625379484 | 10.933795410 |
| H | 1.077617693  | 6.580017945  | 12.008184395 |
| H | 2.701672346  | 5.400432138  | 13.104065880 |
| H | 6.299211249  | 11.677627125 | 12.040167201 |
| W | 10.459653919 | 6.671435437  | 12.927905649 |
| O | 10.600990819 | 4.917442571  | 12.812504013 |
| O | 9.196448755  | 7.265309141  | 11.441558403 |
| H | 11.988390090 | 7.046467262  | 13.578554928 |
| C | 8.526178241  | 6.338220552  | 14.060819133 |
| H | 7.873398372  | 7.215220817  | 14.221179444 |
| C | 10.433978654 | 7.088610187  | 15.109687699 |
| C | 9.281654589  | 6.126285425  | 15.376590923 |
| H | 10.033359187 | 8.115261007  | 15.198069039 |
| H | 9.658907625  | 5.091159192  | 15.429606212 |
| C | 11.672073032 | 6.941447306  | 15.984411159 |
| H | 12.144383982 | 5.958391953  | 15.840270482 |
| H | 12.430845509 | 7.705305197  | 15.759794277 |
| H | 8.712834601  | 6.306147594  | 16.310748880 |
| C | 7.654501807  | 5.173482391  | 13.575695597 |
| H | 8.152366145  | 4.232182047  | 13.858491386 |
| H | 7.617465062  | 5.152165604  | 12.477317011 |
| H | 11.412299027 | 7.028848777  | 17.054128050 |
| C | 6.224926712  | 5.208432712  | 14.133638431 |
| H | 5.632903988  | 4.325115087  | 13.838724084 |
| H | 6.229228706  | 5.234481516  | 15.233219011 |
| H | 5.694480749  | 6.100444270  | 13.769329787 |

isobutene (1,2) insertion (side path) into 2c species. E: -2343.108420107

|    |              |             |              |
|----|--------------|-------------|--------------|
| Al | 0.723172264  | 4.903220733 | 8.589587748  |
| Al | 4.871303145  | 6.973742375 | 7.185826404  |
| O  | 3.415428868  | 7.189787588 | 11.204167797 |
| O  | 7.705931177  | 4.851040375 | 9.754420830  |
| O  | 3.396545508  | 6.844959888 | 8.433820934  |
| O  | 7.771542243  | 5.004633355 | 7.113202994  |
| Al | 4.783621722  | 3.070357598 | 10.030861835 |
| Al | 0.663816714  | 0.966370888 | 11.342124406 |
| O  | 7.629678708  | 0.807617082 | 7.279992124  |
| O  | 3.510413262  | 3.061398574 | 8.643499919  |
| O  | 7.570895765  | 1.126065994 | 10.080243171 |
| O  | 3.508097878  | 2.884041681 | 11.349043239 |
| Al | 7.770804580  | 3.023899740 | 9.933445627  |
| Al | 3.511202252  | 0.974364817 | 11.336623732 |
| O  | 4.992936727  | 0.728541256 | 7.213206635  |
| O  | 0.618313478  | 3.070499164 | 8.640535504  |
| O  | 4.995444196  | 1.132649918 | 10.084729811 |
| O  | 0.688363433  | 2.840669090 | 11.285044746 |
| Al | 3.490273512  | 4.895671021 | 8.469003860  |
| Al | 7.738510916  | 7.120294789 | 7.192155081  |
| O  | 0.765815118  | 7.189299062 | 11.287148703 |
| O  | 4.839854322  | 4.929970546 | 9.925716870  |
| O  | 0.773840489  | 6.850895242 | 8.473177901  |
| O  | 4.911963463  | 5.082484320 | 7.268481039  |
| Al | 6.239837702  | 0.941519265 | 8.614816864  |
| Al | 6.286248943  | 0.833720125 | 11.440064386 |
| Al | 6.313807943  | 5.913320557 | 9.889631884  |
| O  | 6.551390937  | 7.026097624 | 11.294260665 |
| O  | 6.326832191  | 7.085640259 | 8.502916405  |
| Al | 2.075906751  | 7.019988172 | 9.904950525  |
| Al | 2.094402113  | 6.872643492 | 7.072410346  |
| Al | 2.046517016  | 2.052666972 | 8.572952063  |
| O  | 2.186912366  | 0.954586192 | 7.126784298  |
| O  | 2.102434780  | 0.876324834 | 9.928607668  |
| Al | 2.073767077  | 3.951290649 | 11.382733639 |
| O  | 2.096746470  | 5.088055384 | 9.918496337  |
| O  | 2.038602845  | 5.009017970 | 7.284346175  |
| Al | 6.217464558  | 3.921117093 | 7.191359929  |
| O  | 6.254383996  | 2.850283373 | 8.652421639  |
| O  | 6.300405282  | 2.913172425 | 11.275683761 |
| H  | 1.924903191  | 1.380966015 | 6.296177891  |
| H  | 4.109195459  | 1.139792076 | 7.281910115  |
| H  | 7.335582419  | 1.400517243 | 6.543268664  |
| H  | 6.270531601  | 7.685383553 | 5.308314768  |
| H  | 3.572941945  | 6.206186069 | 5.318081238  |
| H  | 0.614607361  | 7.601140068 | 5.206890526  |
| H  | 5.885200154  | 2.434720584 | 5.403597884  |
| H  | 8.258899393  | 4.724222612 | 6.312791482  |
| O  | 6.318581998  | 6.944953498 | 5.931924330  |
| O  | 3.503852505  | 7.021148399 | 5.843488631  |
| O  | 0.625719099  | 6.947132153 | 5.918975972  |
| O  | 6.605837214  | 2.976156406 | 5.763602594  |
| Al | 9.152578385  | 4.910026646 | 8.536990636  |
| Al | 13.291800431 | 7.054228915 | 7.309709324  |
| O  | 11.678152791 | 7.258507781 | 11.366560411 |
| O  | 16.116257108 | 4.908581922 | 9.837490783  |
| O  | 11.779328787 | 6.930128918 | 8.549487495  |
| O  | 16.116509379 | 5.060304307 | 7.191168347  |
| Al | 13.204908964 | 3.100099336 | 10.109202796 |
| Al | 9.072379676  | 1.031347154 | 11.340333624 |
| O  | 15.977545589 | 0.890037651 | 7.433125781  |

|    |              |              |              |
|----|--------------|--------------|--------------|
| O  | 11.923217051 | 3.124947158  | 8.732685569  |
| O  | 15.951205643 | 1.130544416  | 10.170784633 |
| O  | 11.913860224 | 2.895775765  | 11.423351250 |
| Al | 16.187820600 | 3.057902733  | 10.028491999 |
| Al | 11.895150812 | 1.017915801  | 11.445887657 |
| O  | 13.249042837 | 0.792235968  | 7.508087237  |
| O  | 9.117086045  | 3.061487447  | 8.635518061  |
| O  | 13.395875652 | 1.151561183  | 10.235479805 |
| O  | 9.046887317  | 2.899346278  | 11.280990609 |
| Al | 11.912881895 | 4.965169366  | 8.552562701  |
| Al | 16.151010323 | 7.132982237  | 7.296441753  |
| O  | 13.239303472 | 4.929402447  | 9.997232893  |
| O  | 9.127477680  | 6.861302962  | 8.474258951  |
| O  | 13.317613293 | 5.166900997  | 7.356520775  |
| Al | 14.637905878 | 0.978049087  | 8.758733938  |
| Al | 14.692260223 | 0.881191146  | 11.574878153 |
| Al | 14.674729252 | 5.944303386  | 10.028855420 |
| O  | 14.957864160 | 7.025584531  | 11.442973091 |
| O  | 14.735927147 | 7.116899162  | 8.637620419  |
| Al | 10.446905222 | 7.089901439  | 9.961287614  |
| Al | 10.533912295 | 6.956868995  | 7.128682503  |
| Al | 10.564765491 | 2.013987178  | 8.554183482  |
| O  | 10.343770556 | 0.872390086  | 7.187910960  |
| O  | 10.514967014 | 0.884493608  | 10.007030707 |
| Al | 10.484439087 | 3.903361754  | 11.233708618 |
| O  | 10.453687414 | 5.152604546  | 9.928772812  |
| O  | 10.513826390 | 5.087362811  | 7.293775540  |
| Al | 14.579556075 | 3.973993038  | 7.343465986  |
| O  | 14.651533186 | 2.898677427  | 8.791386432  |
| O  | 14.723347534 | 2.982568925  | 11.373549329 |
| H  | 9.362136434  | 0.989096998  | 7.070701110  |
| H  | 13.379109147 | 1.362018437  | 6.725670661  |
| H  | 15.714224814 | 1.432602966  | 6.659278033  |
| H  | 14.643169516 | 7.780598362  | 5.466521323  |
| H  | 12.087335263 | 6.236487508  | 5.478265256  |
| H  | 9.083802042  | 6.663340132  | 5.097347107  |
| H  | 14.360785782 | 3.114195464  | 5.120254732  |
| H  | 16.602830150 | 4.892093272  | 6.357170759  |
| O  | 14.726734127 | 7.026012609  | 6.068239658  |
| O  | 11.981473954 | 7.090423987  | 5.932397444  |
| O  | 9.112404591  | 7.176599476  | 5.915808543  |
| O  | 14.646485300 | 2.832084788  | 6.000022129  |
| Al | 0.733894687  | 12.989399336 | 8.557303938  |
| Al | 4.869476099  | 14.988192245 | 7.070888942  |
| O  | 3.505330548  | 15.251991131 | 11.052797047 |
| O  | 7.693271759  | 12.980333548 | 9.755381673  |
| O  | 3.408198094  | 14.867089486 | 8.322205079  |
| O  | 7.722410638  | 12.994682799 | 7.051098998  |
| Al | 4.792740328  | 11.113517708 | 9.974571241  |
| Al | 0.724214314  | 9.149015325  | 11.446547701 |
| O  | 7.636007617  | 8.942787832  | 7.368167876  |
| O  | 3.502424398  | 11.047213590 | 8.564081315  |
| O  | 7.622645249  | 9.270097262  | 10.158128585 |
| O  | 3.517867914  | 10.925055848 | 11.271648913 |
| Al | 7.780681506  | 11.170094540 | 10.014456021 |
| Al | 3.548128350  | 9.062943424  | 11.372049384 |
| O  | 4.990816805  | 8.861309921  | 7.347807826  |
| O  | 0.616322569  | 11.174072052 | 8.712600499  |
| O  | 5.055523288  | 9.188797038  | 10.150372896 |
| O  | 0.711072117  | 11.044643944 | 11.372788857 |
| Al | 3.494442155  | 12.908713359 | 8.369613801  |

|    |              |              |              |
|----|--------------|--------------|--------------|
| Al | 7.700119459  | 15.087516609 | 7.137598707  |
| O  | 0.794571707  | 15.238587511 | 11.129308289 |
| O  | 4.824293372  | 12.917360031 | 9.767229954  |
| O  | 0.776608020  | 14.921992453 | 8.381906159  |
| O  | 4.898778637  | 13.076693827 | 7.122052416  |
| Al | 6.318038287  | 9.032138270  | 8.692448862  |
| Al | 6.326069532  | 8.971938387  | 11.508689226 |
| Al | 6.216836826  | 13.971346739 | 9.855280798  |
| O  | 6.480686461  | 15.027515852 | 11.284851019 |
| O  | 6.301406654  | 15.108886100 | 8.444637387  |
| Al | 2.162168799  | 15.086672954 | 9.809374643  |
| Al | 2.094423159  | 14.917143492 | 6.983511791  |
| Al | 1.992392237  | 10.091802264 | 8.602471565  |
| O  | 2.109847709  | 8.952017100  | 7.192785580  |
| O  | 2.043209812  | 8.950786902  | 10.005572460 |
| Al | 2.170726631  | 12.078580666 | 11.356445303 |
| O  | 2.105759643  | 13.154757189 | 9.836610397  |
| O  | 2.024320920  | 13.058345776 | 7.206751957  |
| Al | 6.201769903  | 11.911070970 | 7.185492859  |
| O  | 6.266049303  | 10.919279207 | 8.697774891  |
| O  | 6.300676924  | 11.068931455 | 11.283911903 |
| H  | 2.346157748  | 9.362403103  | 6.346127555  |
| H  | 4.167815848  | 9.330109164  | 7.579258481  |
| H  | 7.394590089  | 9.556564243  | 6.632144271  |
| H  | 6.348000380  | 14.257603542 | 5.255821526  |
| H  | 3.515037457  | 14.173664984 | 5.261113535  |
| H  | 0.570788258  | 15.657114176 | 5.078818232  |
| H  | 5.721071068  | 10.273899944 | 5.660138440  |
| H  | 8.282208430  | 12.770013280 | 6.279060289  |
| O  | 6.317420086  | 15.019817781 | 5.851474289  |
| O  | 3.492646697  | 15.011515194 | 5.753199853  |
| O  | 0.618811104  | 15.084029899 | 5.854730387  |
| O  | 6.464630995  | 10.893017818 | 5.768163511  |
| Al | 9.138952711  | 12.967238681 | 8.538047739  |
| Al | 13.255869874 | 15.072838495 | 7.220864187  |
| O  | 11.839365696 | 15.260438032 | 11.275774532 |
| O  | 16.133920287 | 13.067851225 | 9.903665473  |
| O  | 11.776149545 | 14.918772270 | 8.468329313  |
| O  | 16.129686676 | 13.078733118 | 7.183218235  |
| Al | 13.226364375 | 11.158791527 | 10.113046009 |
| Al | 9.074082559  | 9.177539784  | 11.414286512 |
| O  | 16.116780027 | 8.948125828  | 7.521177743  |
| O  | 11.938400287 | 11.075245312 | 8.713065934  |
| O  | 16.023932045 | 9.275347314  | 10.253113598 |
| O  | 11.924495177 | 10.968614510 | 11.422969252 |
| Al | 16.207365197 | 11.203389915 | 10.118073712 |
| Al | 11.970665292 | 9.093516827  | 11.427831296 |
| O  | 13.462340372 | 8.935699342  | 7.436722712  |
| O  | 9.041597735  | 11.141743454 | 8.643859760  |
| O  | 13.468870263 | 9.214215553  | 10.247340224 |
| O  | 9.105888483  | 11.046602231 | 11.353003134 |
| Al | 11.911721026 | 12.947312708 | 8.486479887  |
| Al | 16.137964761 | 15.222607402 | 7.235386492  |
| O  | 9.127556448  | 15.249731388 | 11.198612778 |
| O  | 13.234451035 | 12.977279646 | 9.917710534  |
| O  | 9.122757595  | 14.861072041 | 8.394669672  |
| O  | 13.321799616 | 13.154619974 | 7.275879800  |
| Al | 14.756169327 | 9.068427473  | 8.806461603  |
| Al | 14.753227837 | 8.937857950  | 11.625743817 |
| Al | 14.641908247 | 14.020704974 | 9.955684830  |
| O  | 14.495108805 | 15.080173606 | 11.423160173 |



|    |              |              |              |
|----|--------------|--------------|--------------|
| O  | 14.720604521 | 15.167443881 | 8.568462878  |
| Al | 10.520625515 | 15.095534710 | 9.869478779  |
| Al | 10.495387015 | 14.969095753 | 7.055237126  |
| Al | 10.448378609 | 10.112937392 | 8.647991036  |
| O  | 10.524426580 | 8.961453791  | 7.266114581  |
| O  | 10.459539040 | 9.023899760  | 10.076753915 |
| Al | 10.538002455 | 12.079551290 | 11.363965562 |
| O  | 10.506436780 | 13.168031772 | 9.911611111  |
| O  | 10.504630714 | 13.069415332 | 7.283547521  |
| Al | 14.622756781 | 11.984783532 | 7.312334970  |
| O  | 14.712216340 | 10.980533374 | 8.815774361  |
| O  | 14.719317428 | 11.123342298 | 11.416317380 |
| H  | 9.955717849  | 9.258162092  | 6.535074503  |
| H  | 12.648718429 | 9.456007287  | 7.569996929  |
| H  | 15.953498125 | 9.607983534  | 6.809303833  |
| H  | 14.725258577 | 14.454553099 | 5.344370319  |
| H  | 11.957216278 | 14.230800855 | 5.390023230  |
| H  | 9.047540797  | 15.584072706 | 5.114660751  |
| H  | 14.237765083 | 10.323018904 | 5.786474077  |
| H  | 16.665275894 | 12.828845545 | 6.399319183  |
| O  | 14.719340156 | 15.166587300 | 6.000387266  |
| O  | 11.919861411 | 15.083422663 | 5.857002128  |
| O  | 9.051351322  | 14.939974287 | 5.838098013  |
| O  | 14.952392527 | 10.970810279 | 5.918215068  |
| O  | 7.697310319  | 9.196539842  | 12.711137499 |
| H  | 7.756599337  | 8.490443527  | 13.376372787 |
| H  | 14.653184240 | 11.740851392 | 12.161245420 |
| O  | 13.325605228 | 9.028469927  | 12.787446502 |
| O  | 10.515176683 | 9.026614204  | 12.739143949 |
| O  | -0.626588626 | 9.030773021  | 12.794002928 |
| H  | -0.585075727 | 9.782527409  | 13.403039169 |
| O  | 2.415738658  | 13.234038365 | 12.649547043 |
| O  | 10.587673255 | 13.312995096 | 12.649757824 |
| H  | 7.486487600  | 14.962325512 | 11.323358970 |
| H  | 13.499171202 | 14.999460647 | 11.543297428 |
| H  | 3.346767728  | 14.593407697 | 11.774509904 |
| H  | 11.528035782 | 14.706834075 | 12.035685760 |
| O  | 1.873578070  | 5.002850615  | 12.791895686 |
| H  | 7.555840279  | 6.948793321  | 11.452750062 |
| H  | 4.144238617  | 6.556362936  | 11.086650291 |
| H  | 15.966412167 | 6.952007676  | 11.498606436 |
| O  | 7.701793124  | 0.967786776  | 12.638063048 |
| H  | 7.781524903  | 0.324921177  | 13.355524428 |
| O  | -0.697734474 | 0.887164133  | 12.713072894 |
| H  | -0.616916864 | 0.112121776  | 13.289175437 |
| H  | 6.342350822  | 3.459594610  | 12.076463599 |
| O  | 4.901434532  | 0.817251314  | 12.641441096 |
| O  | 2.097988818  | 0.882191185  | 12.563706824 |
| H  | 14.799972443 | 3.591397996  | 12.126013452 |
| O  | 13.259289040 | 0.892677509  | 12.786908977 |
| O  | 10.439731944 | 0.963702358  | 12.641275857 |
| O  | 2.171447121  | 9.113945250  | 12.641154189 |
| O  | 4.913659775  | 8.942803960  | 12.697633949 |
| H  | 2.170389704  | 8.324164032  | 13.203393968 |
| H  | 4.860170687  | 9.669503951  | 13.335686132 |
| H  | 13.185721382 | 8.206301990  | 13.302830468 |
| H  | 10.547142667 | 9.664390307  | 13.469489678 |
| H  | 13.246671044 | 1.628036496  | 13.416687440 |
| H  | 10.381575069 | 1.715484236  | 13.250402642 |
| H  | 2.093731555  | 1.623830631  | 13.188897202 |
| H  | 4.807933009  | -0.009237409 | 13.139031381 |

|   |              |              |              |
|---|--------------|--------------|--------------|
| H | 9.449789751  | 14.746076037 | 11.981272866 |
| H | 10.666163757 | 13.055616298 | 13.578143270 |
| H | 1.715972519  | 13.909899916 | 12.690991530 |
| H | 0.063663732  | 14.625122011 | 10.933504069 |
| H | 1.071672020  | 6.576928180  | 12.006644904 |
| H | 2.696195620  | 5.433988173  | 13.071574775 |
| H | 6.299810826  | 11.675821391 | 12.040723498 |
| W | 10.534953614 | 6.669365298  | 12.937338652 |
| O | 10.517355900 | 4.924281725  | 12.726384888 |
| O | 9.201718413  | 7.259854470  | 11.447929864 |
| H | 12.087246167 | 7.022942850  | 13.538598663 |
| C | 8.768663566  | 6.946501261  | 14.241618905 |
| H | 8.685770296  | 7.994992906  | 14.571392409 |
| C | 10.786219847 | 6.511914964  | 15.135172166 |
| C | 9.309254795  | 6.183144342  | 15.461968272 |
| H | 7.809845140  | 6.594888289  | 13.822747471 |
| H | 10.981832090 | 7.527675660  | 15.521764674 |
| C | 11.875987328 | 5.569163722  | 15.642913603 |
| H | 11.805960015 | 5.439290974  | 16.736430491 |
| H | 11.795672474 | 4.573764244  | 15.183451960 |
| H | 12.880291395 | 5.951896971  | 15.414430136 |
| C | 8.844617619  | 6.762831406  | 16.809420297 |
| H | 7.757955218  | 6.639575126  | 16.939472648 |
| H | 9.344184067  | 6.261145286  | 17.653200970 |
| H | 9.074280269  | 7.837341156  | 16.871158631 |
| C | 8.952308369  | 4.690031067  | 15.433457643 |
| H | 9.209671181  | 4.208876115  | 14.482801588 |
| H | 9.463341938  | 4.147782635  | 16.242304862 |
| H | 7.869610034  | 4.567131392  | 15.585724256 |

**isobutene (2,1) insertion (top path) into 2c species. E: -2343.105615238**

|    |             |             |              |
|----|-------------|-------------|--------------|
| Al | 0.722962413 | 4.903126016 | 8.589608035  |
| Al | 4.869979132 | 6.974302925 | 7.183806401  |
| O  | 3.415743305 | 7.189883419 | 11.203674866 |
| O  | 7.702528193 | 4.851885556 | 9.758706456  |
| O  | 3.396098835 | 6.844888494 | 8.432203519  |
| O  | 7.774258729 | 5.005371239 | 7.117344412  |
| Al | 4.784273199 | 3.070258502 | 10.030983523 |
| Al | 0.663962412 | 0.966572461 | 11.342198162 |
| O  | 7.629601005 | 0.807874667 | 7.280189893  |
| O  | 3.510447222 | 3.061286071 | 8.643532090  |
| O  | 7.572838476 | 1.127176189 | 10.081644858 |
| O  | 3.508247289 | 2.883974031 | 11.348815408 |
| Al | 7.771909694 | 3.023511722 | 9.938327701  |
| Al | 3.511433813 | 0.974398131 | 11.336761969 |
| O  | 4.993033280 | 0.728734085 | 7.213401478  |
| O  | 0.618317406 | 3.070482824 | 8.640521621  |
| O  | 4.996201423 | 1.132968297 | 10.084811462 |
| O  | 0.688351516 | 2.840763940 | 11.284882957 |
| Al | 3.489859702 | 4.895084742 | 8.467888082  |
| Al | 7.735450254 | 7.115632911 | 7.191551796  |
| O  | 0.766051913 | 7.189237264 | 11.287406301 |
| O  | 4.838722451 | 4.930094965 | 9.925817113  |
| O  | 0.773443623 | 6.850779359 | 8.473139431  |
| O  | 4.912666628 | 5.082408333 | 7.268608859  |
| Al | 6.240311078 | 0.943324471 | 8.614546100  |
| Al | 6.286608852 | 0.835353506 | 11.440865736 |
| Al | 6.309576352 | 5.913596017 | 9.883453042  |
| O  | 6.548499730 | 7.034388977 | 11.281454262 |
| O  | 6.325012177 | 7.085313225 | 8.499630879  |
| Al | 2.075707967 | 7.019790675 | 9.904744469  |

|    |              |             |              |
|----|--------------|-------------|--------------|
| Al | 2.093252064  | 6.872548570 | 7.072187516  |
| Al | 2.046552726  | 2.052637713 | 8.573041643  |
| O  | 2.186944014  | 0.954483570 | 7.126862912  |
| O  | 2.102511009  | 0.876247880 | 9.928611647  |
| Al | 2.074059268  | 3.951213001 | 11.382847043 |
| O  | 2.096738795  | 5.088066258 | 9.918423947  |
| O  | 2.038138816  | 5.008847859 | 7.284051381  |
| Al | 6.220700247  | 3.922431690 | 7.191017335  |
| O  | 6.255059764  | 2.852384909 | 8.653400468  |
| O  | 6.300872963  | 2.914077428 | 11.276867520 |
| H  | 1.924650069  | 1.380787318 | 6.296313770  |
| H  | 4.109347800  | 1.140179140 | 7.281729629  |
| H  | 7.336364031  | 1.401146507 | 6.543391555  |
| H  | 6.271633407  | 7.685103949 | 5.306889801  |
| H  | 3.572418899  | 6.206954420 | 5.316506356  |
| H  | 0.614065770  | 7.602386814 | 5.207954099  |
| H  | 5.885221006  | 2.434275476 | 5.405801593  |
| H  | 8.271182831  | 4.719135979 | 6.325348167  |
| O  | 6.317381378  | 6.944645100 | 5.930597758  |
| O  | 3.503297573  | 7.021119809 | 5.843100789  |
| O  | 0.624697847  | 6.947233602 | 5.919031126  |
| O  | 6.606636189  | 2.976184874 | 5.763573673  |
| Al | 9.152503158  | 4.910222053 | 8.567718280  |
| Al | 13.281593068 | 7.051430266 | 7.304818320  |
| O  | 11.672386248 | 7.261286302 | 11.369503877 |
| O  | 16.116372170 | 4.908616013 | 9.837569963  |
| O  | 11.778181879 | 6.931074529 | 8.557885575  |
| O  | 16.115600776 | 5.060330329 | 7.191188273  |
| Al | 13.203752142 | 3.098116032 | 10.112038311 |
| Al | 9.073855344  | 1.032212041 | 11.341655886 |
| O  | 15.977527021 | 0.890034185 | 7.433183063  |
| O  | 11.925015529 | 3.126376395 | 8.737409508  |
| O  | 15.951168451 | 1.130456743 | 10.170770553 |
| O  | 11.915987833 | 2.894362673 | 11.428524873 |
| Al | 16.187635304 | 3.057707686 | 10.028260396 |
| Al | 11.895498132 | 1.017231545 | 11.446262901 |
| O  | 13.249206053 | 0.792097954 | 7.508205542  |
| O  | 9.114743502  | 3.062123531 | 8.639041486  |
| O  | 13.395845208 | 1.150991470 | 10.235847598 |
| O  | 9.051626653  | 2.903186961 | 11.287260843 |
| Al | 11.918615512 | 4.967544592 | 8.574354514  |
| Al | 16.148243250 | 7.131774782 | 7.297042229  |
| O  | 13.240883408 | 4.929488168 | 9.999260820  |
| O  | 9.123784099  | 6.862216305 | 8.484623263  |
| O  | 13.314802271 | 5.167576742 | 7.357481728  |
| Al | 14.637682190 | 0.978421689 | 8.758564072  |
| Al | 14.692533042 | 0.880016159 | 11.574748929 |
| Al | 14.676472990 | 5.945655518 | 10.028590742 |
| O  | 14.957764025 | 7.026003561 | 11.443305706 |
| O  | 14.734565686 | 7.116183466 | 8.637007817  |
| Al | 10.449300313 | 7.087597225 | 9.980374418  |
| Al | 10.522421039 | 6.955198537 | 7.150734634  |
| Al | 10.564142097 | 2.019218461 | 8.559896887  |
| O  | 10.345771500 | 0.875511075 | 7.190846980  |
| O  | 10.514897049 | 0.884610908 | 10.008632666 |
| Al | 10.490496453 | 3.914322808 | 11.292633448 |
| O  | 10.447683109 | 5.157735312 | 9.986592949  |
| O  | 10.513274138 | 5.086278418 | 7.348788962  |
| Al | 14.576936497 | 3.974365067 | 7.343818120  |
| O  | 14.651393333 | 2.898918989 | 8.791705394  |
| O  | 14.723458027 | 2.982569145 | 11.373605299 |

|    |              |              |              |
|----|--------------|--------------|--------------|
| H  | 9.364502370  | 0.992169065  | 7.072690129  |
| H  | 13.378063182 | 1.361998484  | 6.725755322  |
| H  | 15.714293835 | 1.432972693  | 6.659574778  |
| H  | 14.644593295 | 7.782103835  | 5.466315108  |
| H  | 12.047287485 | 6.228832457  | 5.484653706  |
| H  | 9.088276214  | 6.661733769  | 5.102268569  |
| H  | 14.362806144 | 3.114589186  | 5.119745319  |
| H  | 16.601771951 | 4.891117451  | 6.357324767  |
| O  | 14.722565622 | 7.026019732  | 6.067032933  |
| O  | 11.939908027 | 7.082963011  | 5.938083435  |
| O  | 9.111340003  | 7.174712857  | 5.920934046  |
| O  | 14.646317078 | 2.832424544  | 6.000203131  |
| Al | 0.733929083  | 12.988396441 | 8.557187699  |
| Al | 4.869857322  | 14.988376789 | 7.071371664  |
| O  | 3.505324982  | 15.251942083 | 11.052613939 |
| O  | 7.693727916  | 12.980334236 | 9.755918676  |
| O  | 3.408471748  | 14.866529372 | 8.322251567  |
| O  | 7.723006119  | 12.994911876 | 7.051280148  |
| Al | 4.793438728  | 11.112682663 | 9.973839126  |
| Al | 0.724297691  | 9.148894311  | 11.446431605 |
| O  | 7.636369411  | 8.940267886  | 7.368948758  |
| O  | 3.503153736  | 11.047074095 | 8.563935148  |
| O  | 7.625709979  | 9.269721846  | 10.162379432 |
| O  | 3.518449168  | 10.925375838 | 11.271415885 |
| Al | 7.782720426  | 11.169339777 | 10.013768478 |
| Al | 3.548657437  | 9.063026913  | 11.371494776 |
| O  | 4.991021427  | 8.862076210  | 7.348190181  |
| O  | 0.616294371  | 11.172074244 | 8.712349166  |
| O  | 5.056601156  | 9.189989488  | 10.150415392 |
| O  | 0.711041109  | 11.044495884 | 11.372548150 |
| Al | 3.494722672  | 12.908722637 | 8.369510113  |
| Al | 7.700473025  | 15.088230345 | 7.137999631  |
| O  | 0.794546184  | 15.238601254 | 11.129317003 |
| O  | 4.825293433  | 12.916593726 | 9.767278029  |
| O  | 0.776688029  | 14.921801706 | 8.381912488  |
| O  | 4.899399813  | 13.076255512 | 7.122356065  |
| Al | 6.319454601  | 9.031472859  | 8.693096480  |
| Al | 6.328981135  | 8.976315807  | 11.511008142 |
| Al | 6.217487252  | 13.971861491 | 9.855681333  |
| O  | 6.481164861  | 15.028521913 | 11.284939993 |
| O  | 6.301665928  | 15.109628323 | 8.445555265  |
| Al | 2.161894285  | 15.086622854 | 9.809347318  |
| Al | 2.094464635  | 14.916944696 | 6.983553892  |
| Al | 1.992938104  | 10.091126244 | 8.602359809  |
| O  | 2.109809277  | 8.951951291  | 7.192545766  |
| O  | 2.043945137  | 8.950626926  | 10.005535779 |
| Al | 2.170752722  | 12.078460770 | 11.356451479 |
| O  | 2.105804515  | 13.154490537 | 9.836538418  |
| O  | 2.024375416  | 13.058023624 | 7.206811376  |
| Al | 6.203367325  | 11.910895721 | 7.186091644  |
| O  | 6.274507832  | 10.918649498 | 8.698965851  |
| O  | 6.302438634  | 11.066753476 | 11.286547281 |
| H  | 2.346511986  | 9.362343834  | 6.346002799  |
| H  | 4.168323564  | 9.331460481  | 7.579382907  |
| H  | 7.395928243  | 9.554441993  | 6.633082369  |
| H  | 6.348220059  | 14.257221136 | 5.256730436  |
| H  | 3.515570100  | 14.173732291 | 5.261078456  |
| H  | 0.570708476  | 15.657033863 | 5.078943320  |
| H  | 5.721095250  | 10.273949127 | 5.660625187  |
| H  | 8.283298823  | 12.770602417 | 6.279475939  |
| O  | 6.317583700  | 15.019882843 | 5.851819108  |

|    |              |              |              |
|----|--------------|--------------|--------------|
| O  | 3.492849924  | 15.011420664 | 5.753412205  |
| O  | 0.618790807  | 15.083924107 | 5.854831449  |
| O  | 6.464690096  | 10.893038736 | 5.768363029  |
| Al | 9.139341969  | 12.967453302 | 8.538291421  |
| Al | 13.255778600 | 15.072869442 | 7.221231407  |
| O  | 11.839499475 | 15.260042402 | 11.276096307 |
| O  | 16.133823560 | 13.067210660 | 9.902956069  |
| O  | 11.776271636 | 14.918651405 | 8.468791851  |
| O  | 16.129697561 | 13.078411033 | 7.183256272  |
| Al | 13.224799207 | 11.156105355 | 10.113540941 |
| Al | 9.078622493  | 9.187119117  | 11.431839150 |
| O  | 16.115282686 | 8.947361608  | 7.520986240  |
| O  | 11.936417032 | 11.072988917 | 8.714618596  |
| O  | 16.023795712 | 9.275097001  | 10.252731078 |
| O  | 11.923285386 | 10.966833406 | 11.425514618 |
| Al | 16.207064070 | 11.202271970 | 10.117299318 |
| Al | 11.968526620 | 9.091833501  | 11.440360566 |
| O  | 13.456550832 | 8.929521877  | 7.435318620  |
| O  | 9.042062978  | 11.141879456 | 8.644408622  |
| O  | 13.467700838 | 9.214075582  | 10.248508719 |
| O  | 9.105921774  | 11.048583382 | 11.354918401 |
| Al | 11.911245730 | 12.946261260 | 8.486876847  |
| Al | 16.137907815 | 15.222678871 | 7.235577436  |
| O  | 9.127586943  | 15.249774511 | 11.198873965 |
| O  | 13.234010588 | 12.975790689 | 9.917875893  |
| O  | 9.122942271  | 14.861372007 | 8.394969755  |
| O  | 13.321653439 | 13.154298418 | 7.276203608  |
| Al | 14.752733561 | 9.066069121  | 8.805657213  |
| Al | 14.753683940 | 8.939106234  | 11.624431608 |
| Al | 14.641433508 | 14.019750496 | 9.955302121  |
| O  | 14.495114527 | 15.079685709 | 11.422725373 |
| O  | 14.720534173 | 15.167302501 | 8.568563254  |
| Al | 10.520636006 | 15.095901588 | 9.869746467  |
| Al | 10.495740828 | 14.970547349 | 7.056235406  |
| Al | 10.446380412 | 10.110614149 | 8.653411481  |
| O  | 10.523097159 | 8.960496772  | 7.271791523  |
| O  | 10.452030559 | 9.022183559  | 10.085417373 |
| Al | 10.539070443 | 12.080416192 | 11.366606279 |
| O  | 10.506576605 | 13.167540426 | 9.912355936  |
| O  | 10.504723154 | 13.069641404 | 7.283732514  |
| Al | 14.622642153 | 11.984607514 | 7.312544006  |
| O  | 14.711411058 | 10.979236902 | 8.814881502  |
| O  | 14.719167786 | 11.123178664 | 11.415998030 |
| H  | 9.956448695  | 9.255305775  | 6.538558408  |
| H  | 12.643115401 | 9.450747102  | 7.566777748  |
| H  | 15.952136732 | 9.607475847  | 6.809322045  |
| H  | 14.725138344 | 14.454400962 | 5.344516016  |
| H  | 11.956256189 | 14.230517361 | 5.391106341  |
| H  | 9.047990831  | 15.585089484 | 5.115219519  |
| H  | 14.235859935 | 10.325957884 | 5.782246644  |
| H  | 16.664818833 | 12.828976000 | 6.398908307  |
| O  | 14.719318481 | 15.166509444 | 6.000449029  |
| O  | 11.919830538 | 15.083563056 | 5.857394522  |
| O  | 9.051934693  | 14.940781688 | 5.838475853  |
| O  | 14.952312835 | 10.970676550 | 5.918213630  |
| O  | 7.703846025  | 9.186911284  | 12.724415009 |
| H  | 7.811294327  | 8.454675068  | 13.358286631 |
| H  | 14.653856982 | 11.741043371 | 12.160719534 |
| O  | 13.327696779 | 9.030014572  | 12.789262885 |
| O  | 10.509672052 | 9.024015228  | 12.775556720 |
| O  | -0.626592010 | 9.030838841  | 12.793885231 |

|   |              |              |              |
|---|--------------|--------------|--------------|
| H | -0.584894382 | 9.782577079  | 13.402946625 |
| O | 2.415770484  | 13.233980101 | 12.649478815 |
| O | 10.587532604 | 13.313424040 | 12.651126423 |
| H | 7.487070844  | 14.963449571 | 11.323046840 |
| H | 13.499180983 | 14.998926254 | 11.543156229 |
| H | 3.346745665  | 14.593579118 | 11.774505621 |
| H | 11.528101454 | 14.707011609 | 12.036413429 |
| O | 1.873444065  | 5.002754806  | 12.791864778 |
| H | 7.548594313  | 6.951136024  | 11.452249234 |
| H | 4.142674939  | 6.554394947  | 11.086160944 |
| H | 15.966163073 | 6.952158874  | 11.500578022 |
| O | 7.702233793  | 0.967626547  | 12.638788061 |
| H | 7.780623523  | 0.320742679  | 13.352855894 |
| O | -0.697659611 | 0.887107047  | 12.713008336 |
| H | -0.616486881 | 0.112858665  | 13.290110159 |
| H | 6.344687656  | 3.464743005  | 12.075643105 |
| O | 4.901385258  | 0.817224044  | 12.641434672 |
| O | 2.098038890  | 0.882195468  | 12.563680764 |
| H | 14.800888691 | 3.591334578  | 12.126014544 |
| O | 13.259988237 | 0.892008934  | 12.787332137 |
| O | 10.440095192 | 0.962648394  | 12.641935517 |
| O | 2.171938064  | 9.113817189  | 12.641036261 |
| O | 4.914980224  | 8.941801593  | 12.696131289 |
| H | 2.170476887  | 8.323364433  | 13.202416437 |
| H | 4.860977804  | 9.660606830  | 13.342858362 |
| H | 13.189684864 | 8.204496023  | 13.300545195 |
| H | 10.559326380 | 9.638196741  | 13.524939860 |
| H | 13.247731119 | 1.630759624  | 13.413108308 |
| H | 10.383576937 | 1.709456922  | 13.256920006 |
| H | 2.094174873  | 1.623596432  | 13.189167158 |
| H | 4.808155516  | -0.009272025 | 13.139023622 |
| H | 9.449662826  | 14.745552381 | 11.981255680 |
| H | 10.663870149 | 13.054007045 | 13.579228116 |
| H | 1.715884152  | 13.909696324 | 12.691193626 |
| H | 0.063304524  | 14.625583424 | 10.933548445 |
| H | 1.073784402  | 6.577698654  | 12.006942624 |
| H | 2.697561292  | 5.423396459  | 13.082554395 |
| H | 6.298597940  | 11.676738242 | 12.041045754 |
| W | 10.528477098 | 6.676990783  | 12.960968147 |
| O | 10.593885344 | 4.919674380  | 12.809407507 |
| O | 9.203290426  | 7.263081647  | 11.502504719 |
| H | 12.080953293 | 7.071892830  | 13.504891947 |
| C | 8.691034656  | 6.592370756  | 14.287993718 |
| H | 8.284544029  | 7.572704885  | 14.599256661 |
| C | 10.843760638 | 6.822011550  | 15.176777871 |
| C | 9.528932534  | 6.107006002  | 15.472830736 |
| H | 9.669835240  | 5.016164562  | 15.401087608 |
| C | 12.073362980 | 6.062511108  | 15.683599134 |
| H | 11.995581761 | 5.916624921  | 16.776869885 |
| H | 12.157426742 | 5.068974791  | 15.220780023 |
| H | 13.010654198 | 6.602509830  | 15.483025978 |
| H | 9.096047819  | 6.307950873  | 16.476021264 |
| C | 10.847097788 | 8.242970213  | 15.738642673 |
| H | 10.889697663 | 8.209236341  | 16.842331117 |
| H | 11.723585238 | 8.814878973  | 15.394961069 |
| H | 9.937176053  | 8.802669041  | 15.474769993 |
| C | 7.544566844  | 5.639016768  | 13.937357886 |
| H | 7.936923770  | 4.695721742  | 13.525960187 |
| H | 6.980328220  | 5.384381726  | 14.852329867 |
| H | 6.828054355  | 6.052153315  | 13.220945829 |

**1-butene (2,1) insertion (side path) into 2d species. E: -2336.221788550**

|    |              |             |              |
|----|--------------|-------------|--------------|
| Al | 0.721991828  | 4.903396778 | 8.588025038  |
| Al | 4.868673466  | 6.973526625 | 7.182751472  |
| O  | 3.414083964  | 7.191507492 | 11.203724931 |
| O  | 7.699815594  | 4.852822758 | 9.759706773  |
| O  | 3.391652595  | 6.845860669 | 8.430926740  |
| O  | 7.773161778  | 5.005525028 | 7.117904687  |
| Al | 4.785213473  | 3.070319472 | 10.030768772 |
| Al | 0.665422818  | 0.968493034 | 11.340469999 |
| O  | 7.629404973  | 0.808446478 | 7.279948528  |
| O  | 3.510398716  | 3.061434519 | 8.643742363  |
| O  | 7.574645224  | 1.127508703 | 10.081510883 |
| O  | 3.508680364  | 2.883397342 | 11.349194184 |
| Al | 7.773412909  | 3.022785075 | 9.939541662  |
| Al | 3.512013728  | 0.973006217 | 11.335107832 |
| O  | 4.992398156  | 0.728911854 | 7.212937076  |
| O  | 0.618642758  | 3.070772749 | 8.640272014  |
| O  | 4.995843064  | 1.132504133 | 10.084171551 |
| O  | 0.689050648  | 2.841410608 | 11.284604669 |
| Al | 3.489277198  | 4.895022247 | 8.468407128  |
| Al | 7.734135563  | 7.115475170 | 7.191711890  |
| O  | 0.762960611  | 7.190394025 | 11.286730950 |
| O  | 4.837984661  | 4.930118596 | 9.925662905  |
| O  | 0.771275966  | 6.852567395 | 8.471866595  |
| O  | 4.912080391  | 5.082682409 | 7.268894120  |
| Al | 6.240075119  | 0.944466684 | 8.614062756  |
| Al | 6.287366971  | 0.839648712 | 11.440473985 |
| Al | 6.305889747  | 5.917447163 | 9.886050058  |
| O  | 6.542892501  | 7.038827431 | 11.284946533 |
| O  | 6.323247304  | 7.086251401 | 8.499594835  |
| Al | 2.074586577  | 7.019104997 | 9.904750051  |
| Al | 2.091502081  | 6.871996848 | 7.070895653  |
| Al | 2.046674072  | 2.052605555 | 8.571460220  |
| O  | 2.187312963  | 0.955934013 | 7.125161634  |
| O  | 2.101947554  | 0.875414083 | 9.927212744  |
| Al | 2.075313829  | 3.951710345 | 11.382927969 |
| O  | 2.096105664  | 5.088554587 | 9.918316686  |
| O  | 2.037631320  | 5.008811134 | 7.283867793  |
| Al | 6.220398482  | 3.922605640 | 7.191391534  |
| O  | 6.254644360  | 2.852392759 | 8.653126288  |
| O  | 6.300762702  | 2.911197450 | 11.274342066 |
| H  | 1.918139544  | 1.382034726 | 6.296694511  |
| H  | 4.108528813  | 1.140700882 | 7.278650456  |
| H  | 7.336568214  | 1.402427296 | 6.543517139  |
| H  | 6.270484776  | 7.685717995 | 5.307682014  |
| H  | 3.572782583  | 6.205099144 | 5.317717727  |
| H  | 0.607069459  | 7.585481736 | 5.193595197  |
| H  | 5.884730133  | 2.433432982 | 5.407138787  |
| H  | 8.271023414  | 4.719000892 | 6.326653424  |
| O  | 6.317179742  | 6.944396139 | 5.930283517  |
| O  | 3.502797910  | 7.020454615 | 5.842473762  |
| O  | 0.622564332  | 6.949148927 | 5.921205028  |
| O  | 6.606129777  | 2.976247356 | 5.763637108  |
| Al | 9.150499956  | 4.909108748 | 8.571874930  |
| Al | 13.278324526 | 7.022375823 | 7.293086156  |
| O  | 11.620122004 | 7.259458218 | 11.426233260 |
| O  | 16.117458853 | 4.908823936 | 9.837634425  |
| O  | 11.774198035 | 6.924986056 | 8.561724085  |
| O  | 16.115076556 | 5.061786800 | 7.191307563  |
| Al | 13.203038368 | 3.105197439 | 10.115746323 |
| Al | 9.074910884  | 1.034275426 | 11.342432053 |

|    |              |              |              |
|----|--------------|--------------|--------------|
| O  | 15.977955547 | 0.891983751  | 7.429656180  |
| O  | 11.925205284 | 3.127875642  | 8.738295834  |
| O  | 15.952938478 | 1.131675976  | 10.168209022 |
| O  | 11.914839034 | 2.900207203  | 11.433972314 |
| Al | 16.187880579 | 3.058393078  | 10.027780885 |
| Al | 11.896417338 | 1.024698246  | 11.447269223 |
| O  | 13.248419638 | 0.794505234  | 7.507237974  |
| O  | 9.113412646  | 3.062398964  | 8.639117089  |
| O  | 13.395297885 | 1.189232712  | 10.234919023 |
| O  | 9.057148598  | 2.904087313  | 11.287066559 |
| Al | 11.915376498 | 4.963312327  | 8.579645690  |
| Al | 16.140982602 | 7.138351167  | 7.300793258  |
| O  | 13.240168795 | 4.932042421  | 10.000213140 |
| O  | 9.123165013  | 6.861374378  | 8.482312849  |
| O  | 13.314253127 | 5.160071385  | 7.358608586  |
| Al | 14.638629527 | 0.983624152  | 8.754578546  |
| Al | 14.694218126 | 0.883264317  | 11.566523638 |
| Al | 14.678247872 | 5.943763038  | 10.028183462 |
| O  | 14.954921703 | 7.024507491  | 11.443085336 |
| O  | 14.727718196 | 7.110030063  | 8.637341072  |
| Al | 10.455091238 | 7.087256444  | 9.975986990  |
| Al | 10.517970426 | 6.945905298  | 7.151773578  |
| Al | 10.563962442 | 2.021962374  | 8.562523257  |
| O  | 10.346227157 | 0.877045545  | 7.191877144  |
| O  | 10.515235814 | 0.885591949  | 10.009125639 |
| Al | 10.492001432 | 3.924059829  | 11.320567541 |
| O  | 10.446950865 | 5.156377288  | 9.995949627  |
| O  | 10.511350586 | 5.082211365  | 7.352849744  |
| Al | 14.581256874 | 3.972212686  | 7.343186558  |
| O  | 14.653718964 | 2.901454542  | 8.790296084  |
| O  | 14.726323927 | 2.986066567  | 11.376057190 |
| H  | 9.365039391  | 0.994375888  | 7.073772672  |
| H  | 13.373268694 | 1.366824456  | 6.725944142  |
| H  | 15.717518729 | 1.439165185  | 6.657997811  |
| H  | 14.635844887 | 7.784205965  | 5.471894705  |
| H  | 12.018114064 | 6.146487242  | 5.517093289  |
| H  | 9.090140966  | 6.670560314  | 5.097653555  |
| H  | 14.370016126 | 3.116435846  | 5.116997016  |
| H  | 16.600625600 | 4.899386425  | 6.355771747  |
| O  | 14.721944317 | 7.021176141  | 6.062390137  |
| O  | 11.929556957 | 7.022135492  | 5.931819743  |
| O  | 9.110852114  | 7.175231469  | 5.921455283  |
| O  | 14.646428104 | 2.832192745  | 5.999002274  |
| Al | 0.730700113  | 12.978550686 | 8.529967166  |
| Al | 4.869908026  | 14.989197874 | 7.071659633  |
| O  | 3.503813835  | 15.251118811 | 11.050228146 |
| O  | 7.687585968  | 12.981920804 | 9.753735951  |
| O  | 3.405767981  | 14.865620117 | 8.320142492  |
| O  | 7.722229816  | 12.995147641 | 7.051057109  |
| Al | 4.789628800  | 11.113391457 | 9.974861747  |
| Al | 0.713444379  | 9.149775505  | 11.442593911 |
| O  | 7.635633053  | 8.940895106  | 7.369488306  |
| O  | 3.501835797  | 11.047215666 | 8.564431889  |
| O  | 7.619841567  | 9.272064202  | 10.157536465 |
| O  | 3.514722103  | 10.926186008 | 11.271762014 |
| Al | 7.775058267  | 11.174800737 | 10.009647896 |
| Al | 3.544557747  | 9.063613382  | 11.374312215 |
| O  | 4.989844872  | 8.860464735  | 7.345960674  |
| O  | 0.609699918  | 11.154756596 | 8.701522185  |
| O  | 5.053578923  | 9.190234195  | 10.151498771 |
| O  | 0.702353624  | 11.045058841 | 11.363377758 |



|    |              |              |              |
|----|--------------|--------------|--------------|
| Al | 3.494439582  | 12.908662951 | 8.369223803  |
| Al | 7.700077899  | 15.089524441 | 7.137651419  |
| O  | 0.792354302  | 15.238584165 | 11.124928786 |
| O  | 4.823442063  | 12.917607707 | 9.767822474  |
| O  | 0.776152366  | 14.918761360 | 8.347720453  |
| O  | 4.898934016  | 13.077135260 | 7.122225232  |
| Al | 6.313504978  | 9.032245120  | 8.690925266  |
| Al | 6.322957083  | 8.974774760  | 11.511822284 |
| Al | 6.213518196  | 13.975536712 | 9.856151689  |
| O  | 6.480995867  | 15.032260368 | 11.284744762 |
| O  | 6.300514161  | 15.111298714 | 8.444637455  |
| Al | 2.159864910  | 15.084056372 | 9.802821988  |
| Al | 2.094496152  | 14.913838142 | 6.974218004  |
| Al | 1.996347955  | 10.088099510 | 8.602624458  |
| O  | 2.107795587  | 8.951364344  | 7.193103237  |
| O  | 2.038129238  | 8.950413598  | 10.005604791 |
| Al | 2.164616754  | 12.078850854 | 11.351817289 |
| O  | 2.101073689  | 13.153770494 | 9.831025948  |
| O  | 2.028426891  | 13.052239390 | 7.201951381  |
| Al | 6.201901828  | 11.911863672 | 7.184893490  |
| O  | 6.260400945  | 10.918940005 | 8.697499971  |
| O  | 6.300310672  | 11.067501675 | 11.285873349 |
| H  | 2.292811802  | 9.369213101  | 6.337521563  |
| H  | 4.163600503  | 9.329991646  | 7.563465189  |
| H  | 7.396333006  | 9.554412837  | 6.632779067  |
| H  | 6.349121876  | 14.256735836 | 5.257264571  |
| H  | 3.522082899  | 14.174016198 | 5.258065249  |
| H  | 0.580053067  | 15.643060366 | 5.055189262  |
| H  | 5.721515639  | 10.273526870 | 5.660138634  |
| H  | 8.284211726  | 12.770404538 | 6.280602295  |
| O  | 6.317417454  | 15.019989688 | 5.851515649  |
| O  | 3.494388798  | 15.010918370 | 5.751493752  |
| O  | 0.620788182  | 15.086132468 | 5.843141895  |
| O  | 6.464644803  | 10.893152623 | 5.768130301  |
| Al | 9.138077694  | 12.970641552 | 8.538425716  |
| Al | 13.256261889 | 15.076950181 | 7.216537241  |
| O  | 11.841205319 | 15.265293680 | 11.273960301 |
| O  | 16.128520820 | 13.060738906 | 9.839250347  |
| O  | 11.775890285 | 14.921169081 | 8.467947734  |
| O  | 16.127575035 | 13.073911018 | 7.128873042  |
| Al | 13.203574300 | 11.159337312 | 10.106306209 |
| Al | 9.062146270  | 9.193497339  | 11.400817478 |
| O  | 16.051431960 | 8.949110343  | 7.517508377  |
| O  | 11.920806476 | 11.108587796 | 8.716233755  |
| O  | 15.981459192 | 9.274296432  | 10.246999954 |
| O  | 11.917554782 | 10.969966956 | 11.430750664 |
| Al | 16.194300955 | 11.193062078 | 10.095104115 |
| Al | 11.944216570 | 9.092297133  | 11.455315946 |
| O  | 13.400824155 | 8.880968312  | 7.433831805  |
| O  | 9.038679739  | 11.143431916 | 8.643482321  |
| O  | 13.420113256 | 9.207462427  | 10.249638633 |
| O  | 9.100387274  | 11.052998217 | 11.348383931 |
| Al | 11.908587469 | 12.960731501 | 8.487023138  |
| Al | 16.137588138 | 15.226219368 | 7.218311956  |
| O  | 9.126956997  | 15.251094898 | 11.199750991 |
| O  | 13.228711203 | 12.980172818 | 9.917788535  |
| O  | 9.121669260  | 14.864397178 | 8.394487356  |
| O  | 13.321045367 | 13.158983749 | 7.274785557  |
| Al | 14.697048199 | 9.059333473  | 8.801265124  |
| Al | 14.735311910 | 8.932488403  | 11.618502810 |
| Al | 14.639741886 | 14.011661987 | 9.922738886  |

|    |              |              |              |
|----|--------------|--------------|--------------|
| O  | 14.492348254 | 15.087508303 | 11.364922124 |
| O  | 14.720873372 | 15.170964705 | 8.558244031  |
| Al | 10.517924389 | 15.100277890 | 9.870079341  |
| Al | 10.494175373 | 14.973515104 | 7.055130518  |
| Al | 10.448749617 | 10.120731704 | 8.652238926  |
| O  | 10.527673097 | 8.961784642  | 7.270765328  |
| O  | 10.453875237 | 9.023417879  | 10.078227706 |
| Al | 10.534218817 | 12.085347916 | 11.363550808 |
| O  | 10.501192915 | 13.178227961 | 9.913052535  |
| O  | 10.502170458 | 13.072968843 | 7.282539813  |
| Al | 14.616517360 | 11.986072777 | 7.303440939  |
| O  | 14.659656948 | 10.973418588 | 8.802956563  |
| O  | 14.713848778 | 11.129931602 | 11.375826296 |
| H  | 9.961411605  | 9.255637993  | 6.536491202  |
| H  | 12.564023199 | 9.371722447  | 7.510215697  |
| H  | 15.905584729 | 9.613106653  | 6.805313843  |
| H  | 14.721454079 | 14.457240446 | 5.338495684  |
| H  | 11.953993909 | 14.229794548 | 5.392350946  |
| H  | 9.045486818  | 15.587074272 | 5.114945474  |
| H  | 14.220054496 | 10.341685716 | 5.749492722  |
| H  | 16.653281963 | 12.824276662 | 6.340317230  |
| O  | 14.717220309 | 15.168283565 | 5.995293711  |
| O  | 11.919016845 | 15.084590439 | 5.855543901  |
| O  | 9.051162685  | 14.942100422 | 5.837633627  |
| O  | 14.947375466 | 10.966504290 | 5.914035258  |
| O  | 7.702521652  | 9.192620140  | 12.718110551 |
| H  | 7.806350013  | 8.452552664  | 13.343439205 |
| H  | 14.644007816 | 11.747089036 | 12.121158803 |
| O  | 13.318697653 | 9.027081382  | 12.791438435 |
| O  | 10.445778800 | 9.034596044  | 12.738071942 |
| O  | -0.633455262 | 9.031237347  | 12.788464301 |
| H  | -0.592421239 | 9.782537724  | 13.398260478 |
| O  | 2.414418674  | 13.232728458 | 12.647396141 |
| O  | 10.586952023 | 13.314467926 | 12.651194236 |
| H  | 7.486968364  | 14.966299100 | 11.321993191 |
| H  | 13.496198531 | 15.002003055 | 11.493718587 |
| H  | 3.346235597  | 14.591963789 | 11.771471577 |
| H  | 11.535608614 | 14.710954697 | 12.035364461 |
| O  | 1.873866197  | 5.002299820  | 12.792287693 |
| H  | 7.545235669  | 6.962692094  | 11.443552140 |
| H  | 4.140332162  | 6.553611015  | 11.096090754 |
| H  | 15.963777260 | 6.955311784  | 11.499797665 |
| O  | 7.702666957  | 0.968547768  | 12.639488877 |
| H  | 7.780259105  | 0.316880754  | 13.349326877 |
| O  | -0.698152322 | 0.886170428  | 12.710331945 |
| H  | -0.616391890 | 0.115283362  | 13.291630976 |
| H  | 6.343462730  | 3.461928659  | 12.073402143 |
| O  | 4.901350984  | 0.817074874  | 12.641303220 |
| O  | 2.098053540  | 0.881619789  | 12.562934152 |
| H  | 14.817286529 | 3.593110704  | 12.128380235 |
| O  | 13.267600294 | 0.889939724  | 12.782977054 |
| O  | 10.440967918 | 0.962685728  | 12.642539022 |
| O  | 2.166589663  | 9.114630453  | 12.639837791 |
| O  | 4.912209999  | 8.944068452  | 12.700926222 |
| H  | 2.162970965  | 8.324827955  | 13.202144347 |
| H  | 4.858449234  | 9.667011981  | 13.343130148 |
| H  | 13.180365847 | 8.217867809  | 13.325133144 |
| H  | 10.442962281 | 9.661218063  | 13.478579912 |
| H  | 13.262569146 | 1.627745054  | 13.410110425 |
| H  | 10.383812973 | 1.705796159  | 13.261926227 |
| H  | 2.094962036  | 1.623549941  | 13.187781883 |

|   |              |              |              |
|---|--------------|--------------|--------------|
| H | 4.810415858  | -0.010754399 | 13.137079644 |
| H | 9.450797339  | 14.747690114 | 11.981980214 |
| H | 10.681608654 | 13.053515747 | 13.577094059 |
| H | 1.715542884  | 13.909293696 | 12.691137262 |
| H | 0.049839640  | 14.642920714 | 10.923812133 |
| H | 1.073558304  | 6.583358579  | 12.008829726 |
| H | 2.701307550  | 5.399337479  | 13.105744112 |
| H | 6.299370871  | 11.677973542 | 12.039960260 |
| W | 10.418567931 | 6.671389848  | 12.958595873 |
| O | 10.595322376 | 4.916210683  | 12.871037182 |
| O | 9.184553014  | 7.260638632  | 11.444400775 |
| H | 11.924923747 | 7.094637392  | 13.640196516 |
| C | 8.462630386  | 6.335146038  | 14.058575403 |
| H | 7.790609673  | 7.202192777  | 14.190205134 |
| C | 10.351758106 | 7.071554630  | 15.130091999 |
| C | 9.178583878  | 6.143788995  | 15.405132467 |
| H | 9.528171336  | 5.102846174  | 15.491763889 |
| H | 8.580441658  | 6.359676242  | 16.310955375 |
| H | 11.276649148 | 6.897367627  | 15.695044587 |
| H | 10.057160831 | 8.122779351  | 15.282748876 |
| C | 7.615880123  | 5.154225169  | 13.567058702 |
| H | 7.583377692  | 5.135830374  | 12.468536372 |
| H | 8.130798550  | 4.222346465  | 13.850555420 |
| C | 6.184429921  | 5.162922036  | 14.122369030 |
| H | 5.639146501  | 6.044634035  | 13.754922703 |
| H | 6.187981199  | 5.193478533  | 15.221831484 |
| H | 5.608713170  | 4.267505676  | 13.831560406 |

**isobutene (2,1) insertion (top path) into 2d species. E: -2336.222459485**

|    |             |             |              |
|----|-------------|-------------|--------------|
| Al | 0.723144568 | 4.903230914 | 8.589570348  |
| Al | 4.871258782 | 6.973779704 | 7.185838232  |
| O  | 3.415473839 | 7.189929411 | 11.204141852 |
| O  | 7.705816581 | 4.851264863 | 9.754508152  |
| O  | 3.396681102 | 6.844917039 | 8.433592558  |
| O  | 7.771838663 | 5.004721122 | 7.113410073  |
| Al | 4.783589062 | 3.070121653 | 10.030441164 |
| Al | 0.663762381 | 0.966398643 | 11.342117555 |
| O  | 7.629618284 | 0.807646895 | 7.279924291  |
| O  | 3.510326491 | 3.061373144 | 8.643478990  |
| O  | 7.570789001 | 1.126174451 | 10.080080740 |
| O  | 3.508180546 | 2.884017256 | 11.348923071 |
| Al | 7.771539618 | 3.024023213 | 9.933656358  |
| Al | 3.511175096 | 0.974383439 | 11.336575448 |
| O  | 4.992866384 | 0.728550719 | 7.213064492  |
| O  | 0.618321814 | 3.070496709 | 8.640592871  |
| O  | 4.995391310 | 1.132573589 | 10.084564270 |
| O  | 0.688367868 | 2.840697546 | 11.285025925 |
| Al | 3.490170388 | 4.895616362 | 8.468907923  |
| Al | 7.738578266 | 7.120016894 | 7.192194239  |
| O  | 0.765816152 | 7.189314592 | 11.287212499 |
| O  | 4.839664745 | 4.929911367 | 9.925706706  |
| O  | 0.773844747 | 6.850927702 | 8.473225353  |
| O  | 4.912071772 | 5.082503212 | 7.268499531  |
| Al | 6.239917986 | 0.941858596 | 8.614482365  |
| Al | 6.286247802 | 0.833715137 | 11.439693019 |
| Al | 6.313248329 | 5.913000556 | 9.888832736  |
| O  | 6.551251015 | 7.026035126 | 11.293836375 |
| O  | 6.326933054 | 7.085649140 | 8.502929041  |
| Al | 2.076079001 | 7.020067427 | 9.904958739  |
| Al | 2.094331933 | 6.872646570 | 7.072428646  |
| Al | 2.046441607 | 2.052611006 | 8.572973581  |

|    |              |             |              |
|----|--------------|-------------|--------------|
| O  | 2.186979033  | 0.954605072 | 7.126763237  |
| O  | 2.102466641  | 0.876334071 | 9.928641026  |
| Al | 2.073816109  | 3.951314671 | 11.382733518 |
| O  | 2.096754158  | 5.088069382 | 9.918486276  |
| O  | 2.038577259  | 5.008999787 | 7.284295607  |
| Al | 6.217792215  | 3.921205245 | 7.191254297  |
| O  | 6.254261589  | 2.850554201 | 8.652395365  |
| O  | 6.300241123  | 2.913103889 | 11.275446955 |
| H  | 1.924251382  | 1.380887408 | 6.296330705  |
| H  | 4.109124134  | 1.139836943 | 7.281639171  |
| H  | 7.335900268  | 1.400648455 | 6.543132805  |
| H  | 6.270475662  | 7.685879612 | 5.308803305  |
| H  | 3.572940461  | 6.206191339 | 5.317995606  |
| H  | 0.614663650  | 7.601695035 | 5.207329330  |
| H  | 5.885165290  | 2.434490363 | 5.404013629  |
| H  | 8.259935282  | 4.724184647 | 6.313497191  |
| O  | 6.318599894  | 6.945017637 | 5.931903560  |
| O  | 3.503849740  | 7.021076355 | 5.843512931  |
| O  | 0.625721327  | 6.947182409 | 5.918966977  |
| O  | 6.605879249  | 2.976164978 | 5.763517988  |
| Al | 9.153191144  | 4.909586688 | 8.538166644  |
| Al | 13.292034117 | 7.054101187 | 7.309722286  |
| O  | 11.676324033 | 7.258316716 | 11.364332584 |
| O  | 16.116385482 | 4.908552351 | 9.837504105  |
| O  | 11.779739923 | 6.930085791 | 8.548887185  |
| O  | 16.116478218 | 5.060301665 | 7.191204410  |
| Al | 13.204013601 | 3.100311670 | 10.109783082 |
| Al | 9.072621021  | 1.031845739 | 11.339753905 |
| O  | 15.977455978 | 0.890036441 | 7.433108073  |
| O  | 11.923694030 | 3.124759992 | 8.732337005  |
| O  | 15.951210884 | 1.130509859 | 10.170737446 |
| O  | 11.913454551 | 2.896213494 | 11.424046190 |
| Al | 16.187652311 | 3.057794651 | 10.028442189 |
| Al | 11.894957633 | 1.018243443 | 11.445531531 |
| O  | 13.249091959 | 0.792115371 | 7.508082967  |
| O  | 9.116723115  | 3.061466508 | 8.635127990  |
| O  | 13.395799322 | 1.151967043 | 10.235477998 |
| O  | 9.047243736  | 2.899539386 | 11.281008775 |
| Al | 11.913034280 | 4.964476600 | 8.553118590  |
| Al | 16.151044870 | 7.132989256 | 7.296377273  |
| O  | 13.239381563 | 4.929600061 | 9.997311739  |
| O  | 9.127891773  | 6.861409906 | 8.474210838  |
| O  | 13.317558687 | 5.166879629 | 7.356564858  |
| Al | 14.637720621 | 0.978422217 | 8.758640372  |
| Al | 14.692183299 | 0.881174634 | 11.574726221 |
| Al | 14.675036509 | 5.944180198 | 10.028774744 |
| O  | 14.957820446 | 7.025591972 | 11.443026406 |
| O  | 14.735967801 | 7.116965374 | 8.637657584  |
| Al | 10.448355668 | 7.090119967 | 9.957684786  |
| Al | 10.534197556 | 6.956322569 | 7.127816224  |
| Al | 10.564678346 | 2.014717111 | 8.554990252  |
| O  | 10.344107908 | 0.872686803 | 7.188290202  |
| O  | 10.514934748 | 0.884435892 | 10.006957887 |
| Al | 10.483838663 | 3.907564302 | 11.243824336 |
| O  | 10.453898956 | 5.152253467 | 9.930480557  |
| O  | 10.513898368 | 5.087306039 | 7.294269595  |
| Al | 14.579386670 | 3.973857453 | 7.343595833  |
| O  | 14.651553302 | 2.898736871 | 8.791472950  |
| O  | 14.723317464 | 2.982628734 | 11.373618994 |
| H  | 9.362596411  | 0.989601643 | 7.070854902  |
| H  | 13.378448024 | 1.362061592 | 6.725710207  |

|    |              |              |              |
|----|--------------|--------------|--------------|
| H  | 15.714097700 | 1.432599459  | 6.659266766  |
| H  | 14.643202076 | 7.780671538  | 5.466569993  |
| H  | 12.088085079 | 6.236593445  | 5.477790442  |
| H  | 9.083202962  | 6.664426554  | 5.096562826  |
| H  | 14.360976089 | 3.114256785  | 5.120202008  |
| H  | 16.602749472 | 4.891917908  | 6.357222683  |
| O  | 14.726792621 | 7.026030600  | 6.068193341  |
| O  | 11.981688560 | 7.090361774  | 5.932101307  |
| O  | 9.112409724  | 7.176507708  | 5.915738669  |
| O  | 14.646482426 | 2.832092010  | 6.000014146  |
| Al | 0.733854739  | 12.989408936 | 8.557266032  |
| Al | 4.869510762  | 14.988207786 | 7.070778449  |
| O  | 3.505296366  | 15.251984117 | 11.052781665 |
| O  | 7.693111379  | 12.980462032 | 9.755228468  |
| O  | 3.408235486  | 14.867005968 | 8.322212959  |
| O  | 7.722465886  | 12.994670372 | 7.051072604  |
| Al | 4.792808423  | 11.113270021 | 9.974586971  |
| Al | 0.724414841  | 9.148995633  | 11.446616461 |
| O  | 7.636000011  | 8.942663666  | 7.368252691  |
| O  | 3.502500525  | 11.047160531 | 8.564077463  |
| O  | 7.622891141  | 9.270335244  | 10.158273096 |
| O  | 3.518049238  | 10.925626789 | 11.271658868 |
| Al | 7.780468063  | 11.170425485 | 10.013843763 |
| Al | 3.548598249  | 9.063197147  | 11.372206027 |
| O  | 4.990841657  | 8.861311005  | 7.348003846  |
| O  | 0.616360232  | 11.174100223 | 8.712615601  |
| O  | 5.056067423  | 9.188902546  | 10.150932014 |
| O  | 0.711089638  | 11.044650274 | 11.372822986 |
| Al | 3.494428160  | 12.908659784 | 8.369684185  |
| Al | 7.700233348  | 15.087641929 | 7.137471409  |
| O  | 0.794617765  | 15.238611458 | 11.129311959 |
| O  | 4.824458019  | 12.917227696 | 9.767291676  |
| O  | 0.776594999  | 14.921967166 | 8.381927217  |
| O  | 4.898797072  | 13.076652658 | 7.122154012  |
| Al | 6.318031971  | 9.032118166  | 8.692784718  |
| Al | 6.327541780  | 8.971364275  | 11.510740650 |
| Al | 6.216719109  | 13.971547429 | 9.854966273  |
| O  | 6.480856213  | 15.027476204 | 11.284748994 |
| O  | 6.301373315  | 15.108880311 | 8.444181051  |
| Al | 2.162119550  | 15.086715442 | 9.809344958  |
| Al | 2.094399067  | 14.917144903 | 6.983516463  |
| Al | 1.992363706  | 10.091748788 | 8.602472765  |
| O  | 2.109801255  | 8.952004502  | 7.192772222  |
| O  | 2.043428672  | 8.950817405  | 10.005587810 |
| Al | 2.170730767  | 12.078744027 | 11.356455311 |
| O  | 2.105742351  | 13.154795203 | 9.836611255  |
| O  | 2.024324147  | 13.058360925 | 7.206772397  |
| Al | 6.201903466  | 11.911125519 | 7.185469117  |
| O  | 6.266455758  | 10.919270214 | 8.697799490  |
| O  | 6.301280217  | 11.068298306 | 11.284670385 |
| H  | 2.346751478  | 9.362335751  | 6.346263756  |
| H  | 4.167951052  | 9.330311485  | 7.579385087  |
| H  | 7.393931087  | 9.556217806  | 6.632216481  |
| H  | 6.348096779  | 14.257663732 | 5.255614382  |
| H  | 3.515051686  | 14.173630550 | 5.261157834  |
| H  | 0.570671388  | 15.657208221 | 5.078955158  |
| H  | 5.720526684  | 10.274911849 | 5.658843248  |
| H  | 8.282357937  | 12.770027199 | 6.279102699  |
| O  | 6.317427241  | 15.019780231 | 5.851373302  |
| O  | 3.492610392  | 15.011500003 | 5.753205810  |
| O  | 0.618782644  | 15.083987491 | 5.854764822  |

|    |              |              |              |
|----|--------------|--------------|--------------|
| O  | 6.464600563  | 10.893147485 | 5.768033411  |
| Al | 9.139128917  | 12.967387737 | 8.538078548  |
| Al | 13.255942508 | 15.072882496 | 7.220848131  |
| O  | 11.839373481 | 15.260470864 | 11.275834957 |
| O  | 16.133916188 | 13.067858907 | 9.903602974  |
| O  | 11.776203964 | 14.918747619 | 8.468358972  |
| O  | 16.129674413 | 13.078669081 | 7.183238721  |
| Al | 13.226593828 | 11.159005599 | 10.112927310 |
| Al | 9.074990735  | 9.181878355  | 11.412945221 |
| O  | 16.116813698 | 8.948143799  | 7.521159577  |
| O  | 11.939070208 | 11.075675250 | 8.712718780  |
| O  | 16.024178499 | 9.275351019  | 10.253057551 |
| O  | 11.924656249 | 10.968822648 | 11.422704177 |
| Al | 16.207554312 | 11.203459868 | 10.118067878 |
| Al | 11.970607059 | 9.094571286  | 11.427839222 |
| O  | 13.462391248 | 8.935474258  | 7.436721916  |
| O  | 9.041731450  | 11.141750488 | 8.643760485  |
| O  | 13.469005541 | 9.214011303  | 10.247217280 |
| O  | 9.105622628  | 11.047742044 | 11.352569321 |
| Al | 11.911826193 | 12.947647339 | 8.486568092  |
| Al | 16.137889328 | 15.222673604 | 7.235502005  |
| O  | 9.127530181  | 15.249814970 | 11.198663262 |
| O  | 13.234559936 | 12.977433989 | 9.917729159  |
| O  | 9.122749325  | 14.861082581 | 8.394699117  |
| O  | 13.321795391 | 13.154665168 | 7.275878683  |
| Al | 14.756178221 | 9.068384225  | 8.806454517  |
| Al | 14.753493877 | 8.937931675  | 11.625464269 |
| Al | 14.641986287 | 14.020850919 | 9.955653713  |
| O  | 14.495073004 | 15.080253847 | 11.423045390 |
| O  | 14.720613943 | 15.167452685 | 8.568428599  |
| Al | 10.520689920 | 15.095529472 | 9.869562727  |
| Al | 10.495493473 | 14.969475556 | 7.055399216  |
| Al | 10.449113155 | 10.113600650 | 8.647499957  |
| O  | 10.524352191 | 8.961464262  | 7.266063681  |
| O  | 10.461286580 | 9.024618523  | 10.076422814 |
| Al | 10.538430537 | 12.079811588 | 11.364685582 |
| O  | 10.506489631 | 13.168025864 | 9.911750814  |
| O  | 10.504684685 | 13.069454197 | 7.283533002  |
| Al | 14.622736532 | 11.984805677 | 7.312395396  |
| O  | 14.712309627 | 10.980510424 | 8.815763934  |
| O  | 14.719295708 | 11.123309605 | 11.416334611 |
| H  | 9.953967027  | 9.257681888  | 6.536102195  |
| H  | 12.648955466 | 9.456104071  | 7.569647865  |
| H  | 15.953013584 | 9.607869351  | 6.809221663  |
| H  | 14.725351422 | 14.454290841 | 5.344596208  |
| H  | 11.957077345 | 14.230692156 | 5.390264379  |
| H  | 9.047756208  | 15.584235186 | 5.114694587  |
| H  | 14.237284197 | 10.323721699 | 5.785628308  |
| H  | 16.665210880 | 12.828876669 | 6.399280172  |
| O  | 14.719364213 | 15.166569779 | 6.000341216  |
| O  | 11.919835871 | 15.083431975 | 5.857027996  |
| O  | 9.051464020  | 14.940094149 | 5.838100037  |
| O  | 14.952383428 | 10.970788158 | 5.918239075  |
| O  | 7.701922514  | 9.194304645  | 12.713461691 |
| H  | 7.784330890  | 8.474868379  | 13.362344508 |
| H  | 14.652892272 | 11.740836453 | 12.161245945 |
| O  | 13.325811691 | 9.028833670  | 12.787063824 |
| O  | 10.513329684 | 9.025591396  | 12.736674623 |
| O  | -0.626568106 | 9.030808800  | 12.793986858 |
| H  | -0.584974452 | 9.782552154  | 13.403031640 |
| O  | 2.415743359  | 13.234117850 | 12.649585287 |

|   |              |              |              |
|---|--------------|--------------|--------------|
| O | 10.587531935 | 13.313077652 | 12.650100220 |
| H | 7.486755332  | 14.962273269 | 11.322679960 |
| H | 13.499115173 | 14.999534609 | 11.543156887 |
| H | 3.346634979  | 14.593439958 | 11.774508839 |
| H | 11.528216986 | 14.707054244 | 12.035949652 |
| O | 1.873452300  | 5.002831018  | 12.791858789 |
| H | 7.555174273  | 6.948450482  | 11.450824792 |
| H | 4.143864199  | 6.555906230  | 11.087465586 |
| H | 15.966422599 | 6.951949632  | 11.498849925 |
| O | 7.701828564  | 0.967544784  | 12.638325049 |
| H | 7.781630718  | 0.318476340  | 13.350298670 |
| O | -0.697762043 | 0.887164873  | 12.713001949 |
| H | -0.617017357 | 0.112374268  | 13.289428444 |
| H | 6.339580664  | 3.460252149  | 12.075783810 |
| O | 4.901462344  | 0.817228460  | 12.641376559 |
| O | 2.097975199  | 0.882211062  | 12.563703543 |
| H | 14.800900475 | 3.591139580  | 12.126229851 |
| O | 13.259347155 | 0.892659570  | 12.786805529 |
| O | 10.439724455 | 0.963769260  | 12.641229704 |
| O | 2.171610937  | 9.113995016  | 12.641127086 |
| O | 4.914004948  | 8.942915504  | 12.697772195 |
| H | 2.170817963  | 8.324379626  | 13.203604703 |
| H | 4.860995938  | 9.668082575  | 13.337550616 |
| H | 13.182688906 | 8.204687861  | 13.299092535 |
| H | 10.550440492 | 9.644722982  | 13.482880081 |
| H | 13.246950312 | 1.628560660  | 13.415952063 |
| H | 10.382263071 | 1.719595244  | 13.245337081 |
| H | 2.093805197  | 1.623890591  | 13.188854067 |
| H | 4.807791021  | -0.009365188 | 13.138751461 |
| H | 9.449940205  | 14.746105481 | 11.981258902 |
| H | 10.667051320 | 13.054288439 | 13.578057375 |
| H | 1.715892736  | 13.909858542 | 12.691356187 |
| H | 0.063655599  | 14.625215949 | 10.933604597 |
| H | 1.072284391  | 6.577208409  | 12.006709451 |
| H | 2.696245779  | 5.431404188  | 13.074810127 |
| H | 6.299860677  | 11.676715188 | 12.040315716 |
| W | 10.527139100 | 6.677740416  | 12.929135260 |
| O | 10.517257415 | 4.924594765  | 12.737966342 |
| O | 9.202357901  | 7.261819374  | 11.444051807 |
| H | 12.070484426 | 7.055346048  | 13.532819449 |
| C | 8.724056800  | 6.858210121  | 14.200641606 |
| H | 8.532600441  | 7.861230607  | 14.612320380 |
| C | 10.793642510 | 6.571183243  | 15.147873757 |
| C | 9.359567751  | 6.054604826  | 15.336049236 |
| H | 7.804419330  | 6.454936840  | 13.749007585 |
| H | 9.310777782  | 4.974645072  | 15.133500610 |
| C | 11.883524334 | 5.583772434  | 15.571582417 |
| H | 11.807902936 | 5.391568623  | 16.657749644 |
| H | 11.784316902 | 4.621070350  | 15.051496615 |
| H | 12.893431606 | 5.970158582  | 15.369946696 |
| H | 8.931875767  | 6.222890353  | 16.344485444 |
| C | 11.004159686 | 7.908388455  | 15.857888776 |
| H | 10.995322178 | 7.762796840  | 16.953136648 |
| H | 11.970999646 | 8.360080685  | 15.589642385 |
| H | 10.215544323 | 8.640332818  | 15.628570664 |

**2-butene insertion (top path) into 2d species. E: -2336.224178859**

|    |             |             |              |
|----|-------------|-------------|--------------|
| Al | 0.723203635 | 4.903144639 | 8.589478586  |
| Al | 4.871352459 | 6.973676583 | 7.185712433  |
| O  | 3.415460293 | 7.189843991 | 11.204150756 |
| O  | 7.705716166 | 4.851435380 | 9.755407615  |

|    |              |             |              |
|----|--------------|-------------|--------------|
| O  | 3.396662052  | 6.844925352 | 8.433585158  |
| O  | 7.772540928  | 5.004907095 | 7.114147055  |
| Al | 4.783845881  | 3.070134171 | 10.030132072 |
| Al | 0.663681098  | 0.966406868 | 11.342070596 |
| O  | 7.629604998  | 0.807734573 | 7.279979252  |
| O  | 3.510395568  | 3.061320526 | 8.643370463  |
| O  | 7.571759406  | 1.126767125 | 10.080492176 |
| O  | 3.508271572  | 2.884029421 | 11.348861965 |
| Al | 7.772797003  | 3.024502503 | 9.934461063  |
| Al | 3.511212282  | 0.974470227 | 11.336527170 |
| O  | 4.992898589  | 0.728613543 | 7.213148626  |
| O  | 0.618337681  | 3.070458457 | 8.640553375  |
| O  | 4.995651990  | 1.132631318 | 10.084552161 |
| O  | 0.688275072  | 2.840644019 | 11.284964924 |
| Al | 3.490276967  | 4.895556388 | 8.468762250  |
| Al | 7.738719216  | 7.118875603 | 7.192595053  |
| O  | 0.765817558  | 7.189312243 | 11.287194463 |
| O  | 4.839687391  | 4.929957049 | 9.925752687  |
| O  | 0.773845789  | 6.850892479 | 8.473163790  |
| O  | 4.912232297  | 5.082479840 | 7.268551106  |
| Al | 6.240149023  | 0.942412712 | 8.614288053  |
| Al | 6.286472484  | 0.834016135 | 11.439574490 |
| Al | 6.313188045  | 5.913195418 | 9.889235316  |
| O  | 6.551145504  | 7.026078195 | 11.294223242 |
| O  | 6.326928829  | 7.085512903 | 8.503190867  |
| Al | 2.076042805  | 7.020045914 | 9.904833750  |
| Al | 2.094382652  | 6.872618120 | 7.072353874  |
| Al | 2.046477924  | 2.052637600 | 8.572902801  |
| O  | 2.186866850  | 0.954547815 | 7.126771891  |
| O  | 2.102455041  | 0.876328280 | 9.928592898  |
| Al | 2.073778761  | 3.951213057 | 11.382569943 |
| O  | 2.096783067  | 5.088084752 | 9.918447463  |
| O  | 2.038623555  | 5.008996395 | 7.284272401  |
| Al | 6.218618928  | 3.921627628 | 7.191302750  |
| O  | 6.254500761  | 2.851051619 | 8.652664401  |
| O  | 6.300432819  | 2.913087465 | 11.275602824 |
| H  | 1.923996849  | 1.380797812 | 6.296371102  |
| H  | 4.109148133  | 1.139912844 | 7.281484651  |
| H  | 7.336181666  | 1.400915658 | 6.543203150  |
| H  | 6.271012015  | 7.686096092 | 5.309245642  |
| H  | 3.572965619  | 6.206301201 | 5.317829254  |
| H  | 0.614581513  | 7.601385112 | 5.207043716  |
| H  | 5.885038227  | 2.434528744 | 5.404603310  |
| H  | 8.262640579  | 4.723155587 | 6.315946410  |
| O  | 6.318647445  | 6.944936042 | 5.932026182  |
| O  | 3.503843488  | 7.021105763 | 5.843466525  |
| O  | 0.625724338  | 6.947173585 | 5.918942233  |
| O  | 6.606007655  | 2.976216820 | 5.763591423  |
| Al | 9.154000765  | 4.909306568 | 8.543079792  |
| Al | 13.291911526 | 7.053567058 | 7.309970092  |
| O  | 11.676051352 | 7.257288251 | 11.368140484 |
| O  | 16.116512938 | 4.908607489 | 9.837502312  |
| O  | 11.779314719 | 6.929793906 | 8.550674971  |
| O  | 16.116424146 | 5.060242846 | 7.191214512  |
| Al | 13.202594898 | 3.101182643 | 10.110741807 |
| Al | 9.073145065  | 1.032759009 | 11.340162823 |
| O  | 15.977508662 | 0.890139765 | 7.433094942  |
| O  | 11.924635531 | 3.124906231 | 8.732458423  |
| O  | 15.950785914 | 1.130515717 | 10.170784841 |
| O  | 11.912736471 | 2.898992965 | 11.427636263 |
| Al | 16.187408937 | 3.057823502 | 10.028256874 |



|    |              |              |              |
|----|--------------|--------------|--------------|
| Al | 11.894557165 | 1.019354352  | 11.446095692 |
| O  | 13.249138074 | 0.792067288  | 7.508137516  |
| O  | 9.116215076  | 3.061657489  | 8.635440766  |
| O  | 13.395023205 | 1.154335807  | 10.236008589 |
| O  | 9.048846010  | 2.901572279  | 11.282924773 |
| Al | 11.913828578 | 4.963968755  | 8.556045099  |
| Al | 16.151036800 | 7.132865205  | 7.296310268  |
| O  | 13.239756566 | 4.929925894  | 9.997734139  |
| O  | 9.128065337  | 6.860999329  | 8.475720223  |
| O  | 13.317353038 | 5.166899581  | 7.356862601  |
| Al | 14.637464725 | 0.979054008  | 8.758488057  |
| Al | 14.691987959 | 0.881732749  | 11.574814989 |
| Al | 14.675496107 | 5.944273291  | 10.028715571 |
| O  | 14.957986326 | 7.025602256  | 11.442981220 |
| O  | 14.736030783 | 7.116892441  | 8.637664589  |
| Al | 10.448621606 | 7.089047387  | 9.961345052  |
| Al | 10.533841116 | 6.956380505  | 7.130097712  |
| Al | 10.564596386 | 2.016518231  | 8.557111730  |
| O  | 10.344876832 | 0.873652586  | 7.189392748  |
| O  | 10.515041458 | 0.884734347  | 10.007748426 |
| Al | 10.483282466 | 3.916476462  | 11.270235147 |
| O  | 10.454788350 | 5.150895186  | 9.942032350  |
| O  | 10.513958121 | 5.087343935  | 7.299286997  |
| Al | 14.579073653 | 3.973759210  | 7.343702574  |
| O  | 14.651619731 | 2.898934859  | 8.791626863  |
| O  | 14.723359866 | 2.982785130  | 11.373929472 |
| H  | 9.363560637  | 0.990777302  | 7.071438122  |
| H  | 13.377609614 | 1.362468814  | 6.725971214  |
| H  | 15.714072526 | 1.432615044  | 6.659200928  |
| H  | 14.642976959 | 7.780834609  | 5.466847537  |
| H  | 12.087372402 | 6.235920331  | 5.479099077  |
| H  | 9.083758791  | 6.663460542  | 5.097701692  |
| H  | 14.360996840 | 3.114337232  | 5.120191533  |
| H  | 16.602551080 | 4.891784396  | 6.357168491  |
| O  | 14.726672443 | 7.025987941  | 6.068212500  |
| O  | 11.980876701 | 7.089835234  | 5.933141191  |
| O  | 9.112644595  | 7.176458619  | 5.916322031  |
| O  | 14.646424711 | 2.832139707  | 6.000011224  |
| Al | 0.733894410  | 12.989424417 | 8.557266963  |
| Al | 4.869611907  | 14.988270666 | 7.070941991  |
| O  | 3.505327183  | 15.251993892 | 11.052784183 |
| O  | 7.693307832  | 12.980539457 | 9.755292735  |
| O  | 3.408249412  | 14.866990165 | 8.322225667  |
| O  | 7.722561769  | 12.994720062 | 7.051128236  |
| Al | 4.793025754  | 11.113279945 | 9.974665366  |
| Al | 0.724422064  | 9.149041055  | 11.446489914 |
| O  | 7.636131313  | 8.942077335  | 7.368427145  |
| O  | 3.502604773  | 11.047175643 | 8.564104404  |
| O  | 7.623045517  | 9.270077967  | 10.158589958 |
| O  | 3.518016016  | 10.925272904 | 11.271638223 |
| Al | 7.780803582  | 11.170435361 | 10.014172716 |
| Al | 3.548550145  | 9.063066648  | 11.372238202 |
| O  | 4.990941742  | 8.861307317  | 7.347986886  |
| O  | 0.616383330  | 11.174092648 | 8.712595580  |
| O  | 5.056087579  | 9.188852834  | 10.150918407 |
| O  | 0.711108846  | 11.044652722 | 11.372796167 |
| Al | 3.494510212  | 12.908679650 | 8.369607826  |
| Al | 7.700318323  | 15.087939184 | 7.137626960  |
| O  | 0.794558185  | 15.238608699 | 11.129317581 |
| O  | 4.824531982  | 12.917216968 | 9.767239744  |
| O  | 0.776618717  | 14.921989271 | 8.381952766  |

|    |              |              |              |
|----|--------------|--------------|--------------|
| O  | 4.898911898  | 13.076624899 | 7.122166020  |
| Al | 6.318197209  | 9.031953906  | 8.692634228  |
| Al | 6.327212089  | 8.971484422  | 11.510725043 |
| Al | 6.216872129  | 13.971623145 | 9.855140424  |
| O  | 6.481202658  | 15.027842858 | 11.284749041 |
| O  | 6.301479611  | 15.109236927 | 8.444670722  |
| Al | 2.162144343  | 15.086708339 | 9.809322836  |
| Al | 2.094444632  | 14.917124490 | 6.983491829  |
| Al | 1.992457163  | 10.091785519 | 8.602464098  |
| O  | 2.109888149  | 8.952023801  | 7.192796948  |
| O  | 2.043382747  | 8.950802122  | 10.005542783 |
| Al | 2.170783975  | 12.078659546 | 11.356401699 |
| O  | 2.105774780  | 13.154758560 | 9.836621889  |
| O  | 2.024323556  | 13.058321246 | 7.206756396  |
| Al | 6.202099573  | 11.911043224 | 7.185570468  |
| O  | 6.267475490  | 10.919125680 | 8.697919378  |
| O  | 6.301125314  | 11.068460556 | 11.284509458 |
| H  | 2.346026842  | 9.362431947  | 6.346102175  |
| H  | 4.167874881  | 9.330084583  | 7.579242003  |
| H  | 7.394560764  | 9.555613924  | 6.632271074  |
| H  | 6.348138633  | 14.257467304 | 5.256020065  |
| H  | 3.515158004  | 14.173605279 | 5.261201331  |
| H  | 0.570629280  | 15.657071150 | 5.078891713  |
| H  | 5.720648767  | 10.274759829 | 5.659052146  |
| H  | 8.282461141  | 12.770231530 | 6.279106209  |
| O  | 6.317463337  | 15.019803216 | 5.851511445  |
| O  | 3.492690384  | 15.011485633 | 5.753234319  |
| O  | 0.618784946  | 15.084002088 | 5.854807834  |
| O  | 6.464664663  | 10.893087842 | 5.768085812  |
| Al | 9.139077228  | 12.967457391 | 8.537909056  |
| Al | 13.255928662 | 15.073017543 | 7.220824734  |
| O  | 11.839461790 | 15.260887332 | 11.275785885 |
| O  | 16.133909242 | 13.067860828 | 9.903635167  |
| O  | 11.776252951 | 14.918833251 | 8.468472887  |
| O  | 16.129680116 | 13.078668586 | 7.183277490  |
| Al | 13.226549239 | 11.158952903 | 10.112822734 |
| Al | 9.074450121  | 9.179897910  | 11.412881136 |
| O  | 16.116734614 | 8.948099229  | 7.521094829  |
| O  | 11.938789926 | 11.075485761 | 8.712921964  |
| O  | 16.024126218 | 9.275311240  | 10.253044235 |
| O  | 11.924670540 | 10.968753410 | 11.422744351 |
| Al | 16.207519669 | 11.203429598 | 10.118012016 |
| Al | 11.971193729 | 9.093970641  | 11.428211040 |
| O  | 13.462095293 | 8.934950426  | 7.436753137  |
| O  | 9.041843477  | 11.141737536 | 8.643919188  |
| O  | 13.468914427 | 9.213784846  | 10.247362284 |
| O  | 9.105911449  | 11.047356702 | 11.352574410 |
| Al | 11.911732529 | 12.947650341 | 8.486442903  |
| Al | 16.137854405 | 15.222817617 | 7.235546651  |
| O  | 9.127524957  | 15.249932755 | 11.198730170 |
| O  | 13.234495457 | 12.977405896 | 9.917761477  |
| O  | 9.122790668  | 14.861300758 | 8.394753415  |
| O  | 13.321827768 | 13.154676124 | 7.275920126  |
| Al | 14.756129388 | 9.068323011  | 8.806298800  |
| Al | 14.753650823 | 8.937435888  | 11.625486196 |
| Al | 14.641931319 | 14.020893504 | 9.955604850  |
| O  | 14.494842796 | 15.080525471 | 11.422908084 |
| O  | 14.720530568 | 15.167606119 | 8.568524709  |
| Al | 10.520753354 | 15.095959766 | 9.869562661  |
| Al | 10.495511853 | 14.970162246 | 7.055632243  |
| Al | 10.448948350 | 10.113171466 | 8.648048240  |

|    |              |              |              |
|----|--------------|--------------|--------------|
| O  | 10.524397113 | 8.961269741  | 7.266554265  |
| O  | 10.461117422 | 9.023800995  | 10.076918931 |
| Al | 10.538426664 | 12.079911160 | 11.363916846 |
| O  | 10.506461733 | 13.168217217 | 9.911635545  |
| O  | 10.504720406 | 13.069588390 | 7.283538506  |
| Al | 14.622726749 | 11.984845397 | 7.312323104  |
| O  | 14.712203893 | 10.980403967 | 8.815655148  |
| O  | 14.719335526 | 11.123391743 | 11.415875138 |
| H  | 9.954756773  | 9.257429587  | 6.536009390  |
| H  | 12.648578557 | 9.455534473  | 7.569439863  |
| H  | 15.952978453 | 9.607817945  | 6.809166156  |
| H  | 14.725348163 | 14.454305516 | 5.344598504  |
| H  | 11.956698409 | 14.230566965 | 5.390654237  |
| H  | 9.047662353  | 15.584423768 | 5.114731536  |
| H  | 14.237197339 | 10.323965285 | 5.785176200  |
| H  | 16.665184530 | 12.828978861 | 6.399263262  |
| O  | 14.719384966 | 15.166564408 | 6.000369303  |
| O  | 11.919841202 | 15.083500506 | 5.857112908  |
| O  | 9.051573039  | 14.940343762 | 5.838191664  |
| O  | 14.952413421 | 10.970790516 | 5.918226675  |
| O  | 7.701005000  | 9.195340318  | 12.712784169 |
| H  | 7.777435571  | 8.486273090  | 13.373127628 |
| H  | 14.653119888 | 11.741088325 | 12.160646224 |
| O  | 13.325956566 | 9.029253150  | 12.787068056 |
| O  | 10.513805270 | 9.027599991  | 12.737312307 |
| O  | -0.626535016 | 9.030861045  | 12.793991105 |
| H  | -0.585215934 | 9.783057004  | 13.402508301 |
| O  | 2.415739121  | 13.234067206 | 12.649550793 |
| O  | 10.587623852 | 13.313011875 | 12.649899834 |
| H  | 7.487203477  | 14.962739665 | 11.322209867 |
| H  | 13.498757825 | 14.999941899 | 11.542704928 |
| H  | 3.346595958  | 14.593475075 | 11.774514952 |
| H  | 11.528362292 | 14.707397248 | 12.035801687 |
| O  | 1.873569760  | 5.002761283  | 12.791836145 |
| H  | 7.554748203  | 6.948154824  | 11.452899356 |
| H  | 4.143888789  | 6.555952931  | 11.086799447 |
| H  | 15.966613054 | 6.951982391  | 11.498742250 |
| O  | 7.701937260  | 0.967490416  | 12.638503126 |
| H  | 7.781533837  | 0.316385658  | 13.348671815 |
| O  | -0.697786358 | 0.887109889  | 12.713062006 |
| H  | -0.617226279 | 0.111786209  | 13.288818937 |
| H  | 6.339020943  | 3.460246311  | 12.075951458 |
| O  | 4.901537268  | 0.817221912  | 12.641335504 |
| O  | 2.097983279  | 0.882194881  | 12.563672792 |
| H  | 14.802177296 | 3.591268335  | 12.126457177 |
| O  | 13.259129353 | 0.892755417  | 12.787123211 |
| O  | 10.439733289 | 0.963503884  | 12.641568739 |
| O  | 2.171591870  | 9.113963114  | 12.641116318 |
| O  | 4.913894481  | 8.942827364  | 12.698012539 |
| H  | 2.170395025  | 8.324288997  | 13.203509051 |
| H  | 4.860445418  | 9.667946599  | 13.337806407 |
| H  | 13.185325076 | 8.209453517  | 13.305801015 |
| H  | 10.542460510 | 9.658832930  | 13.473315097 |
| H  | 13.247155950 | 1.629690005  | 13.415082319 |
| H  | 10.382074485 | 1.715833608  | 13.249919304 |
| H  | 2.093665404  | 1.623895885  | 13.188789953 |
| H  | 4.807968494  | -0.009729312 | 13.138150446 |
| H  | 9.450013668  | 14.745975932 | 11.981093557 |
| H  | 10.667544256 | 13.055065740 | 13.578008844 |
| H  | 1.715897152  | 13.909848234 | 12.691044100 |
| H  | 0.063597216  | 14.625270431 | 10.933354960 |

|   |              |              |              |
|---|--------------|--------------|--------------|
| H | 1.071901041  | 6.576926098  | 12.006606043 |
| H | 2.696194130  | 5.433406465  | 13.072213558 |
| H | 6.299955073  | 11.676307612 | 12.040587204 |
| W | 10.527788546 | 6.679334587  | 12.939689674 |
| O | 10.516676212 | 4.920688069  | 12.791417824 |
| O | 9.203027579  | 7.259698565  | 11.446726258 |
| H | 12.074146368 | 7.049311227  | 13.539499397 |
| C | 8.738009500  | 6.903393374  | 14.219095252 |
| H | 8.612367896  | 7.920250940  | 14.631559106 |
| C | 10.771255770 | 6.585265387  | 15.141114756 |
| C | 9.340212622  | 6.088332993  | 15.364497906 |
| H | 7.791462457  | 6.543616913  | 13.783502821 |
| H | 10.844889798 | 7.611855884  | 15.543747314 |
| C | 11.909426078 | 5.726660118  | 15.685539244 |
| H | 11.796089693 | 5.568659740  | 16.771647907 |
| H | 11.921842829 | 4.737033519  | 15.204967799 |
| H | 12.893494252 | 6.185104003  | 15.514143048 |
| H | 9.294911391  | 5.013869652  | 15.117279146 |
| C | 8.736881848  | 6.302412530  | 16.755861306 |
| H | 7.686221508  | 5.977006407  | 16.790144922 |
| H | 9.289418179  | 5.742210649  | 17.525633540 |
| H | 8.769023667  | 7.369397459  | 17.026093262 |

**1butene (1,2) insertion (top path) into 2b species. E: -2349.9941413027**

|    |             |             |              |
|----|-------------|-------------|--------------|
| Al | 0.723624100 | 4.902283722 | 8.588771788  |
| Al | 4.873204533 | 6.970406328 | 7.169112421  |
| O  | 3.414763287 | 7.190447048 | 11.199972668 |
| O  | 7.698339520 | 4.858573952 | 9.760097613  |
| O  | 3.401546611 | 6.848588799 | 8.422656157  |
| O  | 7.775506726 | 5.005682028 | 7.117652466  |
| Al | 4.786361411 | 3.073083095 | 10.031766098 |
| Al | 0.664290979 | 0.966728728 | 11.342199093 |
| O  | 7.629809884 | 0.808402637 | 7.279827905  |
| O  | 3.511341305 | 3.062425100 | 8.644168666  |
| O  | 7.573360184 | 1.127387493 | 10.080839446 |
| O  | 3.509217138 | 2.885478849 | 11.349577685 |
| Al | 7.770949349 | 3.025864129 | 9.938434377  |
| Al | 3.512131244 | 0.974786693 | 11.336226970 |
| O  | 4.993017847 | 0.729498963 | 7.213244258  |
| O  | 0.618649899 | 3.070321043 | 8.640421189  |
| O  | 4.995952523 | 1.133335469 | 10.084227321 |
| O  | 0.688925534 | 2.841173287 | 11.284610087 |
| Al | 3.492942355 | 4.896903268 | 8.466387455  |
| Al | 7.738730292 | 7.116724361 | 7.191082578  |
| O  | 0.766652990 | 7.189438008 | 11.287199007 |
| O  | 4.841736072 | 4.934500813 | 9.926788621  |
| O  | 0.774450317 | 6.850543658 | 8.472373772  |
| O  | 4.913487229 | 5.081304133 | 7.266403562  |
| Al | 6.240782289 | 0.944358431 | 8.614370137  |
| Al | 6.286917252 | 0.838411368 | 11.440096609 |
| Al | 6.307601677 | 5.932392221 | 9.888505266  |
| O  | 6.544696078 | 7.083020595 | 11.275803552 |
| O  | 6.320694676 | 7.091733856 | 8.491803568  |
| Al | 2.075300570 | 7.017597494 | 9.902972007  |
| Al | 2.095745464 | 6.871857476 | 7.069454210  |
| Al | 2.047670519 | 2.053224224 | 8.573366202  |
| O  | 2.186873818 | 0.955061338 | 7.126813871  |
| O  | 2.102705482 | 0.876675915 | 9.928716836  |
| Al | 2.074877600 | 3.951819138 | 11.383141522 |
| O  | 2.097358652 | 5.088687196 | 9.917767862  |
| O  | 2.039004900 | 5.008814967 | 7.284111327  |

|    |              |             |              |
|----|--------------|-------------|--------------|
| Al | 6.222643916  | 3.923132866 | 7.191339392  |
| O  | 6.256537771  | 2.854624007 | 8.653939657  |
| O  | 6.301066893  | 2.912180651 | 11.275029447 |
| H  | 1.921898754  | 1.381334240 | 6.297092131  |
| H  | 4.109712662  | 1.141736009 | 7.280977930  |
| H  | 7.336861338  | 1.402158969 | 6.543185627  |
| H  | 6.272413966  | 7.685721273 | 5.306585605  |
| H  | 3.564267230  | 6.203844477 | 5.310674238  |
| H  | 0.608446664  | 7.581728926 | 5.190825647  |
| H  | 5.885396551  | 2.435150749 | 5.406328733  |
| H  | 8.272730063  | 4.719319970 | 6.325854471  |
| O  | 6.322242276  | 6.941956812 | 5.926117843  |
| O  | 3.502061866  | 7.017853842 | 5.838505203  |
| O  | 0.625382437  | 6.946615062 | 5.919365948  |
| O  | 6.607544449  | 2.976311740 | 5.763735319  |
| Al | 9.152531085  | 4.913594952 | 8.567882343  |
| Al | 13.291758406 | 7.051792283 | 7.311370271  |
| O  | 11.667197585 | 7.256919469 | 11.371423655 |
| O  | 16.116949984 | 4.908391788 | 9.837444174  |
| O  | 11.782252892 | 6.930960529 | 8.555177788  |
| O  | 16.116115347 | 5.059901280 | 7.191332256  |
| Al | 13.204562345 | 3.097095671 | 10.111880690 |
| Al | 9.073726550  | 1.032857119 | 11.340807275 |
| O  | 15.977534696 | 0.890080925 | 7.433087963  |
| O  | 11.925106601 | 3.124641224 | 8.737390940  |
| O  | 15.951485463 | 1.130451483 | 10.170854219 |
| O  | 11.917159157 | 2.893150922 | 11.428028825 |
| Al | 16.188058378 | 3.057435874 | 10.028408964 |
| Al | 11.895664543 | 1.016347966 | 11.446314687 |
| O  | 13.249367603 | 0.792025640 | 7.508101408  |
| O  | 9.114071109  | 3.064029268 | 8.639112344  |
| O  | 13.396174412 | 1.150194305 | 10.235763257 |
| O  | 9.053509392  | 2.902576792 | 11.284866167 |
| Al | 11.919970148 | 4.964613202 | 8.572600789  |
| Al | 16.150590501 | 7.132966942 | 7.296832436  |
| O  | 13.240979924 | 4.928994685 | 9.998997654  |
| O  | 9.126815041  | 6.862604798 | 8.480206632  |
| O  | 13.316558134 | 5.166550125 | 7.358219783  |
| Al | 14.637830432 | 0.978033859 | 8.758641174  |
| Al | 14.692671848 | 0.879645367 | 11.574974559 |
| Al | 14.677011002 | 5.944383063 | 10.029821116 |
| O  | 14.958323095 | 7.025521719 | 11.443191144 |
| O  | 14.736285889 | 7.116101816 | 8.637992909  |
| Al | 10.459396143 | 7.091909181 | 9.963609739  |
| Al | 10.532373849 | 6.953435135 | 7.140023539  |
| Al | 10.562647178 | 2.019294484 | 8.560201272  |
| O  | 10.345547567 | 0.875888614 | 7.190810909  |
| O  | 10.515031252 | 0.884435201 | 10.008341054 |
| Al | 10.493253259 | 3.911485510 | 11.288901278 |
| O  | 10.449227305 | 5.156849277 | 9.984257206  |
| O  | 10.515111613 | 5.086761498 | 7.346735504  |
| Al | 14.578343930 | 3.973460548 | 7.344010720  |
| O  | 14.651681517 | 2.898530640 | 8.791790580  |
| O  | 14.723637280 | 2.982479256 | 11.373385034 |
| H  | 9.364186259  | 0.992066592 | 7.072332527  |
| H  | 13.377902910 | 1.362070241 | 6.725741772  |
| H  | 15.713649931 | 1.432452258 | 6.659292255  |
| H  | 14.641479580 | 7.784370266 | 5.470870363  |
| H  | 12.085832288 | 6.232318090 | 5.482515040  |
| H  | 9.083570893  | 6.667384224 | 5.096430446  |
| H  | 14.362211647 | 3.114171802 | 5.119729833  |

|    |              |              |              |
|----|--------------|--------------|--------------|
| H  | 16.602332811 | 4.891507410  | 6.357365552  |
| O  | 14.726207252 | 7.026029652  | 6.067813403  |
| O  | 11.975354270 | 7.084669259  | 5.938407745  |
| O  | 9.114615001  | 7.174500222  | 5.918596627  |
| O  | 14.646452113 | 2.832217419  | 5.999989907  |
| Al | 0.733923122  | 12.989314328 | 8.557335645  |
| Al | 4.869552683  | 14.989745897 | 7.069901569  |
| O  | 3.505333478  | 15.252159427 | 11.052688947 |
| O  | 7.694190329  | 12.982182599 | 9.755284122  |
| O  | 3.407722207  | 14.868360344 | 8.322071847  |
| O  | 7.724976637  | 12.996877407 | 7.048964517  |
| Al | 4.791457166  | 11.114094303 | 9.957682174  |
| Al | 0.723550965  | 9.149504137  | 11.449327907 |
| O  | 7.637186754  | 8.942314848  | 7.364259282  |
| O  | 3.501725538  | 11.050717767 | 8.561185496  |
| O  | 7.626433471  | 9.277035666  | 10.152030871 |
| O  | 3.521224533  | 10.927347426 | 11.264339961 |
| Al | 7.782299431  | 11.172895308 | 10.004775365 |
| Al | 3.542012581  | 9.064332103  | 11.346537603 |
| O  | 4.993117976  | 8.864364448  | 7.283656928  |
| O  | 0.616668712  | 11.172936985 | 8.712234339  |
| O  | 5.052408561  | 9.194191278  | 10.100194786 |
| O  | 0.712281504  | 11.044504376 | 11.372535125 |
| Al | 3.494093622  | 12.911008309 | 8.367995165  |
| Al | 7.700762386  | 15.088954968 | 7.136314789  |
| O  | 0.794709037  | 15.238798404 | 11.129361814 |
| O  | 4.825389234  | 12.918318890 | 9.766396350  |
| O  | 0.776379025  | 14.922128327 | 8.381918983  |
| O  | 4.897801238  | 13.079168280 | 7.120794300  |
| Al | 6.305348564  | 9.041456709  | 8.663903784  |
| Al | 6.330234203  | 8.997445491  | 11.484957513 |
| Al | 6.217512463  | 13.973834521 | 9.853887018  |
| O  | 6.481013606  | 15.031832276 | 11.283628470 |
| O  | 6.301576995  | 15.109499159 | 8.440942312  |
| Al | 2.162058453  | 15.087067753 | 9.809394290  |
| Al | 2.094121946  | 14.918214532 | 6.983411113  |
| Al | 1.995086479  | 10.093947814 | 8.601394933  |
| O  | 2.111354369  | 8.952726783  | 7.193273068  |
| O  | 2.045156957  | 8.950688262  | 10.003648195 |
| Al | 2.172669226  | 12.078824192 | 11.354841559 |
| O  | 2.105641629  | 13.155299919 | 9.836232876  |
| O  | 2.023867868  | 13.059034724 | 7.206244408  |
| Al | 6.203950849  | 11.918759893 | 7.172346103  |
| O  | 6.276247609  | 10.930419868 | 8.679901350  |
| O  | 6.300577605  | 11.063808228 | 11.278990244 |
| H  | 2.260463774  | 9.373779006  | 6.332201607  |
| H  | 4.154216801  | 9.309345699  | 7.507051478  |
| H  | 7.410184377  | 9.558833973  | 6.625988935  |
| H  | 6.348228253  | 14.263283591 | 5.249345159  |
| H  | 3.515025586  | 14.173163382 | 5.262397446  |
| H  | 0.570141080  | 15.656755741 | 5.078476561  |
| H  | 5.730641527  | 10.257963185 | 5.679685832  |
| H  | 8.288525315  | 12.774435281 | 6.278918962  |
| O  | 6.317726556  | 15.020872992 | 5.850711587  |
| O  | 3.492253251  | 15.011963170 | 5.752903712  |
| O  | 0.618616920  | 15.084106250 | 5.854683314  |
| O  | 6.465146458  | 10.892786812 | 5.764296924  |
| Al | 9.140182747  | 12.969192718 | 8.537602356  |
| Al | 13.256025063 | 15.072990937 | 7.220939409  |
| O  | 11.839523859 | 15.259862225 | 11.276027417 |
| O  | 16.134030353 | 13.067442997 | 9.903403941  |

|    |              |              |              |
|----|--------------|--------------|--------------|
| O  | 11.776631499 | 14.918915697 | 8.468575614  |
| O  | 16.129605428 | 13.078471278 | 7.183502979  |
| Al | 13.225281149 | 11.157158119 | 10.114589332 |
| Al | 9.074637213  | 9.194191930  | 11.406980842 |
| O  | 16.116156884 | 8.948245883  | 7.520686001  |
| O  | 11.939647299 | 11.075365901 | 8.712772168  |
| O  | 16.024652112 | 9.275066634  | 10.253760679 |
| O  | 11.923924954 | 10.967161718 | 11.423774058 |
| Al | 16.207639804 | 11.202878810 | 10.118400349 |
| Al | 11.968851603 | 9.087849627  | 11.434608926 |
| O  | 13.461801711 | 8.932941543  | 7.436823761  |
| O  | 9.044279203  | 11.143367390 | 8.642185407  |
| O  | 13.468696847 | 9.213035166  | 10.248456020 |
| O  | 9.104478916  | 11.051878987 | 11.350832490 |
| Al | 11.912116561 | 12.947661637 | 8.486929963  |
| Al | 16.137856327 | 15.222750967 | 7.235649522  |
| O  | 9.127576071  | 15.249998954 | 11.198758411 |
| O  | 13.234490952 | 12.976663061 | 9.917914017  |
| O  | 9.123193626  | 14.862246863 | 8.394527301  |
| O  | 13.321911894 | 13.154605653 | 7.275882112  |
| Al | 14.755590730 | 9.067851055  | 8.807720882  |
| Al | 14.752287866 | 8.937146130  | 11.626844934 |
| Al | 14.641874359 | 14.020186337 | 9.955647820  |
| O  | 14.495189512 | 15.079746737 | 11.423047367 |
| O  | 14.720629522 | 15.167296569 | 8.568552639  |
| Al | 10.520655641 | 15.096322798 | 9.869696276  |
| Al | 10.496200532 | 14.971365193 | 7.056209468  |
| Al | 10.449894364 | 10.113725253 | 8.647346720  |
| O  | 10.525157305 | 8.960234668  | 7.267711199  |
| O  | 10.459146861 | 9.024669486  | 10.076102909 |
| Al | 10.539525797 | 12.080593895 | 11.364545597 |
| O  | 10.506883035 | 13.168643504 | 9.911567276  |
| O  | 10.505247988 | 13.070098981 | 7.283302938  |
| Al | 14.622563986 | 11.984675862 | 7.313259067  |
| O  | 14.712223382 | 10.979851568 | 8.816036530  |
| O  | 14.719315754 | 11.122978242 | 11.416958764 |
| H  | 9.961915816  | 9.255326958  | 6.532050716  |
| H  | 12.648109898 | 9.453269744  | 7.569473660  |
| H  | 15.945483318 | 9.606618201  | 6.808806250  |
| H  | 14.725249061 | 14.454042843 | 5.344840796  |
| H  | 11.955977278 | 14.230445332 | 5.391262640  |
| H  | 9.050166189  | 15.586541673 | 5.114929356  |
| H  | 14.234416425 | 10.328102254 | 5.780842111  |
| H  | 16.664876430 | 12.829714935 | 6.399084236  |
| O  | 14.719423875 | 15.166550616 | 6.000337563  |
| O  | 11.919946482 | 15.083738577 | 5.857124924  |
| O  | 9.052883347  | 14.941814610 | 5.837842917  |
| O  | 14.952428246 | 10.970758349 | 5.918348886  |
| O  | 7.705766372  | 9.194503881  | 12.715018924 |
| H  | 7.796594222  | 8.450647639  | 13.337465633 |
| H  | 14.653269382 | 11.740202317 | 12.162144343 |
| O  | 13.324079500 | 9.026242910  | 12.788888702 |
| O  | 10.500391684 | 9.027735887  | 12.731162643 |
| O  | -0.626938524 | 9.030639209  | 12.794174172 |
| H  | -0.585961719 | 9.777491094  | 13.409113993 |
| O  | 2.416119944  | 13.233568982 | 12.649137311 |
| O  | 10.587656673 | 13.313326667 | 12.650256152 |
| H  | 7.486823127  | 14.965866108 | 11.321871155 |
| H  | 13.499195867 | 14.998868002 | 11.543179175 |
| H  | 3.346516141  | 14.593820130 | 11.774557095 |
| H  | 11.527754343 | 14.706012628 | 12.035709736 |

|   |              |              |              |
|---|--------------|--------------|--------------|
| O | 1.873967734  | 5.002609967  | 12.792204806 |
| H | 7.542823133  | 6.991803262  | 11.442139322 |
| H | 4.139388303  | 6.550487027  | 11.093368146 |
| H | 15.966746670 | 6.951704048  | 11.500842247 |
| O | 7.702501273  | 0.968313996  | 12.638950879 |
| H | 7.780520410  | 0.317423533  | 13.349440613 |
| O | -0.697495450 | 0.887170124  | 12.713009309 |
| H | -0.616042717 | 0.113088496  | 13.290288424 |
| H | 6.346183863  | 3.462764541  | 12.074008015 |
| O | 4.901570304  | 0.817350058  | 12.641428605 |
| O | 2.098330360  | 0.882506038  | 12.563517214 |
| H | 14.799678223 | 3.591171145  | 12.125999575 |
| O | 13.260095523 | 0.891952998  | 12.787347702 |
| O | 10.440025303 | 0.962823915  | 12.641795598 |
| O | 2.174415167  | 9.114252096  | 12.638182918 |
| O | 4.912099570  | 8.949478818  | 12.647083614 |
| H | 2.179821731  | 8.317377904  | 13.190557811 |
| H | 4.845379695  | 9.658965387  | 13.302902427 |
| H | 13.180287327 | 8.208352547  | 13.309124732 |
| H | 10.526647806 | 9.644870193  | 13.478997263 |
| H | 13.246956911 | 1.631576228  | 13.412132914 |
| H | 10.384158644 | 1.710927429  | 13.255302609 |
| H | 2.094132086  | 1.623927673  | 13.188959213 |
| H | 4.809288960  | -0.010621037 | 13.136717129 |
| H | 9.449233802  | 14.745540819 | 11.981131051 |
| H | 10.669444024 | 13.054547087 | 13.578006129 |
| H | 1.715431591  | 13.908420307 | 12.690947019 |
| H | 0.063641976  | 14.625575487 | 10.933653466 |
| H | 1.078729315  | 6.580994928  | 12.007543659 |
| H | 2.701803442  | 5.396007154  | 13.109080809 |
| H | 6.288597613  | 11.668657473 | 12.037371733 |
| W | 10.466867577 | 6.670451694  | 12.929456132 |
| O | 10.599925335 | 4.918117256  | 12.809703658 |
| O | 9.197484407  | 7.264350052  | 11.443777050 |
| H | 11.996194637 | 7.059957379  | 13.574154362 |
| C | 8.539923815  | 6.373530803  | 14.088563955 |
| H | 7.912064656  | 7.267182327  | 14.264877279 |
| C | 10.489006082 | 7.012539428  | 15.106779880 |
| C | 9.281635579  | 6.139673469  | 15.417239129 |
| H | 9.607033643  | 5.083769718  | 15.447582127 |
| C | 8.518784414  | 6.446142827  | 16.715584014 |
| H | 8.162579685  | 7.490355733  | 16.666051433 |
| H | 7.616865797  | 5.814374976  | 16.766687041 |
| C | 9.362848293  | 6.243548507  | 17.976149593 |
| H | 9.709592264  | 5.202062189  | 18.054856391 |
| H | 10.254008453 | 6.887377880  | 17.965648852 |
| H | 8.793583186  | 6.475261758  | 18.887465611 |
| H | 10.246545739 | 8.073090344  | 15.297371581 |
| H | 11.426150662 | 6.785534967  | 15.630931484 |
| C | 7.641394570  | 5.232433991  | 13.583559920 |
| H | 7.660717386  | 5.189601751  | 12.484756531 |
| H | 8.092856335  | 4.279826246  | 13.906018381 |
| C | 6.181692748  | 5.314685175  | 14.055153250 |
| H | 5.704998126  | 6.228078983  | 13.671996248 |
| H | 6.113895589  | 5.324678779  | 15.151706664 |
| H | 5.579209174  | 4.457134910  | 13.708041718 |

**isobutene (1,2) insertion (top path) into 2b species. E: -2349.994999687**

|    |             |             |              |
|----|-------------|-------------|--------------|
| Al | 0.723301571 | 4.903196892 | 8.589870786  |
| Al | 4.871090984 | 6.973661065 | 7.183543482  |
| O  | 3.416438663 | 7.190309323 | 11.203922647 |



|    |              |             |              |
|----|--------------|-------------|--------------|
| O  | 7.704305897  | 4.853539540 | 9.756199309  |
| O  | 3.397479230  | 6.845049752 | 8.432215326  |
| O  | 7.772726388  | 5.005097757 | 7.114470680  |
| Al | 4.785872709  | 3.070377899 | 10.031390826 |
| Al | 0.664273867  | 0.966574556 | 11.342203152 |
| O  | 7.629707024  | 0.807856389 | 7.280041058  |
| O  | 3.510931608  | 3.061358089 | 8.643788959  |
| O  | 7.575561193  | 1.127887577 | 10.081393903 |
| O  | 3.509186080  | 2.884233038 | 11.349485366 |
| Al | 7.774717505  | 3.025220406 | 9.937219067  |
| Al | 3.511983374  | 0.974343768 | 11.336666710 |
| O  | 4.993059086  | 0.728948077 | 7.213340864  |
| O  | 0.618553121  | 3.070547043 | 8.640490745  |
| O  | 4.996354354  | 1.132744320 | 10.084361059 |
| O  | 0.689372386  | 2.840878422 | 11.284948191 |
| Al | 3.490483800  | 4.895184523 | 8.468706436  |
| Al | 7.738994857  | 7.119510643 | 7.191559599  |
| O  | 0.766688455  | 7.189107840 | 11.287593445 |
| O  | 4.839406449  | 4.930069378 | 9.925643359  |
| O  | 0.774109786  | 6.850951345 | 8.473260665  |
| O  | 4.912604363  | 5.082417025 | 7.268502785  |
| Al | 6.240707109  | 0.943483194 | 8.614681292  |
| Al | 6.287764427  | 0.838951613 | 11.440444141 |
| Al | 6.309317977  | 5.915758373 | 9.884558641  |
| O  | 6.544691550  | 7.037400540 | 11.285351562 |
| O  | 6.326325874  | 7.086261987 | 8.499513366  |
| Al | 2.076978721  | 7.019485138 | 9.905314287  |
| Al | 2.094492130  | 6.872508900 | 7.072358978  |
| Al | 2.046937204  | 2.052746862 | 8.573224437  |
| O  | 2.186943353  | 0.954573695 | 7.126897317  |
| O  | 2.102808718  | 0.876346392 | 9.928725584  |
| Al | 2.075126866  | 3.951482641 | 11.383523173 |
| O  | 2.096971233  | 5.088092605 | 9.918652050  |
| O  | 2.038646369  | 5.008959704 | 7.284326932  |
| Al | 6.218848828  | 3.921215892 | 7.191254559  |
| O  | 6.256521170  | 2.852005701 | 8.652909645  |
| O  | 6.301876078  | 2.911829826 | 11.274079588 |
| H  | 1.922450014  | 1.380654291 | 6.296923271  |
| H  | 4.109485497  | 1.140640134 | 7.281362039  |
| H  | 7.336369521  | 1.401081986 | 6.543279510  |
| H  | 6.271160724  | 7.684762870 | 5.306516235  |
| H  | 3.572301249  | 6.206485536 | 5.316714580  |
| H  | 0.614049024  | 7.599568773 | 5.205558840  |
| H  | 5.885638184  | 2.434574497 | 5.404047104  |
| H  | 8.263336729  | 4.722516488 | 6.316868833  |
| O  | 6.318761378  | 6.944936962 | 5.930867351  |
| O  | 3.503724784  | 7.020954111 | 5.842939728  |
| O  | 0.625751619  | 6.947132443 | 5.919041269  |
| O  | 6.606396870  | 2.976274383 | 5.763421035  |
| Al | 9.153669495  | 4.910473929 | 8.543855153  |
| Al | 13.293042236 | 7.054179332 | 7.308790855  |
| O  | 11.671334869 | 7.256556835 | 11.366425671 |
| O  | 16.116442551 | 4.908470923 | 9.837368441  |
| O  | 11.780939634 | 6.929578707 | 8.548118144  |
| O  | 16.116680881 | 5.060531363 | 7.190975067  |
| Al | 13.209728300 | 3.097539120 | 10.093321985 |
| Al | 9.075640125  | 1.033854736 | 11.340876857 |
| O  | 15.977905249 | 0.889660418 | 7.432718581  |
| O  | 11.925322811 | 3.126726048 | 8.722792663  |
| O  | 15.953094681 | 1.130668422 | 10.170205855 |
| O  | 11.913079872 | 2.886885661 | 11.377331997 |

|    |              |              |              |
|----|--------------|--------------|--------------|
| Al | 16.189081064 | 3.057769971  | 10.029189915 |
| Al | 11.896292026 | 1.016724588  | 11.436701509 |
| O  | 13.249630126 | 0.791415695  | 7.507760879  |
| O  | 9.116232188  | 3.062720627  | 8.636249082  |
| O  | 13.399220201 | 1.145783470  | 10.231935956 |
| O  | 9.060150812  | 2.905430122  | 11.283980675 |
| Al | 11.915453328 | 4.963286245  | 8.552396566  |
| Al | 16.151248232 | 7.133234546  | 7.296805569  |
| O  | 13.239924871 | 4.929334355  | 9.995748520  |
| O  | 9.128988510  | 6.861389152  | 8.475691470  |
| O  | 13.318138122 | 5.167426232  | 7.355643021  |
| Al | 14.639376267 | 0.974997099  | 8.758347459  |
| Al | 14.692700619 | 0.881925751  | 11.573547752 |
| Al | 14.674977426 | 5.944286735  | 10.028860280 |
| O  | 14.958178843 | 7.025336347  | 11.442887778 |
| O  | 14.736118837 | 7.116927522  | 8.637444760  |
| Al | 10.460883338 | 7.091101043  | 9.955880599  |
| Al | 10.533932426 | 6.956252450  | 7.128400190  |
| Al | 10.565075636 | 2.017314488  | 8.556487555  |
| O  | 10.344480514 | 0.873556271  | 7.189279477  |
| O  | 10.514419707 | 0.882993936  | 10.005923838 |
| Al | 10.500367687 | 3.916331368  | 11.265302690 |
| O  | 10.452789286 | 5.153601788  | 9.945135736  |
| O  | 10.513663440 | 5.087801633  | 7.299673119  |
| Al | 14.579898223 | 3.974347949  | 7.341475988  |
| O  | 14.652728957 | 2.898120794  | 8.789312717  |
| O  | 14.723084673 | 2.981943484  | 11.370708937 |
| H  | 9.363066912  | 0.990409277  | 7.071901323  |
| H  | 13.377383245 | 1.361904980  | 6.725634492  |
| H  | 15.713055736 | 1.431798252  | 6.659058097  |
| H  | 14.644185291 | 7.781835974  | 5.467004518  |
| H  | 12.088294456 | 6.237132639  | 5.476760461  |
| H  | 9.082839923  | 6.663877144  | 5.096862634  |
| H  | 14.361541481 | 3.112725089  | 5.118998027  |
| H  | 16.603805726 | 4.892683382  | 6.357349534  |
| O  | 14.727048414 | 7.026282508  | 6.067634006  |
| O  | 11.981176082 | 7.090127547  | 5.932305870  |
| O  | 9.112624000  | 7.176355145  | 5.915785646  |
| O  | 14.646604965 | 2.831893136  | 5.999351363  |
| Al | 0.733781932  | 12.988795928 | 8.557451695  |
| Al | 4.869621245  | 14.988857724 | 7.071248431  |
| O  | 3.505406021  | 15.251928647 | 11.052766251 |
| O  | 7.692304346  | 12.981293657 | 9.755061808  |
| O  | 3.408269127  | 14.866920299 | 8.322298023  |
| O  | 7.722596652  | 12.994806669 | 7.051121376  |
| Al | 4.791888793  | 11.113393328 | 9.973807893  |
| Al | 0.724152130  | 9.148783547  | 11.446868753 |
| O  | 7.636035363  | 8.942424895  | 7.368513400  |
| O  | 3.502634182  | 11.047404626 | 8.564074037  |
| O  | 7.623902197  | 9.271258618  | 10.159420205 |
| O  | 3.518247058  | 10.925300172 | 11.271873606 |
| Al | 7.779682385  | 11.172681218 | 10.011947326 |
| Al | 3.548252705  | 9.062658172  | 11.371579349 |
| O  | 4.990575257  | 8.861539234  | 7.347396849  |
| O  | 0.616267371  | 11.172830879 | 8.712670478  |
| O  | 5.056205456  | 9.190266653  | 10.150896019 |
| O  | 0.711304223  | 11.044481347 | 11.372766876 |
| Al | 3.494297230  | 12.909075642 | 8.369536622  |
| Al | 7.700222338  | 15.088180438 | 7.137846950  |
| O  | 0.794803504  | 15.238530268 | 11.129444182 |
| O  | 4.824952101  | 12.917265275 | 9.767510165  |

|    |              |              |              |
|----|--------------|--------------|--------------|
| O  | 0.776647140  | 14.921871435 | 8.381888502  |
| O  | 4.898872492  | 13.076783789 | 7.122214784  |
| Al | 6.316767097  | 9.032237149  | 8.691721577  |
| Al | 6.327416359  | 8.976146084  | 11.511174329 |
| Al | 6.216364556  | 13.973779426 | 9.856358890  |
| O  | 6.481746564  | 15.031456122 | 11.284751930 |
| O  | 6.301488216  | 15.110227015 | 8.445219679  |
| Al | 2.161967620  | 15.086803014 | 9.809418125  |
| Al | 2.094369234  | 14.917233772 | 6.983559420  |
| Al | 1.992692508  | 10.091507466 | 8.602833773  |
| O  | 2.110101643  | 8.952050225  | 7.192965328  |
| O  | 2.044786479  | 8.950534417  | 10.005730358 |
| Al | 2.170591004  | 12.078707531 | 11.356599300 |
| O  | 2.105834992  | 13.154637199 | 9.836599693  |
| O  | 2.024291049  | 13.058209017 | 7.206768651  |
| Al | 6.202166871  | 11.911656841 | 7.185320755  |
| O  | 6.268399682  | 10.919564977 | 8.698065273  |
| O  | 6.301809519  | 11.067298237 | 11.285843220 |
| H  | 2.336592369  | 9.364080458  | 6.344451971  |
| H  | 4.166011932  | 9.329147831  | 7.575615341  |
| H  | 7.395228070  | 9.556509311  | 6.632525723  |
| H  | 6.347914643  | 14.257798748 | 5.256023519  |
| H  | 3.515354013  | 14.173477791 | 5.261572639  |
| H  | 0.570608509  | 15.656785622 | 5.078593746  |
| H  | 5.720826648  | 10.274492151 | 5.659630865  |
| H  | 8.282530060  | 12.770813257 | 6.278964920  |
| O  | 6.317454318  | 15.019947240 | 5.851748927  |
| O  | 3.492738018  | 15.011496006 | 5.753358152  |
| O  | 0.618869956  | 15.083866207 | 5.854606783  |
| O  | 6.464709972  | 10.893078969 | 5.768270958  |
| Al | 9.139311402  | 12.967888411 | 8.537645958  |
| Al | 13.255782691 | 15.072680514 | 7.220556235  |
| O  | 11.839292651 | 15.259925695 | 11.275099542 |
| O  | 16.133967304 | 13.067580102 | 9.903511590  |
| O  | 11.776246160 | 14.918615066 | 8.468257110  |
| O  | 16.129719120 | 13.078478164 | 7.183285226  |
| Al | 13.225383853 | 11.157130257 | 10.114519488 |
| Al | 9.076807013  | 9.190526635  | 11.406910318 |
| O  | 16.116670958 | 8.948183858  | 7.521159406  |
| O  | 11.938590283 | 11.075216481 | 8.712993207  |
| O  | 16.024153650 | 9.275171091  | 10.253468575 |
| O  | 11.923651737 | 10.966724966 | 11.423752714 |
| Al | 16.206996884 | 11.203107786 | 10.118574916 |
| Al | 11.969539622 | 9.086950516  | 11.433237676 |
| O  | 13.462375370 | 8.935312552  | 7.436798354  |
| O  | 9.041653310  | 11.142007760 | 8.643566226  |
| O  | 13.468733888 | 9.213380282  | 10.248161627 |
| O  | 9.104774897  | 11.050587303 | 11.351261466 |
| Al | 11.912031282 | 12.947662358 | 8.486679193  |
| Al | 16.138049133 | 15.221906508 | 7.235073577  |
| O  | 9.127612731  | 15.250069045 | 11.199036248 |
| O  | 13.234228064 | 12.976543568 | 9.917910535  |
| O  | 9.122638677  | 14.861052477 | 8.394706101  |
| O  | 13.321814312 | 13.154550339 | 7.275907442  |
| Al | 14.756115489 | 9.068249474  | 8.807323199  |
| Al | 14.752726398 | 8.936482606  | 11.626604160 |
| Al | 14.641586002 | 14.020266264 | 9.956106240  |
| O  | 14.495782936 | 15.079703120 | 11.423569198 |
| O  | 14.721028949 | 15.166713576 | 8.568258322  |
| Al | 10.519611968 | 15.095563935 | 9.869058947  |
| Al | 10.495641196 | 14.970531938 | 7.055566423  |

|    |              |              |              |
|----|--------------|--------------|--------------|
| Al | 10.448956589 | 10.113917869 | 8.646525557  |
| O  | 10.524608276 | 8.961250424  | 7.265700122  |
| O  | 10.458213450 | 9.023698478  | 10.074915816 |
| Al | 10.539857241 | 12.080559987 | 11.364422632 |
| O  | 10.506305966 | 13.168020213 | 9.911554254  |
| O  | 10.504770371 | 13.069502809 | 7.283482453  |
| Al | 14.622587982 | 11.984577311 | 7.312899196  |
| O  | 14.712037790 | 10.980224830 | 8.816138419  |
| O  | 14.719204882 | 11.123208119 | 11.417021004 |
| H  | 9.957334119  | 9.257718015  | 6.533466654  |
| H  | 12.649047992 | 9.456100404  | 7.569739940  |
| H  | 15.952285334 | 9.608033587  | 6.809486773  |
| H  | 14.725189601 | 14.454220302 | 5.344334082  |
| H  | 11.956298177 | 14.230585871 | 5.390226269  |
| H  | 9.047595001  | 15.584466524 | 5.114893406  |
| H  | 14.237137534 | 10.324121677 | 5.785187805  |
| H  | 16.664982964 | 12.828398457 | 6.399241640  |
| O  | 14.719397522 | 15.166422648 | 6.000184320  |
| O  | 11.919801286 | 15.083476893 | 5.856789141  |
| O  | 9.051467112  | 14.940282522 | 5.838265814  |
| O  | 14.952413181 | 10.970848342 | 5.918345377  |
| O  | 7.708077976  | 9.195460563  | 12.717321641 |
| H  | 7.804157632  | 8.474365042  | 13.364271825 |
| H  | 14.652856485 | 11.740630847 | 12.162003650 |
| O  | 13.324392593 | 9.027322829  | 12.788189556 |
| O  | 10.499513111 | 9.027452345  | 12.730242191 |
| O  | -0.626623030 | 9.030654252  | 12.793973548 |
| H  | -0.585611452 | 9.780809570  | 13.404961979 |
| O  | 2.415829953  | 13.234068656 | 12.649571545 |
| O  | 10.587538251 | 13.313087479 | 12.650334071 |
| H  | 7.487762964  | 14.966152885 | 11.322447576 |
| H  | 13.500085391 | 14.999242025 | 11.544462315 |
| H  | 3.346464163  | 14.593650591 | 11.774670895 |
| H  | 11.527411431 | 14.708653375 | 12.036280354 |
| O  | 1.874177051  | 5.002527608  | 12.792392917 |
| H  | 7.543840960  | 6.959050876  | 11.448060190 |
| H  | 4.142293548  | 6.552044780  | 11.095423429 |
| H  | 15.966582253 | 6.951053753  | 11.499702843 |
| O  | 7.703387623  | 0.969014042  | 12.638605880 |
| H  | 7.782397086  | 0.322497599  | 13.352887571 |
| O  | -0.697778407 | 0.887127256  | 12.712918011 |
| H  | -0.617512968 | 0.110942892  | 13.287588935 |
| H  | 6.343264723  | 3.462141754  | 12.073558238 |
| O  | 4.901900361  | 0.817379769  | 12.641529789 |
| O  | 2.098289720  | 0.882229613  | 12.563646588 |
| H  | 14.794825091 | 3.593213060  | 12.121586271 |
| O  | 13.258103291 | 0.893932732  | 12.783288831 |
| O  | 10.441857338 | 0.964409745  | 12.640259581 |
| O  | 2.172013637  | 9.113802790  | 12.641247817 |
| O  | 4.915008308  | 8.943517078  | 12.699792610 |
| H  | 2.171007340  | 8.323086780  | 13.202325927 |
| H  | 4.858383373  | 9.668100398  | 13.340049740 |
| H  | 13.180396996 | 8.211301781  | 13.311214351 |
| H  | 10.532283970 | 9.651752989  | 13.471857441 |
| H  | 13.245940666 | 1.625830619  | 13.416918686 |
| H  | 10.384373606 | 1.711641780  | 13.254827108 |
| H  | 2.093832437  | 1.623602341  | 13.189140658 |
| H  | 4.810178883  | -0.010505277 | 13.137070217 |
| H  | 9.449530210  | 14.745915385 | 11.981461320 |
| H  | 10.669908810 | 13.054782077 | 13.578164062 |
| H  | 1.715959186  | 13.909783309 | 12.691567575 |

|   |              |              |              |
|---|--------------|--------------|--------------|
| H | 0.063515094  | 14.625538441 | 10.933695675 |
| H | 1.077087943  | 6.579912148  | 12.007997588 |
| H | 2.701499667  | 5.403399821  | 13.101388618 |
| H | 6.300158156  | 11.677184917 | 12.040397770 |
| W | 10.480235332 | 6.659260497  | 12.925429161 |
| O | 10.670030356 | 4.914679066  | 12.798044420 |
| O | 9.200981615  | 7.260438414  | 11.445360531 |
| H | 11.988984186 | 7.093062593  | 13.586949448 |
| C | 8.552655337  | 6.339179581  | 14.066457744 |
| H | 7.877185979  | 7.210223531  | 14.115297757 |
| C | 10.482169661 | 6.993783791  | 15.102055937 |
| C | 9.199214955  | 6.252120997  | 15.481856153 |
| C | 7.703408303  | 5.161278463  | 13.567104818 |
| H | 8.202956119  | 4.217059334  | 13.827322650 |
| H | 7.679422690  | 5.164376766  | 12.468267930 |
| C | 6.264175350  | 5.166381707  | 14.104147498 |
| H | 5.675660595  | 4.299651005  | 13.755912818 |
| H | 6.247188882  | 5.133870467  | 15.202604113 |
| H | 5.737489078  | 6.075862416  | 13.779722425 |
| H | 11.396188003 | 6.672144845  | 15.624146045 |
| H | 10.380472619 | 8.079140356  | 15.270120247 |
| C | 9.515311696  | 4.819927125  | 15.932735648 |
| H | 10.091646229 | 4.845222253  | 16.869533382 |
| H | 8.598193681  | 4.242405052  | 16.118578358 |
| H | 10.112919710 | 4.280326386  | 15.185119723 |
| C | 8.390512421  | 6.956592557  | 16.582551653 |
| H | 7.445103105  | 6.433215980  | 16.791569027 |
| H | 8.965716830  | 7.007610356  | 17.520854051 |
| H | 8.144849106  | 7.987474459  | 16.283748862 |

**2butene insertion (top path) into 2b species. E: -2349.996076330**

|    |             |             |              |
|----|-------------|-------------|--------------|
| Al | 0.723506686 | 4.903416957 | 8.590013425  |
| Al | 4.871256844 | 6.974225681 | 7.184283543  |
| O  | 3.415685984 | 7.192937107 | 11.204231548 |
| O  | 7.702635332 | 4.858429904 | 9.758242671  |
| O  | 3.397084454 | 6.845503391 | 8.433056920  |
| O  | 7.773147788 | 5.005588845 | 7.114671334  |
| Al | 4.784799699 | 3.073638509 | 10.030445068 |
| Al | 0.664204392 | 0.967059924 | 11.342481044 |
| O  | 7.629755678 | 0.808628934 | 7.279762376  |
| O  | 3.511030697 | 3.062581694 | 8.643766806  |
| O  | 7.575892602 | 1.131595429 | 10.079602703 |
| O  | 3.509104591 | 2.885976783 | 11.349653298 |
| Al | 7.774506003 | 3.028003304 | 9.934823630  |
| Al | 3.512289719 | 0.975433861 | 11.336730945 |
| O  | 4.993173267 | 0.730047566 | 7.213344940  |
| O  | 0.618596566 | 3.070630582 | 8.640504968  |
| O  | 4.995464497 | 1.136278751 | 10.083519554 |
| O  | 0.689019791 | 2.841253700 | 11.284944028 |
| Al | 3.490711485 | 4.896829197 | 8.468820206  |
| Al | 7.738517801 | 7.120540919 | 7.191735502  |
| O  | 0.766633369 | 7.189538827 | 11.287557340 |
| O  | 4.842613820 | 4.934076352 | 9.927935292  |
| O  | 0.774111008 | 6.851166092 | 8.473391949  |
| O  | 4.911918000 | 5.083193128 | 7.268389360  |
| Al | 6.241160426 | 0.945994399 | 8.615333075  |
| Al | 6.286784579 | 0.859080195 | 11.441767497 |
| Al | 6.310878056 | 5.928576367 | 9.893661477  |
| O  | 6.544731944 | 7.084122415 | 11.279169924 |
| O  | 6.326085391 | 7.087945823 | 8.499498180  |
| Al | 2.077481713 | 7.020448177 | 9.905792539  |

|    |              |             |              |
|----|--------------|-------------|--------------|
| Al | 2.094393247  | 6.872769043 | 7.072551964  |
| Al | 2.047286133  | 2.053294066 | 8.573352700  |
| O  | 2.186701525  | 0.955142091 | 7.126741016  |
| O  | 2.102785655  | 0.876875628 | 9.928748050  |
| Al | 2.074636458  | 3.952117784 | 11.383742449 |
| O  | 2.097127286  | 5.088389107 | 9.918734106  |
| O  | 2.038675670  | 5.009232028 | 7.284407879  |
| Al | 6.219171958  | 3.923908914 | 7.191011156  |
| O  | 6.257165229  | 2.858068998 | 8.654080440  |
| O  | 6.301134994  | 2.912971847 | 11.275876974 |
| H  | 1.918892841  | 1.381105373 | 6.297758943  |
| H  | 4.109851526  | 1.142391676 | 7.279942250  |
| H  | 7.336828694  | 1.402088270 | 6.542981259  |
| H  | 6.270792451  | 7.685036303 | 5.306773459  |
| H  | 3.572473207  | 6.206048623 | 5.318000479  |
| H  | 0.614084070  | 7.599432320 | 5.205391019  |
| H  | 5.884651540  | 2.434724813 | 5.406074344  |
| H  | 8.265028483  | 4.722835503 | 6.317909744  |
| O  | 6.318769365  | 6.945117088 | 5.930997068  |
| O  | 3.503677233  | 7.021162953 | 5.843222228  |
| O  | 0.625767191  | 6.947229376 | 5.919087490  |
| O  | 6.606003279  | 2.976676897 | 5.763934772  |
| Al | 9.153424635  | 4.911915668 | 8.544202572  |
| Al | 13.292978902 | 7.053956383 | 7.308928221  |
| O  | 11.664027772 | 7.255391168 | 11.367159122 |
| O  | 16.116574031 | 4.908540706 | 9.837435020  |
| O  | 11.780693508 | 6.929821736 | 8.548072499  |
| O  | 16.116642703 | 5.060690219 | 7.191064877  |
| Al | 13.208140467 | 3.099018613 | 10.094701343 |
| Al | 9.074619587  | 1.035295368 | 11.339842629 |
| O  | 15.977775419 | 0.889862505 | 7.432684402  |
| O  | 11.925402148 | 3.126909864 | 8.722925834  |
| O  | 15.952618383 | 1.130692688 | 10.170283514 |
| O  | 11.910196316 | 2.891583701 | 11.379947598 |
| Al | 16.188762628 | 3.057816509 | 10.028925885 |
| Al | 11.895283575 | 1.018596679 | 11.437316308 |
| O  | 13.249557278 | 0.791475005 | 7.507842291  |
| O  | 9.115948846  | 3.063988604 | 8.635965173  |
| O  | 13.398303163 | 1.147397323 | 10.232545243 |
| O  | 9.054376653  | 2.905021148 | 11.283380310 |
| Al | 11.914722576 | 4.963513833 | 8.553147281  |
| Al | 16.151344038 | 7.133199785 | 7.296770294  |
| O  | 13.240017975 | 4.929996461 | 9.995810937  |
| O  | 9.128911497  | 6.861965393 | 8.475335106  |
| O  | 13.317948151 | 5.167528184 | 7.355796529  |
| Al | 14.639001071 | 0.975765444 | 8.758362315  |
| Al | 14.692453628 | 0.882255071 | 11.573560376 |
| Al | 14.675346325 | 5.944314239 | 10.028678493 |
| O  | 14.958055740 | 7.025559351 | 11.442855583 |
| O  | 14.736248183 | 7.117106808 | 8.637484220  |
| Al | 10.458370382 | 7.091509194 | 9.953926646  |
| Al | 10.534066428 | 6.956081842 | 7.127658989  |
| Al | 10.564746062 | 2.018217636 | 8.556668026  |
| O  | 10.344445980 | 0.873975302 | 7.189538400  |
| O  | 10.514397716 | 0.883528373 | 10.005921205 |
| Al | 10.491985946 | 3.918805660 | 11.269149699 |
| O  | 10.452413185 | 5.153649337 | 9.944103829  |
| O  | 10.513486231 | 5.088055934 | 7.299354726  |
| Al | 14.579605197 | 3.974436208 | 7.341673298  |
| O  | 14.652591912 | 2.898354502 | 8.789548528  |
| O  | 14.722883449 | 2.982162699 | 11.371055410 |

|    |              |              |              |
|----|--------------|--------------|--------------|
| H  | 9.362984558  | 0.990733598  | 7.072062063  |
| H  | 13.376796159 | 1.362302759  | 6.725890358  |
| H  | 15.712792269 | 1.432095431  | 6.659114555  |
| H  | 14.644000592 | 7.781623028  | 5.466838645  |
| H  | 12.088797413 | 6.237309469  | 5.476522586  |
| H  | 9.081958030  | 6.664637702  | 5.096528362  |
| H  | 14.361577938 | 3.112843011  | 5.119087769  |
| H  | 16.603792757 | 4.892593809  | 6.357512808  |
| O  | 14.727053931 | 7.026318580  | 6.067753730  |
| O  | 11.981440856 | 7.090258318  | 5.932114010  |
| O  | 9.112528987  | 7.176453060  | 5.915829981  |
| O  | 14.646592153 | 2.831957986  | 5.999442647  |
| Al | 0.733573368  | 12.992197040 | 8.557356624  |
| Al | 4.869830849  | 14.990108363 | 7.071123520  |
| O  | 3.505632992  | 15.252412922 | 11.053134157 |
| O  | 7.686977511  | 12.983941588 | 9.756637357  |
| O  | 3.407785694  | 14.869345380 | 8.322331689  |
| O  | 7.722650986  | 12.995232418 | 7.051523896  |
| Al | 4.790057118  | 11.118034959 | 9.971411639  |
| Al | 0.724106968  | 9.149350707  | 11.446743881 |
| O  | 7.635840632  | 8.943402111  | 7.368553363  |
| O  | 3.502236325  | 11.048880273 | 8.563742879  |
| O  | 7.624619856  | 9.276661944  | 10.157703767 |
| O  | 3.519830364  | 10.939524976 | 11.272609526 |
| Al | 7.779652533  | 11.175183173 | 10.010274227 |
| Al | 3.548373994  | 9.069109715  | 11.370525138 |
| O  | 4.990372443  | 8.862056426  | 7.347813640  |
| O  | 0.616724776  | 11.178897757 | 8.712784327  |
| O  | 5.054055878  | 9.195149597  | 10.151141475 |
| O  | 0.711066383  | 11.045086224 | 11.372682917 |
| Al | 3.494214595  | 12.911347847 | 8.369421904  |
| Al | 7.699776987  | 15.089155487 | 7.137455381  |
| O  | 0.794612799  | 15.239069388 | 11.129275572 |
| O  | 4.826334868  | 12.921692967 | 9.768482839  |
| O  | 0.776337668  | 14.922512681 | 8.381620936  |
| O  | 4.898104426  | 13.077737485 | 7.122078794  |
| Al | 6.316507737  | 9.034245013  | 8.692849604  |
| Al | 6.326088944  | 8.998800522  | 11.513488682 |
| Al | 6.214445467  | 13.985830668 | 9.862344238  |
| O  | 6.479849781  | 15.072528436 | 11.278090822 |
| O  | 6.301046722  | 15.112723975 | 8.443170249  |
| Al | 2.162178809  | 15.088185466 | 9.809563832  |
| Al | 2.094521262  | 14.918515367 | 6.983169923  |
| Al | 1.991452762  | 10.094084789 | 8.602349389  |
| O  | 2.109876547  | 8.952646135  | 7.193393409  |
| O  | 2.044634476  | 8.952478612  | 10.005607595 |
| Al | 2.167565572  | 12.083503830 | 11.356531466 |
| O  | 2.105665315  | 13.156278027 | 9.836268893  |
| O  | 2.024401271  | 13.059446634 | 7.206611446  |
| Al | 6.201671357  | 11.913515869 | 7.185070031  |
| O  | 6.265437499  | 10.922749927 | 8.697967614  |
| O  | 6.301751060  | 11.068378068 | 11.287683172 |
| H  | 2.336579525  | 9.364169127  | 6.344655160  |
| H  | 4.165634085  | 9.329531156  | 7.575582827  |
| H  | 7.394883412  | 9.557452688  | 6.632523792  |
| H  | 6.347863291  | 14.258512149 | 5.255034834  |
| H  | 3.515680900  | 14.172981911 | 5.262806710  |
| H  | 0.570352433  | 15.656084008 | 5.077717130  |
| H  | 5.720597601  | 10.274862370 | 5.660713814  |
| H  | 8.283348756  | 12.770764601 | 6.280063701  |
| O  | 6.317448979  | 15.020174837 | 5.851344771  |

|    |              |              |              |
|----|--------------|--------------|--------------|
| O  | 3.492852348  | 15.011805274 | 5.753231489  |
| O  | 0.618837440  | 15.084156062 | 5.854451671  |
| O  | 6.464581215  | 10.893485207 | 5.768606433  |
| Al | 9.138092766  | 12.969956316 | 8.538437273  |
| Al | 13.255722692 | 15.072838208 | 7.220599754  |
| O  | 11.839140093 | 15.260549262 | 11.275200511 |
| O  | 16.133485387 | 13.068384673 | 9.904273628  |
| O  | 11.776191454 | 14.918700459 | 8.468367246  |
| O  | 16.129563228 | 13.078974681 | 7.183029031  |
| Al | 13.225200922 | 11.157388622 | 10.114310800 |
| Al | 9.075768804  | 9.193149112  | 11.405346089 |
| O  | 16.116818132 | 8.948498087  | 7.521120109  |
| O  | 11.938482570 | 11.075659949 | 8.712892886  |
| O  | 16.024506736 | 9.275584092  | 10.253115735 |
| O  | 11.924012788 | 10.966755683 | 11.423740702 |
| Al | 16.207028246 | 11.204267340 | 10.118143236 |
| Al | 11.969010151 | 9.086880113  | 11.432403018 |
| O  | 13.462402209 | 8.935258860  | 7.436812771  |
| O  | 9.041395205  | 11.143879053 | 8.643612226  |
| O  | 13.468531367 | 9.212861243  | 10.248268714 |
| O  | 9.104632976  | 11.051613334 | 11.351369313 |
| Al | 11.911625297 | 12.947920114 | 8.486534209  |
| Al | 16.137758079 | 15.222343242 | 7.234705617  |
| O  | 9.126690136  | 15.250822947 | 11.198617757 |
| O  | 13.234093489 | 12.976645465 | 9.917918599  |
| O  | 9.122421577  | 14.861751024 | 8.394826654  |
| O  | 13.321758008 | 13.154600191 | 7.275878546  |
| Al | 14.756197882 | 9.068244672  | 8.807108819  |
| Al | 14.752895195 | 8.937108474  | 11.626376269 |
| Al | 14.641139437 | 14.020808466 | 9.956274413  |
| O  | 14.495362023 | 15.080082245 | 11.423755215 |
| O  | 14.720838641 | 15.166934283 | 8.568294715  |
| Al | 10.520024612 | 15.096299158 | 9.869358491  |
| Al | 10.495537346 | 14.970790153 | 7.055583726  |
| Al | 10.448487769 | 10.114879998 | 8.645998437  |
| O  | 10.524463832 | 8.961585697  | 7.265628180  |
| O  | 10.458589769 | 9.024879367  | 10.074392150 |
| Al | 10.540221485 | 12.080721962 | 11.364864843 |
| O  | 10.505809416 | 13.168525045 | 9.911770138  |
| O  | 10.504350149 | 13.069778871 | 7.283638089  |
| Al | 14.622745405 | 11.984864500 | 7.312826312  |
| O  | 14.712043533 | 10.980294363 | 8.816231992  |
| O  | 14.719044337 | 11.122909747 | 11.417222471 |
| H  | 9.957375159  | 9.257874164  | 6.533160803  |
| H  | 12.648931451 | 9.455812816  | 7.569780965  |
| H  | 15.951569145 | 9.607843514  | 6.809096473  |
| H  | 14.725142285 | 14.454066081 | 5.344498686  |
| H  | 11.956181650 | 14.230469766 | 5.390579975  |
| H  | 9.047808711  | 15.584864354 | 5.114962871  |
| H  | 14.236834030 | 10.324546519 | 5.785006377  |
| H  | 16.665666944 | 12.828537936 | 6.399668815  |
| O  | 14.719313234 | 15.166483447 | 6.000113170  |
| O  | 11.919771741 | 15.083507278 | 5.856883310  |
| O  | 9.051483002  | 14.940598756 | 5.838277035  |
| O  | 14.952436330 | 10.970867587 | 5.918377053  |
| O  | 7.709815450  | 9.193834834  | 12.719904531 |
| H  | 7.803402637  | 8.452980561  | 13.345733798 |
| H  | 14.652645910 | 11.740621845 | 12.161975075 |
| O  | 13.323813217 | 9.024276757  | 12.788808269 |
| O  | 10.502531516 | 9.026890157  | 12.728905866 |
| O  | -0.626712578 | 9.030778676  | 12.793885889 |



|   |              |              |              |
|---|--------------|--------------|--------------|
| H | -0.585183740 | 9.780454768  | 13.405418221 |
| O | 2.414967687  | 13.235663631 | 12.650937384 |
| O | 10.587475760 | 13.313244696 | 12.650517897 |
| H | 7.485493745  | 14.997794315 | 11.317934350 |
| H | 13.499550341 | 14.999922056 | 11.544461968 |
| H | 3.344400049  | 14.595046975 | 11.775453312 |
| H | 11.526950298 | 14.709531512 | 12.036444657 |
| O | 1.873971510  | 5.002874392  | 12.792571952 |
| H | 7.542973472  | 6.993155257  | 11.444792578 |
| H | 4.141662695  | 6.554951917  | 11.095711698 |
| H | 15.966432023 | 6.951198322  | 11.500129211 |
| O | 7.704361875  | 0.971270194  | 12.639677836 |
| H | 7.777655506  | 0.315711108  | 13.346217241 |
| O | -0.697945826 | 0.887215423  | 12.712990924 |
| H | -0.617516263 | 0.110821670  | 13.287347724 |
| H | 6.345985541  | 3.463816535  | 12.074808462 |
| O | 4.900393528  | 0.821850202  | 12.642392936 |
| O | 2.098144751  | 0.882356924  | 12.563416419 |
| H | 14.796502832 | 3.593358536  | 12.121824232 |
| O | 13.257776685 | 0.894358332  | 12.783387297 |
| O | 10.441538181 | 0.964878496  | 12.639978023 |
| O | 2.172316221  | 9.114926366  | 12.640708544 |
| O | 4.913145191  | 8.948368012  | 12.701694569 |
| H | 2.175014841  | 8.321432818  | 13.197906314 |
| H | 4.847243766  | 9.666279681  | 13.348503045 |
| H | 13.184333623 | 8.202486090  | 13.304127522 |
| H | 10.530874803 | 9.641343680  | 13.478898814 |
| H | 13.246407448 | 1.626279528  | 13.416979584 |
| H | 10.382385863 | 1.714867113  | 13.251044798 |
| H | 2.094603748  | 1.622721860  | 13.190085247 |
| H | 4.816223119  | -0.012214149 | 13.128766971 |
| H | 9.446166064  | 14.745052148 | 11.980919521 |
| H | 10.669316538 | 13.054229273 | 13.578205685 |
| H | 1.715763080  | 13.911621877 | 12.697709320 |
| H | 0.063279734  | 14.626207815 | 10.933301300 |
| H | 1.077531626  | 6.580567453  | 12.007976415 |
| H | 2.701379816  | 5.402168944  | 13.103349320 |
| H | 6.298224379  | 11.676940923 | 12.043282085 |
| W | 10.465495277 | 6.669666070  | 12.924529386 |
| O | 10.601131616 | 4.915532582  | 12.802289650 |
| O | 9.196882524  | 7.264315093  | 11.440501890 |
| H | 11.998301677 | 7.043548415  | 13.561245023 |
| C | 8.542839246  | 6.353740620  | 14.077787827 |
| H | 7.915051870  | 7.245323588  | 14.265885257 |
| C | 10.471893066 | 7.058555716  | 15.107091252 |
| C | 9.303918581  | 6.115760078  | 15.389195585 |
| C | 7.641954824  | 5.215074027  | 13.575832017 |
| H | 8.092765907  | 4.260374063  | 13.892997300 |
| H | 7.654998913  | 5.175289343  | 12.476696068 |
| C | 6.185872259  | 5.302630961  | 14.057607078 |
| H | 5.576479844  | 4.448459914  | 13.714634722 |
| H | 6.126762053  | 5.313055731  | 15.154658408 |
| H | 5.710747630  | 6.218687050  | 13.678873317 |
| H | 10.086880209 | 8.090283151  | 15.220636250 |
| H | 9.684972486  | 5.077923221  | 15.383933331 |
| C | 11.725937536 | 6.880695442  | 15.955473164 |
| H | 11.493862848 | 6.952267959  | 17.032163216 |
| H | 12.185593869 | 5.896641267  | 15.781348827 |
| H | 12.487285246 | 7.641273315  | 15.729886189 |
| C | 8.545842351  | 6.344464042  | 16.703100475 |
| H | 7.728665498  | 5.619677900  | 16.831645365 |

|   |             |             |              |
|---|-------------|-------------|--------------|
| H | 9.213517940 | 6.252265654 | 17.573385149 |
| H | 8.107126381 | 7.354382852 | 16.718119053 |

**Ibutene (1,2) insertion (side path) into 2a species. E: -2349.9948435518**

|    |              |             |              |
|----|--------------|-------------|--------------|
| Al | 0.723481537  | 4.903187766 | 8.589295771  |
| Al | 4.871336500  | 6.973607541 | 7.185389818  |
| O  | 3.415451640  | 7.190025670 | 11.204091212 |
| O  | 7.703160185  | 4.851125213 | 9.758171773  |
| O  | 3.396876883  | 6.844859854 | 8.433090749  |
| O  | 7.774665695  | 5.005367993 | 7.116928962  |
| Al | 4.783702981  | 3.070035045 | 10.029960303 |
| Al | 0.663621081  | 0.966372739 | 11.342065034 |
| O  | 7.629623715  | 0.807820829 | 7.280013680  |
| O  | 3.510323947  | 3.061315352 | 8.643400113  |
| O  | 7.571324058  | 1.126268496 | 10.080625989 |
| O  | 3.508261451  | 2.884024088 | 11.348887467 |
| Al | 7.771667647  | 3.022752168 | 9.935569406  |
| Al | 3.511109520  | 0.974499197 | 11.336581076 |
| O  | 4.992842455  | 0.728636364 | 7.213034254  |
| O  | 0.618536762  | 3.070558882 | 8.640516545  |
| O  | 4.995550170  | 1.132598847 | 10.084534771 |
| O  | 0.688260663  | 2.840639336 | 11.284817853 |
| Al | 3.490581769  | 4.895422068 | 8.468283418  |
| Al | 7.738432760  | 7.116348400 | 7.193691144  |
| O  | 0.765901758  | 7.189314525 | 11.287325640 |
| O  | 4.839123687  | 4.929799082 | 9.925828859  |
| O  | 0.773962184  | 6.850986005 | 8.473226031  |
| O  | 4.912695349  | 5.082348175 | 7.268468293  |
| Al | 6.240008697  | 0.942651074 | 8.613982576  |
| Al | 6.286183191  | 0.833621213 | 11.439592418 |
| Al | 6.311130695  | 5.914010360 | 9.889715871  |
| O  | 6.551050797  | 7.026470034 | 11.293948664 |
| O  | 6.326344890  | 7.085135876 | 8.503212140  |
| Al | 2.076173918  | 7.019956312 | 9.904786215  |
| Al | 2.094402086  | 6.872676742 | 7.072332011  |
| Al | 2.046542010  | 2.052658783 | 8.572871692  |
| O  | 2.186926924  | 0.954547589 | 7.126754483  |
| O  | 2.102414684  | 0.876339614 | 9.928583358  |
| Al | 2.073906800  | 3.951236108 | 11.382475947 |
| O  | 2.096814797  | 5.088137436 | 9.918435426  |
| O  | 2.038671827  | 5.008995514 | 7.284154616  |
| Al | 6.221097827  | 3.922917245 | 7.191288662  |
| O  | 6.254462876  | 2.851375496 | 8.652903883  |
| O  | 6.300150559  | 2.912878903 | 11.275866159 |
| H  | 1.924852511  | 1.380909225 | 6.296163726  |
| H  | 4.109171174  | 1.140078241 | 7.281407300  |
| H  | 7.336666239  | 1.401387800 | 6.543312631  |
| H  | 6.271700573  | 7.686963696 | 5.310291381  |
| H  | 3.573014110  | 6.206639819 | 5.317305353  |
| H  | 0.615059909  | 7.602665483 | 5.207938670  |
| H  | 5.884894486  | 2.434271803 | 5.406658649  |
| H  | 8.270467894  | 4.720040832 | 6.323873571  |
| O  | 6.318664044  | 6.944835354 | 5.931971450  |
| O  | 3.503797284  | 7.021141806 | 5.843384997  |
| O  | 0.625673428  | 6.947339438 | 5.918844967  |
| O  | 6.606605977  | 2.976281261 | 5.763711817  |
| Al | 9.153352593  | 4.911578904 | 8.564738373  |
| Al | 13.291120499 | 7.052499827 | 7.311342510  |
| O  | 11.675442609 | 7.257873307 | 11.372259767 |
| O  | 16.117164603 | 4.909062306 | 9.837778152  |
| O  | 11.780876548 | 6.931470523 | 8.556458590  |

|    |              |              |              |
|----|--------------|--------------|--------------|
| O  | 16.116476495 | 5.061257978  | 7.191150068  |
| Al | 13.202397757 | 3.106213036  | 10.115073848 |
| Al | 9.072758627  | 1.032124628  | 11.340390769 |
| O  | 15.977463059 | 0.890550289  | 7.432973081  |
| O  | 11.925076539 | 3.128125069  | 8.736761761  |
| O  | 15.950082846 | 1.131002189  | 10.170670194 |
| O  | 11.912076940 | 2.900890218  | 11.432011593 |
| Al | 16.187412650 | 3.058326820  | 10.027747260 |
| Al | 11.894068985 | 1.023701219  | 11.446068467 |
| O  | 13.248977864 | 0.792734338  | 7.508813073  |
| O  | 9.115214394  | 3.062313115  | 8.637953411  |
| O  | 13.395477050 | 1.184727459  | 10.237141745 |
| O  | 9.047275241  | 2.900195085  | 11.284520235 |
| Al | 11.918087788 | 4.967183177  | 8.571909424  |
| Al | 16.150951378 | 7.132840351  | 7.296160016  |
| O  | 13.241262913 | 4.932209962  | 9.999369934  |
| O  | 9.126270925  | 6.862320292  | 8.480161933  |
| O  | 13.316329723 | 5.167220216  | 7.358316456  |
| Al | 14.637349522 | 0.983997323  | 8.757849189  |
| Al | 14.691748054 | 0.888331821  | 11.575098288 |
| Al | 14.678053730 | 5.945893452  | 10.029075663 |
| O  | 14.958178179 | 7.026067067  | 11.443509043 |
| O  | 14.736431030 | 7.117151974  | 8.637812540  |
| Al | 10.449506444 | 7.089460918  | 9.969052395  |
| Al | 10.532024140 | 6.954687231  | 7.141213583  |
| Al | 10.565258771 | 2.020126067  | 8.559020184  |
| O  | 10.345911950 | 0.875466401  | 7.190768424  |
| O  | 10.515159719 | 0.885274618  | 10.008147672 |
| Al | 10.480935027 | 3.914247167  | 11.286213280 |
| O  | 10.451121243 | 5.156118328  | 9.978425053  |
| O  | 10.514734766 | 5.087347339  | 7.343991170  |
| Al | 14.578435684 | 3.974894292  | 7.343183663  |
| O  | 14.653091029 | 2.901478838  | 8.790855670  |
| O  | 14.725439032 | 2.985515934  | 11.378330559 |
| H  | 9.364558315  | 0.992276389  | 7.073187818  |
| H  | 13.375898860 | 1.363609756  | 6.726733714  |
| H  | 15.715024845 | 1.433390681  | 6.658979431  |
| H  | 14.642629900 | 7.782366044  | 5.468617788  |
| H  | 12.084469929 | 6.231819723  | 5.484320612  |
| H  | 9.085024342  | 6.665949789  | 5.097867111  |
| H  | 14.363307123 | 3.114135483  | 5.119253498  |
| H  | 16.602708002 | 4.892749225  | 6.357172376  |
| O  | 14.725960846 | 7.026034540  | 6.068222995  |
| O  | 11.974763907 | 7.085036236  | 5.938795268  |
| O  | 9.113939203  | 7.174735443  | 5.919062925  |
| O  | 14.646429117 | 2.832391592  | 5.999954180  |
| Al | 0.733893420  | 12.989385082 | 8.557207758  |
| Al | 4.869652075  | 14.988288028 | 7.070842479  |
| O  | 3.505290992  | 15.252020631 | 11.052797948 |
| O  | 7.693145276  | 12.980547722 | 9.755225992  |
| O  | 3.408221319  | 14.866999014 | 8.322220409  |
| O  | 7.722643611  | 12.994757479 | 7.051104984  |
| Al | 4.792942658  | 11.113217092 | 9.974441550  |
| Al | 0.724480287  | 9.149105714  | 11.446474310 |
| O  | 7.636224552  | 8.941065479  | 7.368455658  |
| O  | 3.502508112  | 11.047132531 | 8.564078153  |
| O  | 7.623009692  | 9.270430032  | 10.158230234 |
| O  | 3.518093310  | 10.925511740 | 11.271679141 |
| Al | 7.780629066  | 11.170496828 | 10.013709855 |
| Al | 3.548708696  | 9.063172037  | 11.372180859 |
| O  | 4.991002941  | 8.861320239  | 7.347994932  |

|    |              |              |              |
|----|--------------|--------------|--------------|
| O  | 0.616367847  | 11.174035597 | 8.712620267  |
| O  | 5.056114261  | 9.188934712  | 10.150994369 |
| O  | 0.711097752  | 11.044706935 | 11.372802587 |
| Al | 3.494518408  | 12.908686514 | 8.369567653  |
| Al | 7.700432830  | 15.088152075 | 7.137489602  |
| O  | 0.794359990  | 15.238713849 | 11.129267189 |
| O  | 4.824467117  | 12.917227094 | 9.767238803  |
| O  | 0.776534425  | 14.922019079 | 8.382038318  |
| O  | 4.898904305  | 13.076645124 | 7.122157207  |
| Al | 6.318654449  | 9.031864435  | 8.692634886  |
| Al | 6.327613017  | 8.972276808  | 11.510784473 |
| Al | 6.216750511  | 13.971643873 | 9.854784398  |
| O  | 6.481025830  | 15.027480821 | 11.284753485 |
| O  | 6.301444924  | 15.109253504 | 8.444279985  |
| Al | 2.162131934  | 15.086702809 | 9.809320059  |
| Al | 2.094395500  | 14.917164966 | 6.983490999  |
| Al | 1.992401674  | 10.091712979 | 8.602380808  |
| O  | 2.109770479  | 8.952032285  | 7.192659793  |
| O  | 2.043502206  | 8.950800192  | 10.005582583 |
| Al | 2.170778772  | 12.078736876 | 11.356360243 |
| O  | 2.105722379  | 13.154788370 | 9.836622305  |
| O  | 2.024316019  | 13.058375357 | 7.206779719  |
| Al | 6.202126898  | 11.911072228 | 7.185339558  |
| O  | 6.266606879  | 10.919229620 | 8.697708460  |
| O  | 6.301234685  | 11.068421765 | 11.284662073 |
| H  | 2.349973211  | 9.361889895  | 6.346829750  |
| H  | 4.168406782  | 9.330344091  | 7.580365356  |
| H  | 7.394746294  | 9.554252097  | 6.632098055  |
| H  | 6.348262628  | 14.257461063 | 5.255935799  |
| H  | 3.515119360  | 14.173606697 | 5.261221660  |
| H  | 0.570584849  | 15.656963847 | 5.078982538  |
| H  | 5.720698207  | 10.274423865 | 5.659568852  |
| H  | 8.282777689  | 12.769983181 | 6.279333747  |
| O  | 6.317524953  | 15.019810927 | 5.851406115  |
| O  | 3.492646318  | 15.011512627 | 5.753216039  |
| O  | 0.618671385  | 15.084016891 | 5.854992729  |
| O  | 6.464570823  | 10.893041570 | 5.768001760  |
| Al | 9.139298790  | 12.967534543 | 8.538087509  |
| Al | 13.256154847 | 15.073371070 | 7.221171663  |
| O  | 11.840252862 | 15.263647496 | 11.274718958 |
| O  | 16.133721532 | 13.067902421 | 9.903708970  |
| O  | 11.776494125 | 14.919072470 | 8.468759797  |
| O  | 16.129587126 | 13.078670148 | 7.183520041  |
| Al | 13.226012807 | 11.158670150 | 10.113096775 |
| Al | 9.074862839  | 9.182787133  | 11.414107607 |
| O  | 16.116607021 | 8.948076558  | 7.521127779  |
| O  | 11.938788025 | 11.075740535 | 8.713046180  |
| O  | 16.024162139 | 9.275391343  | 10.253047205 |
| O  | 11.924770317 | 10.968788635 | 11.423347188 |
| Al | 16.207475035 | 11.203391582 | 10.117967434 |
| Al | 11.970421348 | 9.094104030  | 11.430113641 |
| O  | 13.461504163 | 8.933962450  | 7.436582212  |
| O  | 9.041867394  | 11.141733664 | 8.643847102  |
| O  | 13.468778789 | 9.213495473  | 10.247580731 |
| O  | 9.105721664  | 11.048070552 | 11.352437437 |
| Al | 11.911684737 | 12.947660073 | 8.486633830  |
| Al | 16.137666292 | 15.223440155 | 7.235976834  |
| O  | 9.127648492  | 15.249809831 | 11.198790311 |
| O  | 13.234592479 | 12.977409068 | 9.917861486  |
| O  | 9.122896920  | 14.861555998 | 8.394822225  |
| O  | 13.321835384 | 13.154772664 | 7.275960970  |

|    |              |              |              |
|----|--------------|--------------|--------------|
| Al | 14.755677513 | 9.068383565  | 8.806302651  |
| Al | 14.753436534 | 8.938853081  | 11.625509735 |
| Al | 14.641833416 | 14.021194885 | 9.954948466  |
| O  | 14.493776284 | 15.083838144 | 11.419672934 |
| O  | 14.719901908 | 15.168815072 | 8.568902851  |
| Al | 10.520605163 | 15.096541453 | 9.869474390  |
| Al | 10.495657443 | 14.970790675 | 7.056028063  |
| Al | 10.449048555 | 10.113054337 | 8.648974625  |
| O  | 10.524368885 | 8.960582650  | 7.268360727  |
| O  | 10.462624816 | 9.024500676  | 10.078386945 |
| Al | 10.538639289 | 12.079982202 | 11.364772462 |
| O  | 10.506575170 | 13.168483519 | 9.911859345  |
| O  | 10.504779752 | 13.069820119 | 7.283635581  |
| Al | 14.622590010 | 11.984810931 | 7.312424030  |
| O  | 14.712123762 | 10.980320837 | 8.815728287  |
| O  | 14.719262893 | 11.123106054 | 11.416412583 |
| H  | 9.952924431  | 9.253746967  | 6.538074180  |
| H  | 12.647680948 | 9.454141657  | 7.568997533  |
| H  | 15.953446497 | 9.608004051  | 6.809287051  |
| H  | 14.725339995 | 14.453891698 | 5.345261031  |
| H  | 11.956559096 | 14.230512685 | 5.391419721  |
| H  | 9.047946823  | 15.585390958 | 5.115236817  |
| H  | 14.237060857 | 10.324132965 | 5.785063428  |
| H  | 16.664997224 | 12.829317080 | 6.399335719  |
| O  | 14.719400664 | 15.166642945 | 6.000489560  |
| O  | 11.919914662 | 15.083691363 | 5.857458270  |
| O  | 9.051985097  | 14.940850891 | 5.838294929  |
| O  | 14.952349196 | 10.970840697 | 5.918228006  |
| O  | 7.701373275  | 9.195171978  | 12.713060359 |
| H  | 7.785363434  | 8.473194693  | 13.359166938 |
| H  | 14.652714289 | 11.740500855 | 12.161398623 |
| O  | 13.326059661 | 9.028608844  | 12.787926835 |
| O  | 10.512353780 | 9.026559348  | 12.738954058 |
| O  | -0.626530054 | 9.030903585  | 12.794050796 |
| H  | -0.584641386 | 9.782452803  | 13.403316602 |
| O  | 2.415733693  | 13.234077055 | 12.649563044 |
| O  | 10.587695805 | 13.313367611 | 12.650037668 |
| H  | 7.486959977  | 14.962191329 | 11.322234556 |
| H  | 13.498117029 | 15.002088129 | 11.541413863 |
| H  | 3.346592556  | 14.593486749 | 11.774529632 |
| H  | 11.530621692 | 14.710923524 | 12.035834797 |
| O  | 1.873365111  | 5.002632505  | 12.791847738 |
| H  | 7.555020400  | 6.949270733  | 11.451074629 |
| H  | 4.143258276  | 6.555153543  | 11.088696122 |
| H  | 15.966797397 | 6.952918838  | 11.500382628 |
| O  | 7.701651557  | 0.967135759  | 12.638941154 |
| H  | 7.780385870  | 0.313927135  | 13.347330383 |
| O  | -0.697763336 | 0.887342174  | 12.713087904 |
| H  | -0.619215536 | 0.110199371  | 13.286664792 |
| H  | 6.339230026  | 3.459639206  | 12.076485338 |
| O  | 4.901469861  | 0.817201209  | 12.641371154 |
| O  | 2.097953478  | 0.882177741  | 12.563653868 |
| H  | 14.816004574 | 3.593913703  | 12.129660452 |
| O  | 13.259018665 | 0.892832897  | 12.787142322 |
| O  | 10.439644797 | 0.963188969  | 12.641771752 |
| O  | 2.171640216  | 9.113989671  | 12.641120250 |
| O  | 4.913984598  | 8.942843668  | 12.698325563 |
| H  | 2.170683625  | 8.323957008  | 13.203023469 |
| H  | 4.860746633  | 9.668816446  | 13.337198303 |
| H  | 13.183768168 | 8.202896405  | 13.297513276 |
| H  | 10.549264602 | 9.644410292  | 13.486211885 |

|   |              |              |              |
|---|--------------|--------------|--------------|
| H | 13.246489263 | 1.631804885  | 13.412853691 |
| H | 10.380501616 | 1.711738528  | 13.254460186 |
| H | 2.093488930  | 1.623644694  | 13.189039416 |
| H | 4.807567961  | -0.009432959 | 13.138636183 |
| H | 9.450558331  | 14.745578644 | 11.980910386 |
| H | 10.668110882 | 13.054225917 | 13.577839672 |
| H | 1.715873551  | 13.909823244 | 12.691210185 |
| H | 0.063181364  | 14.625757418 | 10.932975284 |
| H | 1.072975280  | 6.577454133  | 12.006771538 |
| H | 2.696465317  | 5.428597894  | 13.077659106 |
| H | 6.300034775  | 11.676879418 | 12.040275604 |
| W | 10.521129096 | 6.682057181  | 12.941941149 |
| O | 10.517850033 | 4.921900497  | 12.798653565 |
| O | 9.202291843  | 7.262789463  | 11.447193756 |
| H | 12.063651490 | 7.057215633  | 13.548783589 |
| C | 8.706617383  | 6.851475802  | 14.189355502 |
| H | 8.500276829  | 7.853667331  | 14.602080138 |
| C | 10.759882900 | 6.633836122  | 15.171104908 |
| C | 9.331110081  | 6.075530200  | 15.350136437 |
| H | 9.356153077  | 5.001699056  | 15.095875646 |
| C | 11.864166692 | 5.677768462  | 15.632284245 |
| H | 11.775642481 | 5.501350615  | 16.719761020 |
| H | 11.797173097 | 4.704791287  | 15.126352345 |
| H | 12.868338818 | 6.084417911  | 15.443008011 |
| C | 10.961775938 | 8.000231799  | 15.829534617 |
| H | 10.159024864 | 8.714481315  | 15.592767958 |
| H | 10.991686107 | 7.907419457  | 16.928610026 |
| H | 11.915623976 | 8.448348276  | 15.513120981 |
| C | 8.650459985  | 6.207732762  | 16.721824160 |
| H | 9.285906655  | 5.733594613  | 17.489248015 |
| H | 8.578508792  | 7.273967939  | 16.991733525 |
| H | 7.795792102  | 6.438828890  | 13.729255670 |
| C | 7.255959823  | 5.577199558  | 16.742439846 |
| H | 6.593423170  | 6.058746098  | 16.008774019 |
| H | 7.302646899  | 4.506960978  | 16.490587890 |
| H | 6.782630997  | 5.668157163  | 17.730161162 |

**isobutene (1,2) insertion (side path) into 2a species. E: -2349.991627485**

|    |             |             |              |
|----|-------------|-------------|--------------|
| Al | 0.724730792 | 4.903604323 | 8.589793659  |
| Al | 4.875229386 | 6.973107771 | 7.213875612  |
| O  | 3.415306358 | 7.190813979 | 11.206923596 |
| O  | 7.713973669 | 4.853333320 | 9.758614261  |
| O  | 3.405037242 | 6.845725285 | 8.455043153  |
| O  | 7.781020309 | 5.006122526 | 7.120336308  |
| Al | 4.786894111 | 3.071591018 | 10.033173739 |
| Al | 0.663765275 | 0.966168077 | 11.342200962 |
| O  | 7.629779682 | 0.807937879 | 7.279913453  |
| O  | 3.512575666 | 3.061729587 | 8.645041232  |
| O  | 7.573491313 | 1.126963023 | 10.081164485 |
| O  | 3.508763344 | 2.884341577 | 11.349338123 |
| Al | 7.775334141 | 3.025487186 | 9.935179847  |
| Al | 3.511395740 | 0.974629886 | 11.336480793 |
| O  | 4.993728930 | 0.729346404 | 7.214096185  |
| O  | 0.619201634 | 3.070631467 | 8.640201488  |
| O  | 4.996985409 | 1.133517873 | 10.084463940 |
| O  | 0.688757238 | 2.840365951 | 11.285100350 |
| Al | 3.492491885 | 4.895552394 | 8.475596257  |
| Al | 7.758527490 | 7.120649314 | 7.218950526  |
| O  | 0.765594995 | 7.189392602 | 11.288224518 |
| O  | 4.847492298 | 4.932504812 | 9.931422082  |
| O  | 0.776429054 | 6.851610510 | 8.474529449  |

|    |              |             |              |
|----|--------------|-------------|--------------|
| O  | 4.913266282  | 5.084187792 | 7.274567149  |
| Al | 6.241863125  | 0.944406328 | 8.614807739  |
| Al | 6.287351512  | 0.832586701 | 11.439789816 |
| Al | 6.325850478  | 5.916567477 | 9.928733067  |
| O  | 6.550434298  | 7.020450591 | 11.356549367 |
| O  | 6.370915890  | 7.092114815 | 8.552621051  |
| Al | 2.075704100  | 7.020550328 | 9.909737787  |
| Al | 2.098246266  | 6.875482978 | 7.077755759  |
| Al | 2.047807235  | 2.053003885 | 8.573447544  |
| O  | 2.187180988  | 0.955065895 | 7.126993212  |
| O  | 2.102885699  | 0.876415996 | 9.928714715  |
| Al | 2.073735182  | 3.950735428 | 11.383840255 |
| O  | 2.097454317  | 5.087409023 | 9.919794523  |
| O  | 2.043902344  | 5.011828449 | 7.287143630  |
| Al | 6.224860760  | 3.927623160 | 7.195299651  |
| O  | 6.264303167  | 2.856059673 | 8.655923124  |
| O  | 6.302056865  | 2.913200362 | 11.277170232 |
| H  | 1.918796972  | 1.380383349 | 6.297875332  |
| H  | 4.110069629  | 1.141077336 | 7.280679059  |
| H  | 7.335635784  | 1.400895033 | 6.543127029  |
| H  | 6.274255592  | 7.678148469 | 5.355620333  |
| H  | 3.578109569  | 6.200708184 | 5.336416560  |
| H  | 0.620979405  | 7.610125574 | 5.215891146  |
| H  | 5.881329834  | 2.440337815 | 5.409377469  |
| H  | 8.272683150  | 4.729308902 | 6.321479958  |
| O  | 6.322335901  | 6.946240116 | 5.989177341  |
| O  | 3.507333404  | 7.022331336 | 5.851368560  |
| O  | 0.627536411  | 6.947356119 | 5.920099716  |
| O  | 6.606018184  | 2.978628679 | 5.765990910  |
| Al | 9.169612399  | 4.908800282 | 8.544712382  |
| Al | 13.300875717 | 7.054076313 | 7.309367283  |
| O  | 11.685258075 | 7.259236166 | 11.368680130 |
| O  | 16.117611994 | 4.908552062 | 9.837252105  |
| O  | 11.819488497 | 6.929009415 | 8.546914891  |
| O  | 16.118819709 | 5.061016759 | 7.190893824  |
| Al | 13.207668570 | 3.097080953 | 10.108582690 |
| Al | 9.074318672  | 1.032111004 | 11.341040761 |
| O  | 15.977728724 | 0.889866216 | 7.432713603  |
| O  | 11.926978088 | 3.118988953 | 8.731800739  |
| O  | 15.952298323 | 1.130415642 | 10.170728414 |
| O  | 11.917993329 | 2.889653990 | 11.421463223 |
| Al | 16.188368312 | 3.057856276 | 10.028402759 |
| Al | 11.896720166 | 1.015508335 | 11.445511343 |
| O  | 13.249331202 | 0.791692694 | 7.507763449  |
| O  | 9.120088714  | 3.062011426 | 8.636640973  |
| O  | 13.397364441 | 1.148151489 | 10.235052940 |
| O  | 9.053555627  | 2.903013607 | 11.282424226 |
| Al | 11.926441222 | 4.961193985 | 8.550344766  |
| Al | 16.154277799 | 7.134359921 | 7.296143621  |
| O  | 13.243533859 | 4.926852037 | 9.997494863  |
| O  | 9.176577137  | 6.863098148 | 8.478347252  |
| O  | 13.322354396 | 5.164535013 | 7.353689569  |
| Al | 14.638456552 | 0.977089084 | 8.758554104  |
| Al | 14.692899446 | 0.880414939 | 11.574843845 |
| Al | 14.676323326 | 5.944652699 | 10.027824253 |
| O  | 14.957807749 | 7.025856150 | 11.442877589 |
| O  | 14.742366399 | 7.118044186 | 8.637104305  |
| Al | 10.476637207 | 7.090373904 | 9.959083494  |
| Al | 10.552009458 | 6.955784870 | 7.127040332  |
| Al | 10.567126873 | 2.012121995 | 8.554426139  |
| O  | 10.343716666 | 0.871969765 | 7.187670783  |

|    |              |              |              |
|----|--------------|--------------|--------------|
| O  | 10.514995650 | 0.883844800  | 10.007316843 |
| Al | 10.497680426 | 3.903880624  | 11.236667515 |
| O  | 10.494511606 | 5.150839793  | 9.928881365  |
| O  | 10.520880693 | 5.086268870  | 7.293800937  |
| Al | 14.583765569 | 3.972433242  | 7.342571121  |
| O  | 14.652920677 | 2.897717444  | 8.791085915  |
| O  | 14.723910728 | 2.981806741  | 11.373365765 |
| H  | 9.362222150  | 0.989122292  | 7.070504190  |
| H  | 13.378143313 | 1.362447194  | 6.725892219  |
| H  | 15.713078022 | 1.431466923  | 6.658557399  |
| H  | 14.645788669 | 7.780612252  | 5.465084147  |
| H  | 12.095127741 | 6.239747530  | 5.471565951  |
| H  | 9.078613073  | 6.653966234  | 5.108524809  |
| H  | 14.361579571 | 3.114319921  | 5.119908424  |
| H  | 16.604165821 | 4.895307718  | 6.355785339  |
| O  | 14.729096538 | 7.026284422  | 6.067143441  |
| O  | 11.987395468 | 7.091715082  | 5.928789211  |
| O  | 9.114558094  | 7.176841774  | 5.920588100  |
| O  | 14.647014802 | 2.831160084  | 5.999398985  |
| Al | 0.733829422  | 12.990334732 | 8.557025089  |
| Al | 4.870109818  | 14.988581500 | 7.071815375  |
| O  | 3.505502506  | 15.252144218 | 11.052737496 |
| O  | 7.695603524  | 12.980670559 | 9.756039827  |
| O  | 3.408767989  | 14.866996448 | 8.322219629  |
| O  | 7.723326435  | 12.994532114 | 7.051628795  |
| Al | 4.796137739  | 11.113662779 | 9.975948746  |
| Al | 0.724682452  | 9.150129206  | 11.446997251 |
| O  | 7.640363299  | 8.942771047  | 7.372701002  |
| O  | 3.504322975  | 11.045825831 | 8.563979318  |
| O  | 7.627369352  | 9.268343400  | 10.162225678 |
| O  | 3.519267726  | 10.928224342 | 11.271549503 |
| Al | 7.785312435  | 11.170282412 | 10.015815278 |
| Al | 3.549449861  | 9.064665428  | 11.373964833 |
| O  | 4.995805568  | 8.858574554  | 7.357074332  |
| O  | 0.617268816  | 11.176032824 | 8.712793972  |
| O  | 5.058872113  | 9.189112568  | 10.154052265 |
| O  | 0.711595585  | 11.045213124 | 11.373103171 |
| Al | 3.494916586  | 12.908563386 | 8.369472796  |
| Al | 7.700426353  | 15.087607836 | 7.138237034  |
| O  | 0.794993876  | 15.238486354 | 11.129300804 |
| O  | 4.825739122  | 12.916782264 | 9.766718856  |
| O  | 0.776838070  | 14.922105185 | 8.381765597  |
| O  | 4.899909832  | 13.075713755 | 7.122571970  |
| Al | 6.331005382  | 9.031512806  | 8.702209850  |
| Al | 6.328436378  | 8.975313234  | 11.519483557 |
| Al | 6.218630239  | 13.971258784 | 9.855215686  |
| O  | 6.481581818  | 15.027526019 | 11.284953781 |
| O  | 6.301928359  | 15.109916979 | 8.445949587  |
| Al | 2.162315333  | 15.086801663 | 9.809254386  |
| Al | 2.094777251  | 14.916947917 | 6.983321425  |
| Al | 1.991758891  | 10.091888355 | 8.602045201  |
| O  | 2.109970145  | 8.950988600  | 7.192897551  |
| O  | 2.043593090  | 8.951507682  | 10.006283597 |
| Al | 2.170695798  | 12.079630420 | 11.356335044 |
| O  | 2.106174401  | 13.154932060 | 9.836420597  |
| O  | 2.024770384  | 13.058354930 | 7.206904104  |
| Al | 6.204223729  | 11.909922428 | 7.187451844  |
| O  | 6.281350387  | 10.918449963 | 8.701212015  |
| O  | 6.302358959  | 11.068759387 | 11.285543000 |
| H  | 2.401592283  | 9.350201392  | 6.358077850  |
| H  | 4.180779866  | 9.330732045  | 7.609991759  |



|    |              |              |              |
|----|--------------|--------------|--------------|
| H  | 7.398235303  | 9.551318508  | 6.633177853  |
| H  | 6.347843701  | 14.256846963 | 5.257165292  |
| H  | 3.516104330  | 14.173924514 | 5.261050501  |
| H  | 0.570621607  | 15.654954591 | 5.077357427  |
| H  | 5.719141196  | 10.278673238 | 5.652950160  |
| H  | 8.282713278  | 12.770985710 | 6.278944303  |
| O  | 6.317523293  | 15.019650460 | 5.852087310  |
| O  | 3.493258439  | 15.011495470 | 5.753575853  |
| O  | 0.619055001  | 15.084045154 | 5.854830300  |
| O  | 6.464997904  | 10.893044857 | 5.768708430  |
| Al | 9.140702764  | 12.966812398 | 8.538023500  |
| Al | 13.256311770 | 15.073049216 | 7.220087831  |
| O  | 11.839352522 | 15.259678886 | 11.275986545 |
| O  | 16.134503296 | 13.068316240 | 9.904028094  |
| O  | 11.776234639 | 14.919058459 | 8.468300552  |
| O  | 16.129689029 | 13.078857605 | 7.183207500  |
| Al | 13.228937442 | 11.161098896 | 10.113942452 |
| Al | 9.083613417  | 9.176564417  | 11.414506441 |
| O  | 16.118280521 | 8.948913003  | 7.521209353  |
| O  | 11.947232897 | 11.081810845 | 8.710676476  |
| O  | 16.026783549 | 9.275823339  | 10.252983762 |
| O  | 11.926819139 | 10.970619398 | 11.424237776 |
| Al | 16.208181068 | 11.204139721 | 10.118152406 |
| Al | 11.975823381 | 9.096252612  | 11.427577156 |
| O  | 13.466812672 | 8.938253854  | 7.435406710  |
| O  | 9.046157023  | 11.140314001 | 8.644985140  |
| O  | 13.471959485 | 9.215570067  | 10.247160151 |
| O  | 9.108301425  | 11.045529619 | 11.352567317 |
| Al | 11.913859561 | 12.950000154 | 8.486710534  |
| Al | 16.137928169 | 15.222278046 | 7.235051240  |
| O  | 9.127588109  | 15.249784010 | 11.198952862 |
| O  | 13.235581836 | 12.979155282 | 9.918434022  |
| O  | 9.123017924  | 14.861062608 | 8.394727397  |
| O  | 13.322316823 | 13.155600553 | 7.275555073  |
| Al | 14.757806246 | 9.069586402  | 8.806391918  |
| Al | 14.754931440 | 8.938891552  | 11.624630687 |
| Al | 14.642972447 | 14.021571605 | 9.956000644  |
| O  | 14.495772650 | 15.080013839 | 11.423888726 |
| O  | 14.721000582 | 15.167424065 | 8.568323884  |
| Al | 10.520347003 | 15.095164743 | 9.869626159  |
| Al | 10.495557181 | 14.969049892 | 7.054984526  |
| Al | 10.459386384 | 10.116718393 | 8.647729630  |
| O  | 10.528662802 | 8.962228196  | 7.267013540  |
| O  | 10.500806085 | 9.026532288  | 10.077246139 |
| Al | 10.540429726 | 12.079918406 | 11.365174578 |
| O  | 10.507004379 | 13.168044535 | 9.912000225  |
| O  | 10.505317718 | 13.069632063 | 7.283604436  |
| Al | 14.622273731 | 11.984570626 | 7.312415764  |
| O  | 14.713943463 | 10.981464772 | 8.816675081  |
| O  | 14.720144168 | 11.123828216 | 11.417631082 |
| H  | 9.956850808  | 9.256108573  | 6.537294271  |
| H  | 12.651038718 | 9.454763991  | 7.567769161  |
| H  | 15.959336453 | 9.610003708  | 6.809665293  |
| H  | 14.725209369 | 14.453740473 | 5.344877686  |
| H  | 11.957285658 | 14.230785092 | 5.389758334  |
| H  | 9.047038874  | 15.583190814 | 5.114156132  |
| H  | 14.240623501 | 10.318488074 | 5.792902214  |
| H  | 16.664938429 | 12.827942093 | 6.399403757  |
| O  | 14.719513253 | 15.166602541 | 6.000027242  |
| O  | 11.919820086 | 15.083449672 | 5.856670218  |
| O  | 9.051088810  | 14.939795263 | 5.838205086  |

|   |              |              |              |
|---|--------------|--------------|--------------|
| O | 14.952347562 | 10.970937008 | 5.918388552  |
| O | 7.703639165  | 9.196955289  | 12.714436773 |
| H | 7.764625174  | 8.480934732  | 13.369337115 |
| H | 14.654764036 | 11.741082233 | 12.162840317 |
| O | 13.327491821 | 9.028731757  | 12.787416024 |
| O | 10.515811805 | 9.025200999  | 12.739055370 |
| O | -0.626251618 | 9.030872405  | 12.794109230 |
| H | -0.585696932 | 9.781645388  | 13.404391226 |
| O | 2.415800459  | 13.234396963 | 12.649778049 |
| O | 10.587304512 | 13.313222226 | 12.650451748 |
| H | 7.487635945  | 14.962548894 | 11.323567387 |
| H | 13.500041131 | 14.998552692 | 11.544054855 |
| H | 3.346478031  | 14.593880992 | 11.774693848 |
| H | 11.527967016 | 14.705908658 | 12.035832922 |
| O | 1.873502472  | 5.002983327  | 12.792239451 |
| H | 7.556724921  | 6.950317413  | 11.498627070 |
| H | 4.140883490  | 6.554275733  | 11.086802585 |
| H | 15.966066810 | 6.951976219  | 11.499556011 |
| O | 7.702366079  | 0.968277572  | 12.637973419 |
| H | 7.783440341  | 0.326634116  | 13.356382972 |
| O | -0.697462597 | 0.887023393  | 12.713208419 |
| H | -0.617004820 | 0.112129978  | 13.289562070 |
| H | 6.341580139  | 3.454101507  | 12.081841556 |
| O | 4.901817814  | 0.817267382  | 12.641127985 |
| O | 2.098153275  | 0.882190093  | 12.563649132 |
| H | 14.797748133 | 3.591997590  | 12.124949050 |
| O | 13.260091396 | 0.892184879  | 12.787207162 |
| O | 10.440181774 | 0.963267925  | 12.641466302 |
| O | 2.171621266  | 9.114458252  | 12.641307197 |
| O | 4.912390762  | 8.947064173  | 12.703681220 |
| H | 2.171519136  | 8.325003883  | 13.203978969 |
| H | 4.853061958  | 9.675697216  | 13.339091633 |
| H | 13.186597125 | 8.198674310  | 13.290469077 |
| H | 10.559884505 | 9.650371102  | 13.479868934 |
| H | 13.246809180 | 1.630130848  | 13.413944636 |
| H | 10.383062676 | 1.713704964  | 13.252234480 |
| H | 2.093496860  | 1.623332522  | 13.189403796 |
| H | 4.808005131  | -0.009068903 | 13.138933376 |
| H | 9.449879389  | 14.746017485 | 11.981564134 |
| H | 10.669341996 | 13.054707692 | 13.578284146 |
| H | 1.715839593  | 13.909942000 | 12.692439866 |
| H | 0.064295883  | 14.624652354 | 10.933717859 |
| H | 1.070794868  | 6.577340975  | 12.008302607 |
| H | 2.695951982  | 5.434008328  | 13.072606122 |
| H | 6.301650014  | 11.676791866 | 12.041542673 |
| W | 10.546088068 | 6.670634016  | 12.938094639 |
| O | 10.586121886 | 4.925381423  | 12.728845390 |
| O | 9.215206552  | 7.260508685  | 11.446358091 |
| H | 12.090595744 | 7.037602814  | 13.540865064 |
| C | 8.751194858  | 6.865039092  | 14.211478821 |
| H | 7.816655584  | 6.462464968  | 13.785616986 |
| H | 8.598643428  | 7.906515141  | 14.536010303 |
| C | 10.790609058 | 6.596312889  | 15.176225674 |
| C | 9.311536131  | 6.153976251  | 15.454081502 |
| C | 11.873561948 | 5.605799518  | 15.619833204 |
| H | 11.821629761 | 5.455942278  | 16.713735083 |
| H | 11.771120985 | 4.624507100  | 15.140106822 |
| H | 12.878923874 | 5.983954115  | 15.385157635 |
| C | 11.111417999 | 7.966426973  | 15.786162130 |
| H | 10.359316785 | 8.733200392  | 15.547556673 |
| H | 11.164185551 | 7.905477532  | 16.886301659 |

|   |              |             |              |
|---|--------------|-------------|--------------|
| H | 12.084846519 | 8.333653167 | 15.431110370 |
| C | 8.701987007  | 6.655980811 | 16.779151140 |
| H | 7.642061109  | 6.365127928 | 16.834674953 |
| H | 9.213887542  | 6.217488357 | 17.650183268 |
| H | 8.749843213  | 7.748688900 | 16.871549148 |
| C | 9.076686499  | 4.634128155 | 15.416325526 |
| H | 9.446968689  | 4.161073231 | 14.501141451 |
| H | 9.552773235  | 4.141440540 | 16.276294534 |
| H | 7.996798196  | 4.433483621 | 15.476953834 |

**2butene insertion (side path) into 2a species. E: -2349.992449045**

|    |             |             |              |
|----|-------------|-------------|--------------|
| Al | 0.723316023 | 4.903186816 | 8.589336560  |
| Al | 4.870965218 | 6.974235990 | 7.183839801  |
| O  | 3.415694471 | 7.190114481 | 11.203819802 |
| O  | 7.702589093 | 4.851809381 | 9.758445340  |
| O  | 3.396854418 | 6.844979275 | 8.432366656  |
| O  | 7.774811627 | 5.005426851 | 7.117095143  |
| Al | 4.784155253 | 3.070236462 | 10.030901022 |
| Al | 0.663705370 | 0.966469251 | 11.342129996 |
| O  | 7.629643515 | 0.807873292 | 7.280164035  |
| O  | 3.510459776 | 3.061298844 | 8.643513395  |
| O  | 7.571753137 | 1.126649259 | 10.081087597 |
| O  | 3.508174279 | 2.884020958 | 11.348922046 |
| Al | 7.771247930 | 3.023203680 | 9.936790187  |
| Al | 3.511387388 | 0.974500777 | 11.336818942 |
| O  | 4.992980126 | 0.728687413 | 7.213305731  |
| O  | 0.618502583 | 3.070563820 | 8.640455035  |
| O  | 4.995877877 | 1.132902618 | 10.084751900 |
| O  | 0.688231664 | 2.840672340 | 11.284747136 |
| Al | 3.490291461 | 4.895082946 | 8.467970858  |
| Al | 7.737985143 | 7.115845106 | 7.192707956  |
| O  | 0.766078740 | 7.189354989 | 11.287341579 |
| O  | 4.838692776 | 4.929977808 | 9.925764964  |
| O  | 0.773957935 | 6.851009994 | 8.473185227  |
| O  | 4.912830209 | 5.082405117 | 7.268465167  |
| Al | 6.240114430 | 0.942988672 | 8.614415381  |
| Al | 6.286360619 | 0.835444970 | 11.440602598 |
| Al | 6.309703565 | 5.913478159 | 9.883677016  |
| O  | 6.548202917 | 7.034361812 | 11.280897605 |
| O  | 6.325597973 | 7.085252764 | 8.499647850  |
| Al | 2.076265112 | 7.019937918 | 9.904626739  |
| Al | 2.094159965 | 6.872580872 | 7.072197915  |
| Al | 2.046608418 | 2.052685574 | 8.573012101  |
| O  | 2.186980209 | 0.954504068 | 7.126852814  |
| O  | 2.102436324 | 0.876303079 | 9.928627662  |
| Al | 2.073995074 | 3.951183602 | 11.382632495 |
| O  | 2.096815121 | 5.088145698 | 9.918374004  |
| O  | 2.038584484 | 5.008997314 | 7.284057804  |
| Al | 6.221093190 | 3.922714498 | 7.190962591  |
| O  | 6.254748532 | 2.852127091 | 8.653135792  |
| O  | 6.300378444 | 2.913948319 | 11.276626005 |
| H  | 1.925349446 | 1.380912111 | 6.296141079  |
| H  | 4.109262308 | 1.140062378 | 7.281662674  |
| H  | 7.336533176 | 1.401144467 | 6.543305561  |
| H  | 6.272312384 | 7.685051070 | 5.307098931  |
| H  | 3.572656034 | 6.206736422 | 5.316810043  |
| H  | 0.614722674 | 7.601356705 | 5.206866137  |
| H  | 5.885085298 | 2.434270467 | 5.406303958  |
| H  | 8.271198998 | 4.719514754 | 6.324640502  |
| O  | 6.318562848 | 6.944808556 | 5.930988312  |
| O  | 3.503693783 | 7.021146235 | 5.843094720  |

|    |              |              |              |
|----|--------------|--------------|--------------|
| O  | 0.625619766  | 6.947274736  | 5.918876559  |
| O  | 6.606737975  | 2.976221374  | 5.763548175  |
| Al | 9.153230452  | 4.911384780  | 8.566650815  |
| Al | 13.290378354 | 7.052862617  | 7.311808630  |
| O  | 11.668997754 | 7.260415876  | 11.371014915 |
| O  | 16.116993637 | 4.909157560  | 9.837797130  |
| O  | 11.779939798 | 6.931496429  | 8.557781969  |
| O  | 16.116439443 | 5.061324107  | 7.191197634  |
| Al | 13.202172576 | 3.106637111  | 10.115226723 |
| Al | 9.072868114  | 1.032133859  | 11.340924342 |
| O  | 15.977434837 | 0.890535070  | 7.433039792  |
| O  | 11.924657752 | 3.129434398  | 8.737284434  |
| O  | 15.949999468 | 1.131030294  | 10.170654310 |
| O  | 11.912174320 | 2.901192435  | 11.432432394 |
| Al | 16.187372084 | 3.058338848  | 10.027680612 |
| Al | 11.894036058 | 1.023946634  | 11.446140929 |
| O  | 13.248926496 | 0.792707643  | 7.508914744  |
| O  | 9.114932225  | 3.062561607  | 8.638557363  |
| O  | 13.395337585 | 1.185629539  | 10.237202265 |
| O  | 9.047982987  | 2.901306997  | 11.285798656 |
| Al | 11.918876468 | 4.968709282  | 8.572920092  |
| Al | 16.150625567 | 7.132910499  | 7.296253000  |
| O  | 13.241146260 | 4.932450986  | 9.999569093  |
| O  | 9.125247934  | 6.862359770  | 8.483568382  |
| O  | 13.316202870 | 5.167329405  | 7.358307040  |
| Al | 14.637300795 | 0.984214457  | 8.757850331  |
| Al | 14.691800835 | 0.888445911  | 11.574996760 |
| Al | 14.677918072 | 5.946262957  | 10.029426767 |
| O  | 14.958005800 | 7.026436033  | 11.443622423 |
| O  | 14.736272731 | 7.117232929  | 8.637878772  |
| Al | 10.447290943 | 7.087542350  | 9.980000656  |
| Al | 10.531901459 | 6.955687877  | 7.144922692  |
| Al | 10.565165204 | 2.020809379  | 8.559743776  |
| O  | 10.346145050 | 0.875831131  | 7.191164062  |
| O  | 10.515223740 | 0.885430470  | 10.008393956 |
| Al | 10.481895175 | 3.916206594  | 11.293310441 |
| O  | 10.447739972 | 5.158017936  | 9.985653266  |
| O  | 10.514394187 | 5.087461870  | 7.346665019  |
| Al | 14.578383183 | 3.975067738  | 7.343167390  |
| O  | 14.653031907 | 2.901561485  | 8.790824146  |
| O  | 14.725487271 | 2.985666415  | 11.378438327 |
| H  | 9.364824791  | 0.992693907  | 7.073415483  |
| H  | 13.375731196 | 1.363467807  | 6.726739982  |
| H  | 15.715084536 | 1.433467588  | 6.659061035  |
| H  | 14.642321933 | 7.782477139  | 5.468916900  |
| H  | 12.082593424 | 6.230916180  | 5.486577967  |
| H  | 9.087340340  | 6.663556686  | 5.100321834  |
| H  | 14.363366914 | 3.114206002  | 5.119268751  |
| H  | 16.602626934 | 4.892865184  | 6.357192098  |
| O  | 14.725674925 | 7.026071567  | 6.068405486  |
| O  | 11.973106101 | 7.084504081  | 5.940396702  |
| O  | 9.114183780  | 7.174644094  | 5.920173927  |
| O  | 14.646369861 | 2.832425799  | 5.999997161  |
| Al | 0.733983177  | 12.989361444 | 8.557153637  |
| Al | 4.869928946  | 14.988290015 | 7.071147443  |
| O  | 3.505326699  | 15.252013337 | 11.052771027 |
| O  | 7.693928999  | 12.980316041 | 9.755857020  |
| O  | 3.408428564  | 14.866780560 | 8.322258346  |
| O  | 7.723037198  | 12.994918518 | 7.051250850  |
| Al | 4.793626426  | 11.113027678 | 9.973690917  |
| Al | 0.724684238  | 9.149036473  | 11.446519451 |

|    |              |              |              |
|----|--------------|--------------|--------------|
| O  | 7.636578062  | 8.940711491  | 7.368543071  |
| O  | 3.503135461  | 11.047204188 | 8.563912154  |
| O  | 7.625458709  | 9.269977691  | 10.162076728 |
| O  | 3.518683134  | 10.926764945 | 11.271425315 |
| Al | 7.782726638  | 11.169286948 | 10.013827490 |
| Al | 3.548877297  | 9.063814625  | 11.371389390 |
| O  | 4.991098647  | 8.861957749  | 7.348196340  |
| O  | 0.616474932  | 11.173955899 | 8.712581938  |
| O  | 5.056480431  | 9.190124814  | 10.150533668 |
| O  | 0.711146632  | 11.044686489 | 11.372728661 |
| Al | 3.494729709  | 12.908860504 | 8.369484245  |
| Al | 7.700568748  | 15.088249771 | 7.137733178  |
| O  | 0.794299562  | 15.238763895 | 11.129235214 |
| O  | 4.825287722  | 12.916794988 | 9.767130671  |
| O  | 0.776617373  | 14.922029179 | 8.382050002  |
| O  | 4.899334005  | 13.076259406 | 7.122304611  |
| Al | 6.319398702  | 9.031370586  | 8.693275591  |
| Al | 6.329198913  | 8.975872662  | 11.510989215 |
| Al | 6.217629612  | 13.971818761 | 9.855347891  |
| O  | 6.480979151  | 15.028157125 | 11.284880346 |
| O  | 6.301639632  | 15.109257040 | 8.444842123  |
| Al | 2.162072696  | 15.086800944 | 9.809464275  |
| Al | 2.094474202  | 14.917210187 | 6.983527274  |
| Al | 1.992621485  | 10.091856931 | 8.602294028  |
| O  | 2.109884950  | 8.952133728  | 7.192724256  |
| O  | 2.043866916  | 8.950964758  | 10.005521926 |
| Al | 2.170726883  | 12.079054097 | 11.356408205 |
| O  | 2.105794674  | 13.154817198 | 9.836575512  |
| O  | 2.024374257  | 13.058285566 | 7.206791553  |
| Al | 6.203321404  | 11.910947051 | 7.186023510  |
| O  | 6.274024917  | 10.918761254 | 8.698815872  |
| O  | 6.302387285  | 11.067004649 | 11.286394392 |
| H  | 2.346512091  | 9.362522600  | 6.346140821  |
| H  | 4.168039228  | 9.330626416  | 7.579480471  |
| H  | 7.394347278  | 9.554249176  | 6.632580230  |
| H  | 6.348239110  | 14.257411847 | 5.256237142  |
| H  | 3.515385015  | 14.173661416 | 5.261161886  |
| H  | 0.570585243  | 15.656902260 | 5.079011948  |
| H  | 5.720433472  | 10.274935289 | 5.659662490  |
| H  | 8.283425493  | 12.770378637 | 6.279584691  |
| O  | 6.317597569  | 15.019849699 | 5.851601237  |
| O  | 3.492825292  | 15.011438716 | 5.753355190  |
| O  | 0.618722198  | 15.083981752 | 5.855037658  |
| O  | 6.464713796  | 10.893009626 | 5.768308406  |
| Al | 9.139535861  | 12.967475489 | 8.538351210  |
| Al | 13.256060007 | 15.073257370 | 7.221474537  |
| O  | 11.840336448 | 15.263670617 | 11.274795032 |
| O  | 16.133571086 | 13.067840658 | 9.903658252  |
| O  | 11.776473423 | 14.918870798 | 8.469058245  |
| O  | 16.129600039 | 13.078598371 | 7.183600069  |
| Al | 13.224651217 | 11.156163591 | 10.114057875 |
| Al | 9.078048748  | 9.186477677  | 11.431307877 |
| O  | 16.116449559 | 8.948096404  | 7.521117981  |
| O  | 11.936779147 | 11.072975267 | 8.714571579  |
| O  | 16.024239070 | 9.275513653  | 10.252926078 |
| O  | 11.923373344 | 10.966608643 | 11.425666990 |
| Al | 16.207333726 | 11.203308648 | 10.117875265 |
| Al | 11.967666273 | 9.090856924  | 11.439316530 |
| O  | 13.461158900 | 8.934274484  | 7.436698610  |
| O  | 9.042330386  | 11.141775195 | 8.644282784  |
| O  | 13.467816446 | 9.213653651  | 10.248581825 |

|    |              |              |              |
|----|--------------|--------------|--------------|
| O  | 9.105992411  | 11.048505020 | 11.354877437 |
| Al | 11.911354854 | 12.946300569 | 8.486890156  |
| Al | 16.137643272 | 15.223514851 | 7.236055567  |
| O  | 9.127796134  | 15.249877996 | 11.198758935 |
| O  | 13.234080013 | 12.975948529 | 9.918009024  |
| O  | 9.123030994  | 14.861543814 | 8.394966340  |
| O  | 13.321749108 | 13.154392453 | 7.276302902  |
| Al | 14.755072856 | 9.068252694  | 8.806385763  |
| Al | 14.753561421 | 8.940176165  | 11.624534283 |
| Al | 14.641238686 | 14.020487777 | 9.954761653  |
| O  | 14.493659547 | 15.083805078 | 11.419002106 |
| O  | 14.719777913 | 15.168672006 | 8.568875801  |
| Al | 10.520749425 | 15.096470026 | 9.869712381  |
| Al | 10.495754534 | 14.970897191 | 7.056399142  |
| Al | 10.446799500 | 10.110240462 | 8.652873702  |
| O  | 10.523772706 | 8.960181402  | 7.270257150  |
| O  | 10.452221044 | 9.022516382  | 10.085047827 |
| Al | 10.539070549 | 12.080395358 | 11.366599157 |
| O  | 10.506786240 | 13.167747884 | 9.912403449  |
| O  | 10.504814143 | 13.069748923 | 7.283771290  |
| Al | 14.622756842 | 11.984634082 | 7.312636736  |
| O  | 14.711864837 | 10.980148961 | 8.815963638  |
| O  | 14.719142603 | 11.122871582 | 11.417115233 |
| H  | 9.948388737  | 9.253166499  | 6.542981532  |
| H  | 12.647788705 | 9.455068840  | 7.570083124  |
| H  | 15.952511141 | 9.607760034  | 6.809177023  |
| H  | 14.725173283 | 14.453955200 | 5.345238782  |
| H  | 11.956241054 | 14.230585244 | 5.391470383  |
| H  | 9.048075061  | 15.585560917 | 5.115439939  |
| H  | 14.236485373 | 10.325122861 | 5.783843520  |
| H  | 16.664718941 | 12.829467784 | 6.399153020  |
| O  | 14.719371286 | 15.166551337 | 6.000634411  |
| O  | 11.919931301 | 15.083671406 | 5.857693443  |
| O  | 9.052058281  | 14.940933069 | 5.838413990  |
| O  | 14.952401372 | 10.970829817 | 5.918306273  |
| O  | 7.703553523  | 9.187681938  | 12.723979438 |
| H  | 7.812796900  | 8.460689311  | 13.363425266 |
| H  | 14.653409473 | 11.740360685 | 12.162095128 |
| O  | 13.326969156 | 9.027777376  | 12.789656694 |
| O  | 10.510311426 | 9.023443794  | 12.774658491 |
| O  | -0.626596096 | 9.030914679  | 12.793921665 |
| H  | -0.584231629 | 9.782035493  | 13.403696265 |
| O  | 2.415665013  | 13.234174011 | 12.649645668 |
| O  | 10.587790818 | 13.313653377 | 12.650881262 |
| H  | 7.486798882  | 14.963048299 | 11.323088630 |
| H  | 13.498032396 | 15.002197340 | 11.541194838 |
| H  | 3.346630749  | 14.593678770 | 11.774663710 |
| H  | 11.530758879 | 14.711669962 | 12.036425115 |
| O  | 1.873364428  | 5.002628558  | 12.791842683 |
| H  | 7.548681864  | 6.951363392  | 11.451692304 |
| H  | 4.143126395  | 6.555189223  | 11.086495356 |
| H  | 15.966448576 | 6.953020184  | 11.501412387 |
| O  | 7.701949238  | 0.967406740  | 12.638855564 |
| H  | 7.779988626  | 0.318194025  | 13.350888713 |
| O  | -0.697795374 | 0.887328928  | 12.713058663 |
| H  | -0.619184239 | 0.110384987  | 13.286889731 |
| H  | 6.343416103  | 3.464669965  | 12.075287187 |
| O  | 4.901400480  | 0.817219412  | 12.641481422 |
| O  | 2.097990801  | 0.882152524  | 12.563634425 |
| H  | 14.816850854 | 3.594157262  | 12.129606907 |
| O  | 13.259092261 | 0.892758111  | 12.787010132 |

|   |              |              |              |
|---|--------------|--------------|--------------|
| O | 10.439738625 | 0.963176910  | 12.641853224 |
| O | 2.172066981  | 9.113950270  | 12.641035126 |
| O | 4.914931009  | 8.941670645  | 12.696123779 |
| H | 2.171410438  | 8.323352557  | 13.202196990 |
| H | 4.861786870  | 9.659682942  | 13.343778963 |
| H | 13.191844091 | 8.197439800  | 13.293876107 |
| H | 10.559061544 | 9.637847939  | 13.523935895 |
| H | 13.246544933 | 1.631463721  | 13.412979673 |
| H | 10.380675643 | 1.709744854  | 13.256966823 |
| H | 2.093833856  | 1.623485598  | 13.189189167 |
| H | 4.808162733  | -0.009661928 | 13.138431461 |
| H | 9.450487653  | 14.745821959 | 11.981066522 |
| H | 10.664157818 | 13.054218407 | 13.578966474 |
| H | 1.715854949  | 13.909929232 | 12.691710992 |
| H | 0.062853814  | 14.626193180 | 10.932810912 |
| H | 1.073961373  | 6.577828940  | 12.006813496 |
| H | 2.697393617  | 5.423803551  | 13.082002752 |
| H | 6.298728398  | 11.676971289 | 12.040908045 |
| W | 10.520591197 | 6.679352309  | 12.965016858 |
| O | 10.528394602 | 4.920690218  | 12.811733667 |
| O | 9.200684194  | 7.264724905  | 11.500465761 |
| H | 12.090009011 | 7.030884326  | 13.494103596 |
| C | 8.703053125  | 6.642238627  | 14.313637118 |
| H | 8.330242261  | 7.634035149  | 14.637436709 |
| C | 10.861981494 | 6.832531455  | 15.178986822 |
| C | 9.532515947  | 6.134979733  | 15.499048288 |
| H | 9.689181476  | 5.050545932  | 15.355428301 |
| C | 7.527530862  | 5.722178062  | 13.964678522 |
| H | 7.891736588  | 4.784044536  | 13.517463946 |
| H | 6.973571045  | 5.453286980  | 14.880996068 |
| H | 6.803993874  | 6.166007736  | 13.274636814 |
| C | 12.082120996 | 6.047553109  | 15.674728237 |
| H | 12.020679968 | 5.909643932  | 16.769750716 |
| H | 12.138474649 | 5.050078982  | 15.215985688 |
| H | 13.027853922 | 6.565828544  | 15.457467345 |
| C | 10.930512172 | 8.265162333  | 15.710776765 |
| H | 10.025824518 | 8.848210348  | 15.480480166 |
| H | 11.037321520 | 8.267308618  | 16.809095815 |
| H | 11.803496903 | 8.797495815  | 15.302305244 |
| C | 8.924648242  | 6.332413018  | 16.895254568 |
| H | 7.982450313  | 5.773700901  | 16.992094601 |
| H | 9.602103561  | 5.975956222  | 17.686109120 |
| H | 8.704926999  | 7.392309251  | 17.089038382 |
